# Supplementary material for: Transcriptomic profiling of an in vivo diffuse large B-cell lymphoma model reveals molecular programs underlying CNS dissemination
Source: Research Square preprint supplement (doi:10.21203/rs.3.rs-8729569/v1), 2026-02-18
Supplement: Supplementary file 1 [file 292b8d7b4f39b31077dcd757.xlsx]

## Sheet: Table S1.
Supplementary Table 1. Baseline clinicopathologic characteristics of patient samples
		sCNSi+ (n = 19)	sCNSi− (n = 16)
Age, years (median [range])		60 [36-79]	62 [44-75]
Sex, n (%)	Female	9 (47.4%)	4 (25.0%)
	Male	10 (52.6%)	12 (75.0%)
COO, n (%)	GCB	4 (21.1%)	3 (18.8%)
	non-GCB	14 (73.7%)	11 (68.8%)
	NA	1 (5.3%)	2 (12.5%)
IPI, n (%)	Low (0-1)	1 (5.3%)	1 (6.3%)
	Intermediate (2-3)	11 (57.9%)	6 (37.5%)
	High (4-6)	7 (36.8%)	9 (56.3%)
CNS-IPI, n (%)	Low (0-1)	1 (5.3%)	1 (6.2%)
	Intermediate (2-3)	6 (31.6%)	5 (31.2%)
	High (4-6)	12 (63.2%)	10 (62.5%)
Pattern of CNS involvement	CNS only	11 (57.9%)	0 (0.0%)
	CNS+systemic	8 (42.1%)	0 (0.0%)

## Sheet: Table S2.
Supplementary Table 2. Gene expression changes (ΔOCI-LY19 vs ΔToledo) using original cells as the reference
Symbol	delta OCI	delta Toledo	category
SH3BP5	4.60324	0.240258	up (OCI-LY19)
TSC22D3	4.52993	-0.77092	up (OCI-LY19)
MTUS1	3.09214	0	up (OCI-LY19)
BCL6B	3.20067	0	up (OCI-LY19)
SCNN1D	-1.85737	1.62665	up (Toledo)
ACAP3	-1.44755	1.50977	up (Toledo)
COL8A2	2.97461	0	up (OCI-LY19)
CPTP	0.127173	2.89475	up (Toledo)
PLAC8	3.67359	1.90169	up (both)
TOX2	3.47568	0.227034	up (OCI-LY19)
SLA	3.06968	-0.119715	up (OCI-LY19)
ISG20	3.22744	-0.320682	up (OCI-LY19)
KLF2	3.5761	-0.487804	up (OCI-LY19)
ADGRE2	2.46643	0	up (OCI-LY19)
SIPA1L2	2.08613	0.294392	up (OCI-LY19)
SPOCK2	2.71441	0.413396	up (OCI-LY19)
CACNA2D4	2.76057	0.147354	up (OCI-LY19)
MST1L	2.63436	-1.00901	up (OCI-LY19)
LILRA2	2.77753	0	up (OCI-LY19)
HAL	2.45144	0	up (OCI-LY19)
FOS	2.81019	0.17247	up (OCI-LY19)
DOCK6	2.41182	-0.187357	up (OCI-LY19)
KLF6	2.69583	0.871321	up (OCI-LY19)
F2RL3	2.59787	0	up (OCI-LY19)
TMCC3	2.08472	-0.211185	up (OCI-LY19)
ZNF333	1.94324	-0.0143184	up (OCI-LY19)
LGR6	2.51462	0.224165	up (OCI-LY19)
YPEL5	2.59169	-0.0226216	up (OCI-LY19)
CHST2	2.46946	1.14274	up (both)
S100A4	2.68384	3.6834	up (both)
ACOT7	1.16645	0.108722	up (OCI-LY19)
PPP2R2C	2.20612	0	up (OCI-LY19)
EGR1	2.42507	2.63155	up (both)
JUN	2.38359	-1.4207	up (OCI-LY19)
GSN	2.16931	0.174148	up (OCI-LY19)
NDRG1	2.30823	0.331938	up (OCI-LY19)
PKIG	2.35825	0.295026	up (OCI-LY19)
SLC2A5	-0.8549	1.07295	up (Toledo)
UCP2	2.35471	1.85643	up (both)
TMEM201	-0.0791933	1.09711	up (Toledo)
HSPG2	1.24038	0	up (OCI-LY19)
TLE3	2.01825	0.532057	up (OCI-LY19)
LDLRAD2	1.95987	0	up (OCI-LY19)
PPP1R15A	2.18426	-1.91625	up (OCI-LY19)
STAG3	2.0944	0	up (OCI-LY19)
PVRIG	2.14464	0	up (OCI-LY19)
MX1	1.98617	2.275	up (both)
HRK	2.12795	1.46995	up (both)
S100A6	2.33889	0.903665	up (OCI-LY19)
MASP2	1.12195	0	up (OCI-LY19)
HLA-DMB	2.10986	-1.98727	up (OCI-LY19)
HSPA1A	2.0385	0	up (OCI-LY19)
UBXN11	2.03899	0.0509366	up (OCI-LY19)
FBXO44	-1.86092	1.55144	up (Toledo)
PLCH1	1.65037	0.165995	up (OCI-LY19)
MSRA	1.94419	0.133177	up (OCI-LY19)
PXDN	1.5498	0	up (OCI-LY19)
RHOB	1.91546	-0.863948	up (OCI-LY19)
DDIT4	1.91167	0.0967284	up (OCI-LY19)
PREX1	1.58273	0.113274	up (OCI-LY19)
CSTA	1.94572	0	up (OCI-LY19)
JUND	1.87422	1.07498	up (both)
AIF1	2.10916	1.86633	up (both)
HLA-DQA1	1.82498	-2.10581	up (OCI-LY19)
RPL15	1.77385	-0.352542	up (OCI-LY19)
CIDEB	1.83411	3.50752	up (both)
GRAP	1.77953	-0.866363	up (OCI-LY19)
RPS27	1.75431	-0.352172	up (OCI-LY19)
HCST	1.98905	1.00765	up (both)
YPEL2	1.53909	-0.00988106	up (OCI-LY19)
ZDHHC24	1.90919	1.08868	up (both)
RASAL3	1.68566	-1.39435	up (OCI-LY19)
ATP13A2	-0.744258	1.44454	up (Toledo)
CD69	1.71774	0.185369	up (OCI-LY19)
IER3	1.75797	-0.843668	up (OCI-LY19)
FHL1	1.51443	0.855742	up (OCI-LY19)
S100A16	1.65464	0	up (OCI-LY19)
GZMA	1.66956	0	up (OCI-LY19)
EDARADD	1.59198	-0.00696109	up (OCI-LY19)
OSR2	1.62194	2.70839	up (both)
SOX7	1.60599	0	up (OCI-LY19)
APLP2	1.60511	0.911616	up (OCI-LY19)
KLF9	1.41046	-0.359308	up (OCI-LY19)
PINK1	2.17553	-1.1591	up (OCI-LY19)
RAB37	1.50931	0.307871	up (OCI-LY19)
RASA4	1.47151	0	up (OCI-LY19)
ZNF629	1.39202	1.57312	up (both)
BCAR3	1.51603	0.0513177	up (OCI-LY19)
RAB3D	1.45768	1.49021	up (both)
IRF2BPL	1.52324	0.477782	up (OCI-LY19)
LYN	1.50877	-0.165375	up (OCI-LY19)
BMF	1.1611	0.347613	up (OCI-LY19)
ZNF414	1.66847	-1.09167	up (OCI-LY19)
ZNF792	1.45891	-0.269032	up (OCI-LY19)
CSRNP1	1.49813	1.46964	up (both)
PIK3IP1	1.54185	3.15283	up (both)
ANXA6	1.48786	0.135442	up (OCI-LY19)
ALKBH7	1.57366	-0.234449	up (OCI-LY19)
VPS18	1.42545	-0.710009	up (OCI-LY19)
GALE	-0.768302	1.00989	up (Toledo)
RGS2	1.55427	2.48666	up (both)
TAGAP	1.39464	-1.42393	up (OCI-LY19)
IRF8	1.48774	0	up (OCI-LY19)
ICAM3	1.52446	1.06939	up (both)
TP53INP1	1.40203	-0.0837676	up (OCI-LY19)
UBLCP1	1.49394	1.78687	up (both)
SCRN2	1.5528	-2.05413	up (OCI-LY19)
TEAD2	1.42415	0	up (OCI-LY19)
RHCE	1.10533	0.164559	up (OCI-LY19)
SLC5A10	1.47119	0	up (OCI-LY19)
TMEM238	1.63663	-1.54119	up (OCI-LY19)
PAQR7	1.04401	-1.61588	up (OCI-LY19)
GCHFR	1.60686	-0.147074	up (OCI-LY19)
PAFAH2	0.146419	1.13493	up (Toledo)
ARL8A	1.43091	0.357429	up (OCI-LY19)
PPFIBP2	1.32221	0.237793	up (OCI-LY19)
ANXA2	1.42792	-0.913673	up (OCI-LY19)
ABHD4	1.44429	0.819173	up (OCI-LY19)
N4BP3	1.23726	-0.741762	up (OCI-LY19)
APH1B	1.32555	-0.152182	up (OCI-LY19)
SOCS2	1.39179	0.539149	up (OCI-LY19)
ARSD	1.29796	0	up (OCI-LY19)
FBXO32	1.14813	0.924864	up (OCI-LY19)
ZDHHC18	-0.506509	1.30291	up (Toledo)
UBXN6	1.38953	1.1318	up (both)
MXD4	1.35491	1.12652	up (both)
TNFSF13B	1.37716	-0.0791788	up (OCI-LY19)
MAP3K6	-0.213256	2.64032	up (Toledo)
PLIN2	1.37978	0.145755	up (OCI-LY19)
TMED8	1.49816	0.526729	up (OCI-LY19)
PGPEP1	1.02543	1.0072	up (both)
ERGIC3	1.37606	0.401607	up (OCI-LY19)
THEMIS2	1.61399	0.951276	up (OCI-LY19)
RPS11	1.35802	-0.22597	up (OCI-LY19)
CHMP2A	1.39421	1.73237	up (both)
TNFSF4	1.30145	-0.0992936	up (OCI-LY19)
LGALS9	1.3582	1.38967	up (both)
CD37	1.42305	0.116254	up (OCI-LY19)
GAL3ST4	1.34576	-0.881167	up (OCI-LY19)
ANKRD37	1.48284	0.910483	up (OCI-LY19)
ZYX	1.3468	1.06802	up (both)
SMAP2	1.32342	0.317249	up (OCI-LY19)
HLA-E	1.30777	-1.19831	up (OCI-LY19)
RPS5	1.29192	-0.213652	up (OCI-LY19)
FIS1	1.34475	-1.2607	up (OCI-LY19)
ZNF574	1.26621	-0.0140447	up (OCI-LY19)
PCBD1	1.37653	0.408785	up (OCI-LY19)
PITPNC1	1.2256	0.215022	up (OCI-LY19)
PTPRC	1.18306	0.342982	up (OCI-LY19)
SNRNP40	-0.91707	1.21632	up (Toledo)
TGFBRAP1	1.21998	0.507973	up (OCI-LY19)
VAT1	1.26077	-0.713427	up (OCI-LY19)
BST2	1.31373	1.76548	up (both)
NEIL2	1.26136	-1.31049	up (OCI-LY19)
CTSO	1.24413	-0.396714	up (OCI-LY19)
RBM43	1.17913	-1.38175	up (OCI-LY19)
RIPK1	1.20482	-0.528884	up (OCI-LY19)
RPS29	1.22966	-0.181791	up (OCI-LY19)
FLT3	1.19911	0	up (OCI-LY19)
IQCC	-0.515984	1.10284	up (Toledo)
TMEM234	1.70304	1.96628	up (both)
CYTIP	1.2338	-0.824059	up (OCI-LY19)
WFS1	1.18951	-0.466479	up (OCI-LY19)
FAM229A	0.915196	2.74114	up (Toledo)
AK4	1.1508	0	up (OCI-LY19)
MT1F	1.26373	-0.314433	up (OCI-LY19)
LDLRAD3	1.15177	0.275019	up (OCI-LY19)
ZDHHC14	1.16144	0.0959153	up (OCI-LY19)
PLEK	1.19456	-1.9822	up (OCI-LY19)
RCAN1	1.14787	-0.449158	up (OCI-LY19)
TMEM217	1.16111	0	up (OCI-LY19)
DHRS3	1.23056	0	up (OCI-LY19)
DYNLL2	1.2815	0.0179122	up (OCI-LY19)
CD96	1.14451	0	up (OCI-LY19)
MST1	1.2222	0	up (OCI-LY19)
STAT5A	1.14321	0.696269	up (OCI-LY19)
QSOX1	1.18211	0.479889	up (OCI-LY19)
ABHD14B	1.18664	0.499515	up (OCI-LY19)
GPC2	1.17514	-0.909911	up (OCI-LY19)
C1orf216	-0.463874	1.41711	up (Toledo)
CCDC28A	1.2294	-0.531793	up (OCI-LY19)
INTS12	1.22539	-0.720186	up (OCI-LY19)
DUSP3	1.09903	1.50926	up (both)
NFIL3	1.18472	-0.269028	up (OCI-LY19)
CCNB1IP1	1.16848	-0.216438	up (OCI-LY19)
TMEM104	1.07971	-0.0422131	up (OCI-LY19)
LY86	1.25405	-0.211155	up (OCI-LY19)
C17orf49	1.16456	0.70583	up (OCI-LY19)
OSCP1	2.22185	0.834614	up (OCI-LY19)
CD44	1.13628	-0.463734	up (OCI-LY19)
ZC3H12A	0.104222	2.94739	up (Toledo)
RPS21	1.14171	0.125878	up (OCI-LY19)
SERPINB1	1.13695	0.0849259	up (OCI-LY19)
NUDT8	1.24142	2.12024	up (both)
SLC25A44	1.10988	-1.95446	up (OCI-LY19)
RPS2	1.12083	0.00773309	up (OCI-LY19)
MMP24	1.069	0	up (OCI-LY19)
GSTZ1	1.20869	0.810289	up (OCI-LY19)
EIF3F	1.12201	0.0188204	up (OCI-LY19)
LCMT1	1.20545	-0.369857	up (OCI-LY19)
BTG1	1.10724	-0.561528	up (OCI-LY19)
AP1B1	1.10584	0.763909	up (OCI-LY19)
LRRC75A	1.10918	-1.25787	up (OCI-LY19)
PMAIP1	1.11588	-1.39677	up (OCI-LY19)
BTG2	1.10889	0.935633	up (OCI-LY19)
RPS18	1.10211	0.0534908	up (OCI-LY19)
NEK6	1.09013	0.493336	up (OCI-LY19)
EFHD2	1.10103	1.32128	up (both)
NAT9	1.1158	-0.457246	up (OCI-LY19)
MYCL	0.575661	1.16895	up (Toledo)
NLE1	1.10696	0.998342	up (OCI-LY19)
PTPN7	1.05098	0.965421	up (OCI-LY19)
RPL37A	1.08754	0.0879622	up (OCI-LY19)
ETS2	1.07713	0.600334	up (OCI-LY19)
CDK9	1.09439	2.44698	up (both)
RPS10	1.07674	-0.561148	up (OCI-LY19)
EXO5	-1.34656	1.94575	up (Toledo)
SASH3	1.0803	-1.00651	up (OCI-LY19)
LRIG1	1.00087	0.491426	up (OCI-LY19)
GPKOW	1.14981	1.47617	up (both)
KLHL24	1.02298	0.279791	up (OCI-LY19)
RPL36A	1.06309	-0.365608	up (OCI-LY19)
DFFA	1.12121	-0.321116	up (OCI-LY19)
ITM2C	1.07098	1.10227	up (both)
PARP3	1.06632	-0.23396	up (OCI-LY19)
ERMAP	1.04347	0	up (OCI-LY19)
ZNF691	-1.01118	1.77881	up (Toledo)
TRAF5	1.01334	0.170214	up (OCI-LY19)
RPL37	1.05149	-0.0613179	up (OCI-LY19)
ARHGAP25	1.04341	-0.370542	up (OCI-LY19)
AP1S3	1.01462	-0.441323	up (OCI-LY19)
TNFRSF14	1.03564	-0.0516636	up (OCI-LY19)
RGS1	1.11641	0.209028	up (OCI-LY19)
SORBS3	1.02684	0	up (OCI-LY19)
RPS9	1.03258	-0.495479	up (OCI-LY19)
PARVB	1.04203	0.251487	up (OCI-LY19)
ADGRE5	1.00811	0.401242	up (OCI-LY19)
EXOSC4	1.06958	0.0811541	up (OCI-LY19)
BEST4	0.570675	1.42811	up (Toledo)
PTCH2	1.21724	0	up (OCI-LY19)
ALOX5AP	1.01052	-0.462628	up (OCI-LY19)
RPS3	1.00076	0.482629	up (OCI-LY19)
HPDL	0.0871526	2.26524	up (Toledo)
MT2A	1.00393	1.09895	up (both)
FOXD2	-1.97616	1.54127	up (Toledo)
HSPA1B	0.979042	1.93633	up (Toledo)
RABAC1	1.00087	0.286082	up (OCI-LY19)
YIPF1	1.1965	-0.244016	up (OCI-LY19)
FRAT1	0.916497	2.58322	up (Toledo)
GABARAP	0.90083	1.04387	up (Toledo)
ID2	0.907718	1.26831	up (Toledo)
OTUB1	0.892486	1.27144	up (Toledo)
C18orf32	0.905702	1.43829	up (Toledo)
PNRC1	0.879942	1.72533	up (Toledo)
IFI44L	1.88415	-1.21018	up (OCI-LY19)
IFI44	1.12331	0	up (OCI-LY19)
G6PD	0.882523	1.03656	up (Toledo)
PPT2	0.871077	1.80815	up (Toledo)
PRICKLE3	0.836577	2.16443	up (Toledo)
GBP3	-1.62693	-1.07757	down (both)
FRAT2	0.833048	1.18215	up (Toledo)
FBXO41	0.738244	2.2676	up (Toledo)
MAP3K1	0.745301	1.66506	up (Toledo)
PRAF2	0.837632	1.38511	up (Toledo)
DHRS1	0.8026	1.77414	up (Toledo)
HIGD2A	0.78913	1.36796	up (Toledo)
S1PR1	0.180631	1.35008	up (Toledo)
HSPBP1	0.794221	1.01089	up (Toledo)
TAF13	3.24191	0.259982	up (OCI-LY19)
SORT1	-0.583783	1.10765	up (Toledo)
ATXN7L2	0.128506	1.21808	up (Toledo)
RCSD1	0.753791	1.45475	up (Toledo)
SPINT2	0.781953	1.35606	up (Toledo)
CHI3L2	-0.321341	1.12261	up (Toledo)
OVGP1	1.01232	0	up (OCI-LY19)
CAPNS1	0.74629	1.18237	up (Toledo)
RHOC	1.09043	-0.0973883	up (OCI-LY19)
SYK	0.723661	1.3228	up (Toledo)
DCLRE1B	-1.53427	1.42958	up (Toledo)
KAT5	0.744589	1.72743	up (Toledo)
MT1X	0.743404	1.58602	up (Toledo)
ZFAND2B	0.789276	2.43679	up (Toledo)
RPSA	0.711528	1.0457	up (Toledo)
HPS1	0.700399	1.87722	up (Toledo)
ALKBH2	0.738923	2.15022	up (Toledo)
PIAS3	-0.221059	1.35242	up (Toledo)
NUDT17	1.02961	3.03963	up (both)
RNF123	0.670922	1.13909	up (Toledo)
BOLA1	-1.16529	2.29546	up (Toledo)
SRRD	0.721012	2.77675	up (Toledo)
BNIPL	-0.419429	1.16471	up (Toledo)
SEMA6C	-1.50867	1.0347	up (Toledo)
HSPB1	0.672995	2.22276	up (Toledo)
S100A10	1.34619	1.23298	up (both)
LCE3E	1.08104	0	up (OCI-LY19)
SPRR2A	0.379009	4.31638	up (Toledo)
S100A2	1.04068	0	up (OCI-LY19)
DEDD2	0.679682	1.32565	up (Toledo)
SH3BGRL3	0.63703	1.00104	up (Toledo)
ATP8B2	0.296983	1.6973	up (Toledo)
TRIM46	0.339043	2.40936	up (Toledo)
MUC1	1.34056	0	up (OCI-LY19)
PSMD13	0.605872	1.03159	up (Toledo)
NIPSNAP1	0.599072	1.17283	up (Toledo)
SEMA4A	1.26331	-1.21014	up (OCI-LY19)
PAQR6	0.0925268	1.84752	up (Toledo)
GLMP	0.627086	2.48423	up (Toledo)
AAR2	0.608127	1.21647	up (Toledo)
CRABP2	0.86642	3.02387	up (Toledo)
GSTK1	0.60164	1.0944	up (Toledo)
DDX41	0.593236	2.40631	up (Toledo)
P2RX1	0.604486	1.5641	up (Toledo)
VANGL2	-0.0135246	1.11668	up (Toledo)
TSR3	0.592544	1.2033	up (Toledo)
USP21	-0.601459	2.99171	up (Toledo)
FCER1G	0.755603	1.51568	up (Toledo)
ISG20L2	0.571483	1.08155	up (Toledo)
R3HCC1L	0.569867	1.16536	up (Toledo)
SELL	-1.0413	-1.14636	down (both)
METTL18	-1.62201	1.66891	up (Toledo)
SLC2A3	0.554268	1.90771	up (Toledo)
C8orf82	0.597794	1.58998	up (Toledo)
NCKAP1L	0.54365	1.10946	up (Toledo)
MAPKAPK3	0.554258	1.24282	up (Toledo)
NOP9	0.519257	1.66682	up (Toledo)
RGL1	1.18636	-0.0758392	up (OCI-LY19)
NME4	0.532844	1.61266	up (Toledo)
TMEM120A	0.546765	3.30805	up (Toledo)
COPE	0.540022	1.0313	up (Toledo)
C1orf53	2.66915	0.296139	up (OCI-LY19)
NUDT16L1	0.523781	1.17733	up (Toledo)
SHISA4	-0.449011	2.43821	up (Toledo)
EIF5A	0.513473	1.32124	up (Toledo)
BTF3L4	0.506287	1.54968	up (Toledo)
MAN2B1	0.50886	1.01483	up (Toledo)
LAX1	1.28257	-1.17233	up (OCI-LY19)
RNF166	0.515539	1.03348	up (Toledo)
PIK3C2B	-0.296153	1.07365	up (Toledo)
TMCC2	-0.539924	1.53588	up (Toledo)
NUAK2	-0.853388	1.08679	up (Toledo)
PUF60	0.505019	1.02478	up (Toledo)
IKBKE	-0.364143	1.29634	up (Toledo)
BATF3	-1.50366	-2.40901	down (both)
PROX1	0.0332622	1.22263	up (Toledo)
SMIM19	0.487107	1.00574	up (Toledo)
UBA52	0.473484	1.2665	up (Toledo)
TMEM63A	-1.80001	-1.04823	down (both)
PSEN2	1.01313	-0.0377738	up (OCI-LY19)
JMJD4	-0.847613	1.25155	up (Toledo)
ACTA1	-1.78394	1.74995	up (Toledo)
RNASEK	0.459628	2.87544	up (Toledo)
MLF2	0.460485	2.18906	up (Toledo)
NDUFB7	0.466871	1.48428	up (Toledo)
CRTAP	0.431603	1.13379	up (Toledo)
BLOC1S1	0.474977	1.30841	up (Toledo)
AKR1C3	2.64567	0	up (OCI-LY19)
TSR2	0.457034	1.43621	up (Toledo)
ASB13	1.0741	2.43986	up (both)
FMNL1	0.42965	1.52766	up (Toledo)
IL2RA	1.56707	0	up (OCI-LY19)
ECHDC3	1.56931	-1.12288	up (OCI-LY19)
HSPA8	0.414639	1.39214	up (Toledo)
CDNF	1.71985	0	up (OCI-LY19)
ACBD7	-0.950858	1.5301	up (Toledo)
FAM171A1	2.25069	0	up (OCI-LY19)
IDH3B	0.414026	1.53866	up (Toledo)
GPX1	0.406938	2.10525	up (Toledo)
HMGA1	0.395835	2.25039	up (Toledo)
SAMM50	0.407211	1.09625	up (Toledo)
MAP3K8	1.14741	0	up (OCI-LY19)
FZD8	0	1.31834	up (Toledo)
NR3C1	0.381562	1.3328	up (Toledo)
ADO	0.389707	1.00191	up (Toledo)
OR13A1	0	1.11678	up (Toledo)
ALOX5	0	1.25321	up (Toledo)
NUP93	0.379943	1.07826	up (Toledo)
ZKSCAN8	0.358951	1.86999	up (Toledo)
CLPX	0.390515	1.47322	up (Toledo)
EGR2	1.58215	-1.93054	up (OCI-LY19)
MRPS12	0.383982	1.81575	up (Toledo)
SLC29A3	1.82951	-0.10721	up (OCI-LY19)
FEM1B	0.34506	1.19163	up (Toledo)
CTRL	0.39581	4.8644	up (Toledo)
FUT11	1.1448	0.322759	up (OCI-LY19)
GNB2	0.371175	1.38296	up (Toledo)
RDH14	0.375066	2.53823	up (Toledo)
PSKH1	0.356761	1.18219	up (Toledo)
KLLN	-1.18232	-2.35268	down (both)
NKIRAS2	0.353165	1.07888	up (Toledo)
IFIT5	0.0326379	1.57664	up (Toledo)
PANK1	-1.45892	1.08225	up (Toledo)
ABT1	0.335676	1.20726	up (Toledo)
IP6K1	0.331759	1.1062	up (Toledo)
CYB5R1	0.360987	1.91131	up (Toledo)
UBTD1	1.21511	-0.133624	up (OCI-LY19)
MORN4	0	1.05674	up (Toledo)
PYROXD2	0.135535	1.15716	up (Toledo)
RNASEH2C	0.317019	1.13059	up (Toledo)
LZTS2	-0.0848461	1.76105	up (Toledo)
KAZALD1	-0.823276	1.82067	up (Toledo)
GAPDH	0.302231	1.13006	up (Toledo)
CALHM2	0.110886	1.43415	up (Toledo)
RBFA	0.302656	1.39512	up (Toledo)
DUSP5	0	1.75633	up (Toledo)
AMPD2	0.302219	2.02497	up (Toledo)
ADRB1	0	2.94171	up (Toledo)
GYPC	0.296384	2.7975	up (Toledo)
MAP4K2	0.320632	1.98441	up (Toledo)
TCL1B	0.293028	1.04208	up (Toledo)
DDB1	0.29119	1.13179	up (Toledo)
MRPL30	0.299766	1.32059	up (Toledo)
BCKDK	0.314422	1.30192	up (Toledo)
ABHD15	0.301517	2.91197	up (Toledo)
TACC2	1.39649	0	up (OCI-LY19)
PSTK	0.331944	1.47172	up (Toledo)
PRKCSH	0.305579	1.10749	up (Toledo)
BRF2	0.299602	1.48101	up (Toledo)
DCTN5	0.258575	1.55105	up (Toledo)
ASAH1	0.308307	1.07302	up (Toledo)
PAOX	-1.01327	-1.52338	down (both)
IFITM3	1.06543	0.575577	up (OCI-LY19)
LMNTD2	0.747308	1.25955	up (Toledo)
RASSF7	-0.925478	2.42061	up (Toledo)
TMEM80	0.000638346	3.80031	up (Toledo)
CEND1	0	2.55125	up (Toledo)
ZNF580	0.280244	1.35306	up (Toledo)
ALDOC	0.299945	2.37921	up (Toledo)
DUSP8	0.901206	1.77729	up (Toledo)
IFITM10	0.150145	1.54809	up (Toledo)
CDKN1C	0	5.04127	up (Toledo)
PHLDA2	2.49644	3.48071	up (both)
USF2	0.26205	1.03174	up (Toledo)
CHRNA10	-1.90727	2.01998	up (Toledo)
EMC10	0.293755	1.64642	up (Toledo)
APBB1	0.140293	1.46549	up (Toledo)
ATP6V0E2	0.265726	1.99669	up (Toledo)
PPCS	0.258513	1.05191	up (Toledo)
COMMD9	0.269476	1.37014	up (Toledo)
AGBL5	0.248123	1.01391	up (Toledo)
CALCB	1.57186	2.44734	up (both)
ZBTB4	0.248157	1.18907	up (Toledo)
ANAPC15	0.268711	4.02731	up (Toledo)
SH3BP5L	0.259713	1.31538	up (Toledo)
CDC42	0.240909	1.23888	up (Toledo)
HTATIP2	-0.338873	1.64695	up (Toledo)
DCAF11	0.238389	1.63259	up (Toledo)
ZFAND2A	0.282175	1.14337	up (Toledo)
KANK2	0.23683	1.15176	up (Toledo)
AK3	0.233362	1.16145	up (Toledo)
RAG2	-0.8134	2.89926	up (Toledo)
CEBPD	0.224474	4.73017	up (Toledo)
MRPL21	0.229019	1.1419	up (Toledo)
C11orf96	0.38552	3.42521	up (Toledo)
CD82	1.34618	-1.00446	up (OCI-LY19)
TP53I11	-0.0662526	1.37815	up (Toledo)
PACSIN3	-1.16301	-1.3814	down (both)
ACP2	-0.720235	3.08665	up (Toledo)
RAPSN	1.06732	0	up (OCI-LY19)
MYD88	0.23218	1.17675	up (Toledo)
PRG2	1.74344	0.739677	up (OCI-LY19)
MS4A6A	2.10789	0	up (OCI-LY19)
STK24	0.205746	1.09754	up (Toledo)
SLC15A3	2.03052	-0.335064	up (OCI-LY19)
TKFC	0.0491938	1.60782	up (Toledo)
PPP1R32	1.44263	-0.0630833	up (OCI-LY19)
RNF187	0.204721	1.22297	up (Toledo)
BCL2L11	0.205213	1.81925	up (Toledo)
TMEM129	0.211869	2.20786	up (Toledo)
ASRGL1	-0.317416	1.03185	up (Toledo)
DYRK2	0.194394	1.55801	up (Toledo)
NOA1	0.201833	1.51196	up (Toledo)
MAZ	0.195211	1.11227	up (Toledo)
SPRYD7	0.218003	1.36547	up (Toledo)
ZNF419	0.191181	1.19073	up (Toledo)
PPP2R5B	0.0700258	1.25129	up (Toledo)
HECTD3	0.215792	1.18128	up (Toledo)
IMP4	0.200994	1.20965	up (Toledo)
TMEM262	1.747	0	up (OCI-LY19)
NCOA5	0.200654	1.53324	up (Toledo)
ZNHIT2	1.04797	1.81832	up (both)
FAM8A1	0.198994	1.40767	up (Toledo)
CDC42EP2	2.11036	-0.357706	up (OCI-LY19)
SLC25A45	-0.867036	1.24048	up (Toledo)
DNAJB12	0.192803	1.51167	up (Toledo)
MAP3K11	-0.469617	2.10037	up (Toledo)
SIPA1	0.150792	1.40239	up (Toledo)
SNX32	0	1.09653	up (Toledo)
CCDC85B	-0.390927	1.40042	up (Toledo)
TMSB4X	0.168758	1.05152	up (Toledo)
KLC2	-1.37867	2.24463	up (Toledo)
UROD	0.189278	1.81749	up (Toledo)
SSBP4	0.180385	1.73594	up (Toledo)
CTSF	-0.773402	1.24467	up (Toledo)
TMEM218	0.185592	1.19322	up (Toledo)
LRRC61	0.182141	1.37703	up (Toledo)
RCE1	-0.59504	3.02627	up (Toledo)
POLD4	0.00100719	2.47003	up (Toledo)
ASB1	0.168581	1.43249	up (Toledo)
CARNS1	0.408161	3.10004	up (Toledo)
ISYNA1	0.170385	1.5088	up (Toledo)
IGHMBP2	-1.15347	1.39113	up (Toledo)
FOXK1	0.153237	1.07479	up (Toledo)
CTTN	1.44715	1.10242	up (both)
IL18BP	1.47574	0	up (OCI-LY19)
RELT	-1.28661	1.57901	up (Toledo)
UCP3	-1.19997	-1.03222	down (both)
LIPT2	1.4303	-3.9281	up (OCI-LY19)
YIPF3	0.168908	1.41379	up (Toledo)
LRRC32	1.32754	0	up (OCI-LY19)
PATZ1	0.151946	1.52454	up (Toledo)
NFE2L3	0.161632	1.1754	up (Toledo)
KLF16	0.158193	2.12347	up (Toledo)
CYTH2	0.154615	1.04019	up (Toledo)
TPI1	0.14432	1.09554	up (Toledo)
DEXI	0.167773	2.00645	up (Toledo)
EIF4B	0.137531	1.24334	up (Toledo)
SDHC	0.139616	1.45409	up (Toledo)
POLR1E	0.150589	1.46522	up (Toledo)
AKIRIN1	0.135138	1.16861	up (Toledo)
TBCB	0.129763	1.14798	up (Toledo)
C11orf71	0.315032	1.22292	up (Toledo)
FAM20B	0.129944	1.45847	up (Toledo)
NLRX1	0.262509	1.05892	up (Toledo)
LENG1	0.157327	2.26343	up (Toledo)
ZNF579	0.146229	1.30516	up (Toledo)
TIRAP	-1.34301	1.11625	up (Toledo)
B3GALT6	0.126047	1.01363	up (Toledo)
DCP1B	-0.635461	1.32716	up (Toledo)
SOD2	0.101949	1.28688	up (Toledo)
ACRBP	-1.00364	-1.37457	down (both)
UBE2R2	0.0970612	1.16365	up (Toledo)
PIANP	-0.107712	2.0537	up (Toledo)
PTMS	-2.62475	1.68999	up (Toledo)
PSMD9	0.102011	1.19782	up (Toledo)
LRRC23	0.742851	1.46356	up (Toledo)
ATN1	-1.87887	1.17488	up (Toledo)
PTPN6	0.825288	2.1384	up (Toledo)
C1S	0.536747	1.44236	up (Toledo)
CD163L1	1.54126	0.219753	up (OCI-LY19)
CLEC4A	1.53875	0	up (OCI-LY19)
CLEC4E	1.48071	0	up (OCI-LY19)
RNF26	0.108624	3.1818	up (Toledo)
RILPL2	0.109345	1.2114	up (Toledo)
GABARAPL1	1.02489	-3.15566	up (OCI-LY19)
TAS2R13	-3.21688	1.36954	up (Toledo)
TAS2R20	-0.238549	2.04023	up (Toledo)
TAS2R19	-1.34593	-2.02249	down (both)
TAS2R30	-1.5841	3.64697	up (Toledo)
DUSP14	0.107666	1.10225	up (Toledo)
JKAMP	0.121688	1.80152	up (Toledo)
TMEM186	0.107736	2.91791	up (Toledo)
MRPS24	0.0795049	1.535	up (Toledo)
BHLHE41	0	1.3523	up (Toledo)
SURF1	0.119828	1.23904	up (Toledo)
CPSF4	0.0833804	1.33296	up (Toledo)
RCL1	0.077024	1.05063	up (Toledo)
RELA	0.068556	1.32019	up (Toledo)
ZNF641	-0.488506	1.95457	up (Toledo)
JUP	0.0654617	1.05031	up (Toledo)
DDN	0.337885	2.99127	up (Toledo)
GM2A	0.0687896	1.47051	up (Toledo)
TMEM14C	0.0613187	1.24691	up (Toledo)
CDKN2D	0.0917078	1.76452	up (Toledo)
MRPL43	0.0586334	1.22456	up (Toledo)
CSAD	-1.47855	1.2889	up (Toledo)
MBD6	0.0612268	3.71528	up (Toledo)
HOXC11	1.06929	0.895941	up (OCI-LY19)
SMUG1	-0.394448	2.11277	up (Toledo)
NFE2	1.52959	0	up (OCI-LY19)
ITGA5	1.72281	0	up (OCI-LY19)
MXD3	0.0468024	3.54126	up (Toledo)
PFN1	0.0435314	1.27321	up (Toledo)
IKZF4	-0.407168	1.38488	up (Toledo)
ZC3H10	-0.327909	1.0134	up (Toledo)
COQ10A	-0.231108	3.23904	up (Toledo)
SARM1	0.0652016	1.34424	up (Toledo)
GDI2	0.0355366	1.01247	up (Toledo)
NDUFA4L2	-1.51818	1.77969	up (Toledo)
GLI1	-0.505096	1.28822	up (Toledo)
DTX3	-0.284137	3.31642	up (Toledo)
AGAP2	-0.629664	1.35641	up (Toledo)
CYP27B1	-0.485381	2.27053	up (Toledo)
AVIL	-0.530523	1.73019	up (Toledo)
XPOT	-1.33693	1.21976	up (Toledo)
B4GALT3	0.0501863	1.93954	up (Toledo)
BEST3	1.92356	0.532235	up (OCI-LY19)
MRPS34	0.0283875	1.89072	up (Toledo)
IMPDH1	0.0422919	2.0765	up (Toledo)
MAP4K1	0.0444434	1.67535	up (Toledo)
BBS10	-0.740695	2.94242	up (Toledo)
CLTB	0.033982	1.03757	up (Toledo)
USP44	-0.197874	1.17014	up (Toledo)
EI24	0.014865	2.72252	up (Toledo)
PPP1R18	0.00785663	1.27123	up (Toledo)
WIZ	0.0152066	1.28478	up (Toledo)
PITHD1	0.019886	1.97975	up (Toledo)
TCP11L2	1.71245	0.0836052	up (OCI-LY19)
GPI	0.00586931	1.1369	up (Toledo)
NAGPA	0.0433909	1.28682	up (Toledo)
GTPBP1	0.0188223	2.07093	up (Toledo)
MVK	-1.19806	1.47654	up (Toledo)
SLIRP	-0.00174685	1.36081	up (Toledo)
THYN1	0.0125758	1.36942	up (Toledo)
BABAM1	0.00630817	1.07506	up (Toledo)
PPTC7	1.1855	-0.288084	up (OCI-LY19)
TCTN1	1.55288	-0.649252	up (OCI-LY19)
MFF	0.00291914	1.90824	up (Toledo)
COX20	-0.00233319	1.33115	up (Toledo)
OAS1	2.96941	0	up (OCI-LY19)
RASAL1	-0.662094	1.44823	up (Toledo)
MAP1LC3B2	-0.174311	1.80438	up (Toledo)
SLC41A3	0.00176866	1.12706	up (Toledo)
PXN	-0.957664	1.23783	up (Toledo)
PLA2G1B	1.48544	0	up (OCI-LY19)
APOBEC3C	0.00402879	1.11637	up (Toledo)
KLHL21	0.0223431	2.49876	up (Toledo)
ACADS	1.81514	1.04712	up (both)
CENPV	-0.010393	1.04795	up (Toledo)
IMP3	-0.0138185	1.62668	up (Toledo)
MGST3	-0.00685705	1.52988	up (Toledo)
DPP3	0.00106946	1.04743	up (Toledo)
HIP1R	-1.01408	-1.29799	down (both)
MOSPD3	0.0231883	2.09057	up (Toledo)
TMEM11	-0.00143766	1.32875	up (Toledo)
EIF2AK1	-0.0208164	1.08234	up (Toledo)
TCTN2	-1.01279	-1.074	down (both)
SIT1	-0.00933991	1.35257	up (Toledo)
AGPAT2	-0.0143943	2.03455	up (Toledo)
PYCARD	-0.0173093	2.85889	up (Toledo)
TUSC2	-0.0112263	1.65136	up (Toledo)
CRYL1	2.57129	0.207726	up (OCI-LY19)
NDUFA13	-0.0235897	1.28988	up (Toledo)
LATS2	1.07877	-0.230557	up (OCI-LY19)
NOC2L	-0.00788179	2.38588	up (Toledo)
CARHSP1	-0.0264364	1.25151	up (Toledo)
CAPRIN1	-0.0329673	1.07032	up (Toledo)
LRRC8A	-0.0136773	1.47155	up (Toledo)
PEX11B	-0.0144877	1.2242	up (Toledo)
ERV3-1	-0.00132287	1.4064	up (Toledo)
MYPOP	-0.0128584	2.55396	up (Toledo)
SLC25A15	-0.443609	1.38366	up (Toledo)
FUNDC2	-0.0268062	1.24528	up (Toledo)
EPSTI1	2.16829	0.269561	up (OCI-LY19)
PPP4R1	-0.0368354	1.19219	up (Toledo)
NEK3	-0.584528	1.36252	up (Toledo)
SOX12	-0.0455441	1.26756	up (Toledo)
YDJC	-0.0425502	1.30305	up (Toledo)
GNB4	-0.0436452	1.05261	up (Toledo)
UQCR10	-0.0504074	1.58106	up (Toledo)
POU4F1	-1.21378	3.46088	up (Toledo)
NHP2	-0.0564622	1.58159	up (Toledo)
ZIC5	0	1.94485	up (Toledo)
CD24	-0.0612916	1.1208	up (Toledo)
LIG4	-0.459928	1.04942	up (Toledo)
PAFAH1B3	-0.0549239	1.44574	up (Toledo)
EXOC3	-0.0366019	1.52676	up (Toledo)
BAG5	-0.0542511	1.08716	up (Toledo)
GDE1	-0.0603921	1.85404	up (Toledo)
ATP6V0C	-0.0651419	2.46083	up (Toledo)
KLHL33	0	1.30224	up (Toledo)
ICMT	-0.0291516	1.43706	up (Toledo)
ANG	0	1.54448	up (Toledo)
RNASE6	1.19081	0	up (OCI-LY19)
SYMPK	-0.0595865	1.03057	up (Toledo)
MMP14	-2.32811	-1.1224	down (both)
REM2	0.90714	1.20704	up (Toledo)
RLIM	-0.0792578	1.25776	up (Toledo)
BCL2L2	-0.975281	2.90706	up (Toledo)
RSAD1	-0.0488317	1.50474	up (Toledo)
ZNF219	-0.042586	1.87644	up (Toledo)
TAB1	-0.0389416	1.09355	up (Toledo)
HMG20B	-0.0688056	1.63675	up (Toledo)
RIPK3	0	3.01446	up (Toledo)
NYNRIN	0.0368735	1.79562	up (Toledo)
ZNF687	-0.0543458	1.34728	up (Toledo)
AP1AR	-0.0708878	1.08509	up (Toledo)
NDUFS8	-0.0733145	1.03214	up (Toledo)
PLTP	-0.0517736	1.40268	up (Toledo)
GFOD2	-0.0622545	1.24493	up (Toledo)
SH3GLB2	-0.0932827	1.1196	up (Toledo)
ARMC5	-0.0706002	2.04268	up (Toledo)
PPP1R36	1.3737	0	up (OCI-LY19)
CHURC1-FNTB	1.53922	0.351865	up (OCI-LY19)
NR2C2AP	-0.0771813	2.06442	up (Toledo)
GNL1	-0.103736	1.31524	up (Toledo)
NUCB1	-0.0964761	1.48798	up (Toledo)
MED6	-2.05425	1.35078	up (Toledo)
USP19	-0.0960237	1.87957	up (Toledo)
PPP1R11	-0.10295	2.42825	up (Toledo)
GLCCI1	-0.106822	1.04787	up (Toledo)
ACOT4	1.08523	0	up (OCI-LY19)
PNMA1	-0.181065	1.00817	up (Toledo)
RPP25L	-0.0758201	1.60111	up (Toledo)
HGSNAT	-0.111697	1.17422	up (Toledo)
CUTA	-0.116858	1.13847	up (Toledo)
ZC2HC1C	-1.31387	1.17172	up (Toledo)
ANGEL1	-0.83849	1.63528	up (Toledo)
KLF3	-0.105698	1.46471	up (Toledo)
IKZF1	-0.122257	1.28796	up (Toledo)
TOMM40L	-0.0820605	1.12376	up (Toledo)
IFI27	2.62703	0.0566161	up (OCI-LY19)
IFI27L2	3.38991	-0.100703	up (OCI-LY19)
ECSIT	-0.10794	1.5234	up (Toledo)
WDR25	2.26076	-0.103137	up (OCI-LY19)
RPUSD4	-0.135678	2.89669	up (Toledo)
ANKRD9	-2.10061	2.22711	up (Toledo)
AMN	1.03217	2.34135	up (both)
CKB	0.484547	1.10477	up (Toledo)
ZBTB42	0.60994	1.4692	up (Toledo)
FBXL15	-0.110662	3.12409	up (Toledo)
GPR132	0.506148	1.16324	up (Toledo)
TMEM121	1.57795	1.30781	up (both)
RBMXL1	-0.131926	1.39076	up (Toledo)
FLAD1	-0.130448	1.62952	up (Toledo)
ZNF747	-0.10943	2.64038	up (Toledo)
ALAD	-0.110889	1.32455	up (Toledo)
CTDNEP1	-0.154721	1.20132	up (Toledo)
GPATCH3	-0.117306	2.29297	up (Toledo)
RHOV	-0.659504	2.39956	up (Toledo)
MMGT1	-0.149701	2.0012	up (Toledo)
ITPKA	-1.34178	-1.9632	down (both)
LTK	1.23606	-1.37394	up (OCI-LY19)
MAPKBP1	-0.543683	1.33715	up (Toledo)
PPIA	-0.168518	1.29337	up (Toledo)
AAGAB	-0.157253	1.41719	up (Toledo)
LCMT2	-0.538984	1.13233	up (Toledo)
RRP36	-0.155231	1.5914	up (Toledo)
MAP1A	0.212093	1.26714	up (Toledo)
C15orf48	1.2955	0	up (OCI-LY19)
MRPS15	-0.175221	1.88838	up (Toledo)
ATP6AP1	-0.172999	1.34466	up (Toledo)
NDUFA3	-0.176493	1.08149	up (Toledo)
TPM1	-2.19524	1.078	up (Toledo)
SLC43A2	-0.118383	1.01641	up (Toledo)
RFXANK	-0.150854	2.0591	up (Toledo)
IDH3G	-0.165581	1.21648	up (Toledo)
COPS7A	-0.145062	1.8785	up (Toledo)
POLR2E	-0.189481	1.19806	up (Toledo)
ZNF598	-0.18257	1.39973	up (Toledo)
STOML1	-1.69171	-1.06301	down (both)
RPP25	-0.352048	3.32067	up (Toledo)
SCAMP5	1.52054	1.16977	up (both)
HYKK	1.06193	-0.281032	up (OCI-LY19)
BCL2A1	0.281785	1.70684	up (Toledo)
ARNT2	1.67904	0	up (OCI-LY19)
ULK3	-0.192235	1.01746	up (Toledo)
MEX3B	-1.66896	2.70095	up (Toledo)
CDC25B	-0.199739	1.48432	up (Toledo)
ATG101	-0.183658	1.97164	up (Toledo)
TMEM205	-0.192551	1.10543	up (Toledo)
SERINC2	-0.172298	1.34735	up (Toledo)
GOLGA6L4	-0.65334	1.08881	up (Toledo)
NMB	0.540337	3.30151	up (Toledo)
PFKM	-0.183412	1.43348	up (Toledo)
NCF4	-0.201938	1.2267	up (Toledo)
HAPLN3	-0.685001	1.46054	up (Toledo)
MFGE8	-1.97757	1.09663	up (Toledo)
SPSB3	-0.193767	1.37847	up (Toledo)
FURIN	-0.155956	2.38925	up (Toledo)
FES	1.03407	0	up (OCI-LY19)
WDR6	-0.20071	1.17524	up (Toledo)
RHBDF1	1.35817	0	up (OCI-LY19)
HBA1	2.0075	0	up (OCI-LY19)
PDIA2	0	2.6534	up (Toledo)
MED25	-0.177609	1.16288	up (Toledo)
NHLRC4	1.36206	1.02918	up (both)
WDR24	-0.113963	3.15851	up (Toledo)
NIPSNAP3A	-0.197929	1.56769	up (Toledo)
FAHD1	-2.08998	1.51663	up (Toledo)
TBL3	-0.390781	1.53258	up (Toledo)
SYNGR3	0	3.64858	up (Toledo)
NPW	1.35504	0	up (OCI-LY19)
RABL2A	-0.189729	1.02814	up (Toledo)
COMMD2	-0.193387	1.29427	up (Toledo)
DYNLT1	-0.219943	2.25943	up (Toledo)
CTPS1	-0.21322	1.30537	up (Toledo)
KREMEN2	0	1.52075	up (Toledo)
THOC6	-0.373645	1.40249	up (Toledo)
ZNF213	0.0886524	1.14608	up (Toledo)
SRL	0	1.64316	up (Toledo)
SP1	-0.201677	1.23629	up (Toledo)
CYP2R1	-0.215238	1.74663	up (Toledo)
GTF2H3	-0.208725	1.4768	up (Toledo)
CNP	-0.236726	1.83208	up (Toledo)
DDA1	-0.235564	1.77394	up (Toledo)
EMC8	-0.235627	1.15797	up (Toledo)
CLASRP	-0.226971	1.10235	up (Toledo)
ATOX1	-0.234287	1.13473	up (Toledo)
CAMSAP1	-0.220666	1.00863	up (Toledo)
MAPK8IP3	-0.220177	1.05204	up (Toledo)
COPS6	-0.246266	2.02877	up (Toledo)
BTBD7	-0.243112	1.05604	up (Toledo)
PASK	-0.247064	1.66315	up (Toledo)
SPNS1	-0.0975629	1.49423	up (Toledo)
MLLT6	-0.253818	1.48963	up (Toledo)
MRPS2	-0.256336	1.04631	up (Toledo)
QPRT	-1.82215	2.15298	up (Toledo)
C16orf54	2.02683	-0.602135	up (OCI-LY19)
MVP	1.10049	-0.303857	up (OCI-LY19)
GDPD3	-1.7896	3.08342	up (Toledo)
B4GALT2	-0.262992	2.14727	up (Toledo)
PRR14	-0.236517	1.48935	up (Toledo)
ORMDL2	-0.24283	1.26138	up (Toledo)
LOC730183	-1.58486	-3.8024	down (both)
TMEM265	-1.29041	-1.23114	down (both)
CMTM3	-0.263944	1.23534	up (Toledo)
PRPF38A	-0.261299	1.04354	up (Toledo)
RITA1	-0.251879	1.05919	up (Toledo)
PBDC1	-0.268926	1.18696	up (Toledo)
ATG2A	-0.231813	1.16661	up (Toledo)
CNEP1R1	-1.29866	-1.43344	down (both)
HEATR3	-0.74846	1.032	up (Toledo)
IRX5	1.44721	0	up (OCI-LY19)
MT1G	2.18328	1.84692	up (both)
MT1H	2.93745	1.24563	up (both)
SLC12A3	1.2787	0	up (OCI-LY19)
HCFC1R1	-0.268589	2.22533	up (Toledo)
CCDC102A	-0.291042	1.36924	up (Toledo)
ADGRG1	1.60621	-0.0541751	up (OCI-LY19)
EID2	-0.266093	3.01088	up (Toledo)
SLC38A7	-0.102808	1.70653	up (Toledo)
CMTM1	3.55165	0	up (OCI-LY19)
VPS72	-0.284036	1.09212	up (Toledo)
ENKD1	-0.418009	1.89123	up (Toledo)
C16orf86	1.24101	0	up (OCI-LY19)
LIX1L	-0.271131	1.03041	up (Toledo)
NRN1L	-1.30395	-2.37725	down (both)
SLC12A4	-0.648807	1.52207	up (Toledo)
SETD6	-0.286003	3.59174	up (Toledo)
PIP4K2B	-0.275569	1.01769	up (Toledo)
NUDT1	-0.288217	1.52511	up (Toledo)
ZNF668	-0.254497	1.87886	up (Toledo)
ZBTB44	-0.281412	1.16282	up (Toledo)
ZNF821	-0.656383	1.5575	up (Toledo)
ARF6	-0.28573	1.13759	up (Toledo)
CHST5	-0.482108	2.16287	up (Toledo)
TMEM231	-1.50796	1.25518	up (Toledo)
MTHFSD	-0.898281	1.2324	up (Toledo)
FOXL1	1.12644	-1.47436	up (OCI-LY19)
C16orf95	-0.84585	2.30504	up (Toledo)
SNAI3	1.69079	0	up (OCI-LY19)
TRIM26	-0.289135	1.2158	up (Toledo)
C22orf39	-0.297934	1.06855	up (Toledo)
DPEP1	1.41387	0.0647696	up (OCI-LY19)
CDCA7L	-0.307297	1.41041	up (Toledo)
TUBB3	-0.990897	1.01573	up (Toledo)
ARHGEF2	-0.308282	1.0703	up (Toledo)
HNRNPAB	-0.313458	1.57716	up (Toledo)
RILP	-0.0603404	2.69246	up (Toledo)
SERPINF1	1.13789	0	up (OCI-LY19)
NXT1	-0.311942	1.87063	up (Toledo)
CAMTA2	-0.281346	1.16921	up (Toledo)
UQCRHL	-0.321475	7.13286	up (Toledo)
CPSF7	-0.314183	1.09348	up (Toledo)
ACAP1	-0.0076108	1.19003	up (Toledo)
GYS1	-0.289054	1.32941	up (Toledo)
TMEM102	-0.407949	2.98724	up (Toledo)
ZNF646	-0.254079	1.92854	up (Toledo)
CD68	1.24224	-0.235375	up (OCI-LY19)
HES7	0.474468	2.1712	up (Toledo)
GFER	-0.293147	2.60393	up (Toledo)
MRPL4	-0.330618	1.28606	up (Toledo)
TMEM39B	-0.32043	1.58822	up (Toledo)
TRPV2	1.79253	0.634533	up (OCI-LY19)
PRPF4	-0.32808	1.12758	up (Toledo)
FLCN	-0.531363	1.12934	up (Toledo)
CCDC90B	-0.316845	1.38762	up (Toledo)
DNAJC7	-0.339821	1.46601	up (Toledo)
ATPAF2	-0.278965	1.10687	up (Toledo)
MIEF2	0.335937	1.25927	up (Toledo)
TOP3A	-1.04492	1.22995	up (Toledo)
LGALS9C	1.18436	0	up (OCI-LY19)
MFAP4	-0.579548	3.68728	up (Toledo)
ALDH3A2	-0.478993	1.04927	up (Toledo)
JMJD8	-0.342289	1.44512	up (Toledo)
NOS2	1.57665	0	up (OCI-LY19)
LYRM9	2.92456	2.02889	up (both)
CUEDC2	-0.334561	2.27451	up (Toledo)
TMEM41A	-0.32209	1.19842	up (Toledo)
SDHA	-0.329184	2.39586	up (Toledo)
RAB34	0.537053	1.5395	up (Toledo)
DNAJC16	-0.305931	1.30869	up (Toledo)
DUSP1	-0.331567	1.86977	up (Toledo)
ERAL1	-0.0888182	3.20127	up (Toledo)
DHRS13	-0.585839	1.6931	up (Toledo)
DTX3L	-0.342538	1.31024	up (Toledo)
TEFM	-1.16257	-1.01978	down (both)
CPNE1	-0.35933	1.14171	up (Toledo)
GMEB1	-0.319579	1.31706	up (Toledo)
STK11IP	-0.31365	1.80113	up (Toledo)
SLC25A39	-0.355595	1.64645	up (Toledo)
CCT6B	1.8374	0	up (OCI-LY19)
IREB2	-0.351428	1.21437	up (Toledo)
SLFN12	1.25051	0	up (OCI-LY19)
CCL3	1.93011	-3.65659	up (OCI-LY19)
CCL3L3	1.35691	0	up (OCI-LY19)
CCL4L2	1.13462	0	up (OCI-LY19)
LRRC47	-0.359278	1.21304	up (Toledo)
C17orf98	1.81377	0	up (OCI-LY19)
ING4	-0.341399	1.14408	up (Toledo)
PGAP3	1.59259	0.666175	up (OCI-LY19)
IKZF3	1.41231	0.16031	up (OCI-LY19)
THRA	0.391042	1.69043	up (Toledo)
NR1D1	1.45882	0.218749	up (OCI-LY19)
KRTAP4-12	1.09442	0	up (OCI-LY19)
P3H4	-1.69162	2.08474	up (Toledo)
PPIE	-0.3366	2.38185	up (Toledo)
SMG7	-0.358136	1.11756	up (Toledo)
GHDC	0.292528	1.73141	up (Toledo)
PRKAB1	-0.346481	1.30535	up (Toledo)
FADD	-0.364729	1.55149	up (Toledo)
TUBG2	-0.587288	1.62706	up (Toledo)
PLEKHH3	-1.19041	-1.27589	down (both)
GPX7	-0.373265	1.08625	up (Toledo)
NRN1	-0.378241	1.88746	up (Toledo)
TARBP2	-0.352993	3.57572	up (Toledo)
ARL4D	-0.567248	1.84717	up (Toledo)
CUL4B	-0.367112	1.32537	up (Toledo)
FAM171A2	0	2.80971	up (Toledo)
DBF4B	1.04361	0.239965	up (OCI-LY19)
MPG	-0.378968	1.34999	up (Toledo)
RPRML	-0.206889	7.15123	up (Toledo)
MYL4	0	1.00779	up (Toledo)
CPNE2	-0.381446	1.48055	up (Toledo)
WDR54	-0.383195	1.20064	up (Toledo)
HOXB7	-0.522885	1.37738	up (Toledo)
PDK2	-0.69708	2.65326	up (Toledo)
MFSD3	-0.365761	2.75675	up (Toledo)
DCTPP1	-0.394887	1.34335	up (Toledo)
NME2	2.14719	-0.907131	up (OCI-LY19)
WDR83	-0.383507	2.22116	up (Toledo)
FASTK	-0.385688	1.43418	up (Toledo)
C1orf56	-0.387757	3.3069	up (Toledo)
TMEM127	-0.355197	2.12332	up (Toledo)
CYB561	1.71342	0.649402	up (OCI-LY19)
ECI2	-0.39528	1.14373	up (Toledo)
ZNF395	-0.404349	1.02985	up (Toledo)
FXR2	-0.393327	1.59729	up (Toledo)
KAT8	-0.385214	2.45726	up (Toledo)
SERPINB9	-0.388494	1.12104	up (Toledo)
TTYH2	1.64507	-0.269355	up (OCI-LY19)
IDH2	-0.41407	1.01429	up (Toledo)
LSM4	-0.411831	1.67783	up (Toledo)
RECQL5	-1.56838	-1.03165	down (both)
TRIM47	0.535467	1.44509	up (Toledo)
PPP1R8	-0.406903	1.15398	up (Toledo)
OSGEP	-0.385858	1.14181	up (Toledo)
RNPEPL1	-0.368162	1.8271	up (Toledo)
TUBA8	-0.403949	2.02026	up (Toledo)
ZNF746	-0.38475	1.15784	up (Toledo)
IGBP1	-0.417734	1.18222	up (Toledo)
PEX10	-0.386956	2.62699	up (Toledo)
SGSH	2.34689	0.894711	up (OCI-LY19)
ENDOV	-0.559419	1.53866	up (Toledo)
PCYT2	-1.87935	-2.09031	down (both)
RAC3	0.657106	1.68482	up (Toledo)
UTS2R	0	2.37131	up (Toledo)
FKBP4	-0.416207	1.24792	up (Toledo)
PITRM1	-0.404208	2.06745	up (Toledo)
ARHGAP27	0	1.2575	up (Toledo)
MRPL55	-0.428524	1.65284	up (Toledo)
ZNFX1	-0.416598	1.67835	up (Toledo)
RAB31	1.19902	-0.0318668	up (OCI-LY19)
HSF2	-0.410828	1.30486	up (Toledo)
NETO2	-0.411135	1.34457	up (Toledo)
EMC1	-0.407084	1.4521	up (Toledo)
PSMA8	1.01897	0.00816351	up (OCI-LY19)
KCTD12	-0.373095	2.30674	up (Toledo)
ZNF396	0.448672	1.10624	up (Toledo)
CISD3	-0.416521	1.43989	up (Toledo)
ALDH16A1	-0.424002	1.76245	up (Toledo)
ATL3	-0.405095	1.02096	up (Toledo)
DUSP6	-0.447592	1.8413	up (Toledo)
TRIM32	-0.367774	1.10838	up (Toledo)
ANO8	-0.429076	1.54674	up (Toledo)
ADD2	-0.393336	1.23176	up (Toledo)
CTDP1	1.02024	0.891548	up (OCI-LY19)
HSBP1L1	2.55623	-1.12124	up (OCI-LY19)
MADCAM1	1.04174	0	up (OCI-LY19)
POLRMT	-0.269065	1.40728	up (Toledo)
PRSS57	1.43451	0	up (OCI-LY19)
MED16	0.0334188	1.93575	up (Toledo)
TAPBPL	-0.445737	1.06173	up (Toledo)
MEX3D	-1.1008	1.896	up (Toledo)
IZUMO4	-1.43239	2.15924	up (Toledo)
PIGC	-0.445626	1.99034	up (Toledo)
AMH	-2.49681	3.24526	up (Toledo)
GADD45B	0.38965	5.97847	up (Toledo)
SMIM24	1.6765	1.00736	up (both)
TBXA2R	2.18997	0	up (OCI-LY19)
DAPK3	-0.0882286	1.51798	up (Toledo)
PRR22	-1.06542	-1.12976	down (both)
VMAC	1.10099	0	up (OCI-LY19)
KDM5B	-0.46296	1.09539	up (Toledo)
CRB3	1.37591	0	up (OCI-LY19)
DENND1C	0.188657	1.32163	up (Toledo)
PEX11G	0	1.25369	up (Toledo)
SNAPC2	-0.347166	2.54672	up (Toledo)
CTXN1	-0.223416	4.49448	up (Toledo)
KANK3	1.95029	0	up (OCI-LY19)
GTF2H5	-0.457806	1.0118	up (Toledo)
ZNF426	-0.860507	1.89446	up (Toledo)
PPAN	0	2.16772	up (Toledo)
S1PR2	-0.76103	3.0051	up (Toledo)
ICAM5	-0.169582	1.50367	up (Toledo)
FXN	-0.430165	1.09307	up (Toledo)
EPOR	0.601539	1.67294	up (Toledo)
SF3B2	-0.487225	1.14536	up (Toledo)
ZNF440	-0.941837	1.16219	up (Toledo)
MAST1	0.09196	1.65377	up (Toledo)
SIGIRR	-0.461979	1.49773	up (Toledo)
ENDOG	-0.480791	1.63126	up (Toledo)
ATXN7L3	-0.478476	1.0216	up (Toledo)
RCN1	-0.480188	1.14271	up (Toledo)
SAMD1	-3.9105	2.15582	up (Toledo)
GIPC1	-0.721793	1.16584	up (Toledo)
OR7A5	1.53742	0	up (OCI-LY19)
IFNAR1	-0.461882	1.15907	up (Toledo)
SLC25A35	-0.481861	2.03974	up (Toledo)
OCEL1	0.560951	1.58573	up (Toledo)
FGFR1OP2	-0.479827	1.37736	up (Toledo)
CCDC124	-0.536913	1.08319	up (Toledo)
VAMP1	-0.497569	1.89271	up (Toledo)
MPV17L2	0.971415	2.49451	up (Toledo)
B4GAT1	-0.476007	3.54247	up (Toledo)
TARBP1	-0.475412	1.01798	up (Toledo)
YJEFN3	-3.72954	1.59874	up (Toledo)
PBX4	-1.62315	1.8161	up (Toledo)
LPAR2	-0.619687	2.00529	up (Toledo)
FAM76B	-0.492005	1.38363	up (Toledo)
CCNE1	-1.48813	-1.38259	down (both)
FAAP24	-1.45139	1.44931	up (Toledo)
BAHD1	-0.445925	1.39	up (Toledo)
ZNF181	-0.534935	1.26122	up (Toledo)
ZNF599	1.07729	0	up (OCI-LY19)
SLC35B2	-0.497084	1.07451	up (Toledo)
RBM42	1.09711	1.07292	up (both)
ETV2	0	2.79543	up (Toledo)
IGFLR1	-1.46904	-1.88839	down (both)
U2AF1L4	0.989091	3.5088	up (Toledo)
APLP1	0	1.77679	up (Toledo)
ZNF382	1.12255	0	up (OCI-LY19)
ZNF793	-0.1802	1.46888	up (Toledo)
NUBP2	-0.517671	1.92596	up (Toledo)
C19orf33	1.2164	0	up (OCI-LY19)
PAIP1	-0.506686	1.12059	up (Toledo)
RAG1	-0.515759	1.63165	up (Toledo)
LRFN1	-0.537365	1.48534	up (Toledo)
MMACHC	-0.530367	1.52167	up (Toledo)
PLEKHG2	-0.690756	1.88277	up (Toledo)
DLL3	0.0839392	1.05861	up (Toledo)
ASH2L	-0.513053	1.05205	up (Toledo)
PRX	0.546623	1.01979	up (Toledo)
SERTAD3	-0.197609	1.38336	up (Toledo)
NUMBL	-0.540918	1.72899	up (Toledo)
TSPAN3	-0.523747	1.41361	up (Toledo)
CEACAM21	1.91099	0	up (OCI-LY19)
SSRP1	-0.535923	1.70654	up (Toledo)
ATP1A3	0.523084	1.29186	up (Toledo)
NDE1	-0.507376	1.17812	up (Toledo)
CNFN	-0.438023	1.12836	up (Toledo)
PHLDB3	-0.882314	1.56255	up (Toledo)
ZNF575	-1.08433	-1.80894	down (both)
ZNF222	1.87261	0	up (OCI-LY19)
ZNF224	-1.09928	-1.27344	down (both)
APOC2	2.37442	0	up (OCI-LY19)
ZNF282	-0.509128	1.90565	up (Toledo)
GEMIN7	-0.969109	1.25813	up (Toledo)
BLOC1S3	1.71463	0.302457	up (OCI-LY19)
KDSR	-0.51375	1.81833	up (Toledo)
FOSB	1.63265	2.08686	up (both)
DMWD	-1.00846	1.13542	up (Toledo)
ERGIC1	-0.544899	1.16874	up (Toledo)
NIPA2	-0.526647	1.29163	up (Toledo)
RDH11	-0.539739	1.89545	up (Toledo)
CCDC9	-0.964976	2.29099	up (Toledo)
DBP	-1.87461	1.22112	up (Toledo)
BCAT2	-1.1821	1.4013	up (Toledo)
PLEKHA4	-0.784826	1.48309	up (Toledo)
LSS	-0.466089	1.43225	up (Toledo)
TM2D2	-0.520989	1.83046	up (Toledo)
TRAF6	-0.449281	2.42454	up (Toledo)
FCGRT	1.05243	0.367798	up (OCI-LY19)
PNKP	0.531649	1.64543	up (Toledo)
TBC1D17	-1.86008	-1.41915	down (both)
ZNF473	-0.580305	1.11552	up (Toledo)
SPIB	1.66818	0.0293864	up (OCI-LY19)
SHANK1	0	1.00754	up (Toledo)
CLEC11A	0.1948	3.06543	up (Toledo)
KLK1	0	1.1354	up (Toledo)
CLDND2	1.17185	2.90434	up (both)
NKG7	1.61672	0	up (OCI-LY19)
ZNF432	0.126451	2.12181	up (Toledo)
STK4	-0.538597	1.0117	up (Toledo)
ZNF888	0.0757546	1.15393	up (Toledo)
PCGF3	-0.547444	1.13981	up (Toledo)
SAP130	-0.486955	1.09041	up (Toledo)
LILRB2	1.76263	0	up (OCI-LY19)
CDC42EP5	2.59032	0	up (OCI-LY19)
TMEM86B	-1.99865	3.80825	up (Toledo)
PEF1	-0.54759	1.02229	up (Toledo)
CCDC106	-0.305398	3.4775	up (Toledo)
E2F1	-0.556195	1.96488	up (Toledo)
ZNF304	-0.130556	2.29473	up (Toledo)
ZNF416	1.01504	0.612995	up (OCI-LY19)
ZNF552	-1.28535	-1.95067	down (both)
ZNF544	-0.980434	1.67259	up (Toledo)
ZNF497	-1.25454	1.85807	up (Toledo)
ZNF584	-0.610423	1.30355	up (Toledo)
ZNF446	1.42851	-0.603256	up (OCI-LY19)
PSMB5	-0.568324	1.30665	up (Toledo)
ASCC2	-0.558313	1.03274	up (Toledo)
ORAI2	-0.555103	1.29488	up (Toledo)
GOLM1	-0.517059	1.34069	up (Toledo)
CALCOCO2	-0.568145	1.58437	up (Toledo)
TUBB	-0.586899	1.71073	up (Toledo)
FKBP1B	0.745849	1.62498	up (Toledo)
COX8A	-0.589293	1.03043	up (Toledo)
UCN	-2.66176	3.95043	up (Toledo)
CCDC121	-0.656443	1.26046	up (Toledo)
PDHB	-0.586969	1.06408	up (Toledo)
RBKS	1.67826	0	up (OCI-LY19)
FOSL2	1.66602	0	up (OCI-LY19)
PTEN	-0.56558	1.07937	up (Toledo)
LBH	-0.116405	1.76388	up (Toledo)
EHD3	2.64606	0.211352	up (OCI-LY19)
UHRF1	-0.590165	1.08532	up (Toledo)
PIN1	-0.595531	1.66459	up (Toledo)
FAM120A	-0.595414	1.0484	up (Toledo)
EPAS1	1.16082	0	up (OCI-LY19)
DNAAF5	-0.589041	1.20337	up (Toledo)
CHAC2	-1.52734	-1.82	down (both)
DCAF10	-0.565214	1.19964	up (Toledo)
PAPOLG	-0.964722	1.62495	up (Toledo)
BUD13	-0.583246	1.5889	up (Toledo)
DGCR6L	-0.598358	1.45934	up (Toledo)
GMCL1	-1.21266	1.69642	up (Toledo)
SPR	-0.578345	3.44814	up (Toledo)
SMYD5	0.351159	1.88034	up (Toledo)
NADK	-0.553179	1.86137	up (Toledo)
NME3	-0.606041	1.31803	up (Toledo)
TNPO2	-0.614149	1.88213	up (Toledo)
UBE2S	-0.629153	3.17514	up (Toledo)
VAMP5	1.14376	0	up (OCI-LY19)
TMEM150A	-0.124099	2.86592	up (Toledo)
ST3GAL5	1.24756	1.4285	up (both)
RAD9A	-0.62917	1.02947	up (Toledo)
CDCA4	-0.622951	1.38984	up (Toledo)
FAHD2A	-0.783472	1.24125	up (Toledo)
TRIM43	1.24907	0	up (OCI-LY19)
DUSP2	-0.534591	2.32025	up (Toledo)
ITPRIPL1	0.52311	1.51835	up (Toledo)
FAHD2B	0.0727388	2.43805	up (Toledo)
C2orf15	1.20174	0	up (OCI-LY19)
MTA1	-0.644311	1.54082	up (Toledo)
RFX8	1.17467	0	up (OCI-LY19)
KMT2D	-0.51736	1.03355	up (Toledo)
CHCHD5	1.68743	-0.238452	up (OCI-LY19)
BORA	-0.601427	1.37155	up (Toledo)
DHX9	-0.646007	1.28832	up (Toledo)
DXO	-0.631645	3.03006	up (Toledo)
BIN1	2.64298	0	up (OCI-LY19)
GTF3C5	-0.640588	1.17908	up (Toledo)
CCDC74A	-2.03633	1.37977	up (Toledo)
ASPHD2	-0.621358	2.7686	up (Toledo)
INO80E	-0.646645	1.31426	up (Toledo)
MOGS	-0.637792	2.34976	up (Toledo)
OS9	-0.649508	1.29588	up (Toledo)
TRIM22	-0.64248	1.23728	up (Toledo)
DAPL1	0.459003	1.89263	up (Toledo)
RNF40	-0.615312	3.08195	up (Toledo)
DHRS9	1.8038	0	up (OCI-LY19)
THAP5	-0.607818	1.2351	up (Toledo)
DLX2	1.21676	0	up (OCI-LY19)
SP9	0	3.27053	up (Toledo)
FKBP7	-0.744763	1.97158	up (Toledo)
COLGALT1	-0.665533	1.06127	up (Toledo)
EPM2AIP1	-0.648513	1.97686	up (Toledo)
NEDD1	-0.653295	1.09237	up (Toledo)
KCTD18	-0.657594	1.16579	up (Toledo)
FZD7	-1.01396	-2.3533	down (both)
SMARCD1	-0.671348	1.00055	up (Toledo)
PLEKHM3	1.16933	-0.0493803	up (OCI-LY19)
MRPL38	-0.683079	1.1244	up (Toledo)
PDPR	-0.648528	1.14236	up (Toledo)
EDEM3	-0.627808	1.10482	up (Toledo)
ZNF587B	-0.642493	1.21667	up (Toledo)
CES2	-0.656389	1.08709	up (Toledo)
TMEM97	-0.699228	2.70112	up (Toledo)
NANOS1	-0.617313	1.80752	up (Toledo)
DVL3	-0.675127	1.02987	up (Toledo)
NPPC	-1.00708	4.23278	up (Toledo)
TMEM70	-0.685266	1.02441	up (Toledo)
SDHD	-0.678523	1.77225	up (Toledo)
XPO6	-0.694172	1.10682	up (Toledo)
SAG	1.62917	0	up (OCI-LY19)
ARL4C	-1.33188	1.27534	up (Toledo)
ESPNL	0	1.12101	up (Toledo)
HES6	-1.11615	3.22259	up (Toledo)
DUSP28	-0.0898765	2.60645	up (Toledo)
WDR89	-0.665034	1.32127	up (Toledo)
NMRAL1	-0.701274	1.4371	up (Toledo)
COPS5	-0.704268	1.59268	up (Toledo)
TUBA1B	-0.724943	1.31955	up (Toledo)
LZTS3	0.427278	1.57315	up (Toledo)
ARHGAP4	-0.719131	2.07047	up (Toledo)
PLCG1	-0.626734	1.00169	up (Toledo)
LAMP5	3.5032	0.254581	up (OCI-LY19)
POLR3F	0.630363	1.32983	up (Toledo)
RBBP9	-1.32531	-2.01326	down (both)
JOSD1	-0.696727	1.3479	up (Toledo)
INSM1	0	1.63039	up (Toledo)
CD93	1.64376	0	up (OCI-LY19)
WDR18	-0.7258	1.35691	up (Toledo)
CST3	0	2.91265	up (Toledo)
NET1	-0.696476	1.6077	up (Toledo)
PLAGL2	-0.633261	1.07932	up (Toledo)
LTB4R	-0.704441	1.61375	up (Toledo)
SNTA1	-2.15711	1.66807	up (Toledo)
NECAB3	-2.10537	2.77	up (Toledo)
ACTL10	1.74254	-0.825392	up (OCI-LY19)
MAPK3	-0.715541	2.37773	up (Toledo)
PXMP4	0	1.87138	up (Toledo)
ASIP	1.03202	0	up (OCI-LY19)
KAT2A	-0.711803	1.52311	up (Toledo)
SCAMP3	-0.730025	1.10587	up (Toledo)
METTL21A	-0.645983	1.20407	up (Toledo)
GTPBP8	-0.719036	2.28242	up (Toledo)
NUDT21	-0.734263	1.56513	up (Toledo)
GRIPAP1	-0.736433	1.07313	up (Toledo)
SEPHS1	-0.734084	1.16832	up (Toledo)
PPP1R16B	1.33801	-0.00748617	up (OCI-LY19)
ARRB2	-0.745441	1.12493	up (Toledo)
FITM2	0	1.33375	up (Toledo)
TRAK1	-0.679009	1.11084	up (Toledo)
NEURL2	1.09087	0	up (OCI-LY19)
PCIF1	1.36702	-0.0749941	up (OCI-LY19)
AGO1	-0.672826	1.16798	up (Toledo)
BRAT1	-0.730672	1.28301	up (Toledo)
ANKRD52	-0.587599	1.89346	up (Toledo)
PARD6B	0.135827	1.42056	up (Toledo)
ABHD17A	-0.735849	1.27705	up (Toledo)
FAM209B	1.70334	0	up (OCI-LY19)
ZBP1	0	1.73134	up (Toledo)
CTSZ	2.17813	-0.687801	up (OCI-LY19)
SMIM10L1	-0.719071	1.64005	up (Toledo)
CABLES2	-1.26578	1.31717	up (Toledo)
ERCC3	-0.744602	1.4129	up (Toledo)
KCNQ2	1.40983	-0.0596268	up (OCI-LY19)
STMN3	-0.958332	1.26557	up (Toledo)
ZXDC	-0.682444	1.56271	up (Toledo)
TFDP1	-0.763181	1.23621	up (Toledo)
TCEA2	-0.720553	1.29255	up (Toledo)
MBTPS1	-0.75196	1.05494	up (Toledo)
SLC2A4RG	-0.76364	1.30653	up (Toledo)
LSM14B	-0.765134	1.21437	up (Toledo)
C11orf98	-0.785411	3.38362	up (Toledo)
GAK	-0.772289	1.28305	up (Toledo)
MX2	1.93857	0.0191254	up (OCI-LY19)
ZCCHC17	-0.776747	1.13129	up (Toledo)
OTUD4	-0.751491	1.28375	up (Toledo)
UMODL1	1.44934	0.873857	up (OCI-LY19)
TFF3	0	1.77588	up (Toledo)
EIF4EBP2	-0.754231	1.42301	up (Toledo)
FAM216A	-0.787878	1.36405	up (Toledo)
RPA2	-0.773935	1.16284	up (Toledo)
YBEY	0.884716	1.11636	up (Toledo)
NFATC3	-0.784448	1.43092	up (Toledo)
MED31	-0.778585	3.00901	up (Toledo)
ZSCAN29	-0.764657	1.47674	up (Toledo)
POLD2	-0.796487	1.06329	up (Toledo)
CDCA7	-0.799424	1.11272	up (Toledo)
ZNF280B	1.11724	0.783941	up (OCI-LY19)
DERL3	-0.949275	1.05546	up (Toledo)
ACD	-0.791709	1.75624	up (Toledo)
GGT5	1.22603	0	up (OCI-LY19)
IFRD2	-0.794797	1.63417	up (Toledo)
SCRIB	-0.759656	1.23908	up (Toledo)
FLVCR1	-0.720243	1.28938	up (Toledo)
KREMEN1	0	1.09521	up (Toledo)
EMID1	1.14236	0	up (OCI-LY19)
OSM	1.90468	-0.99189	up (OCI-LY19)
TBC1D10A	-0.429938	1.04414	up (Toledo)
TIMM50	-0.797	1.73292	up (Toledo)
INPP5J	0.596091	1.75311	up (Toledo)
MLLT11	-0.803957	1.02803	up (Toledo)
FADS3	-0.811802	1.0817	up (Toledo)
LGALS1	1.1201	0.019137	up (OCI-LY19)
KCTD5	-0.800267	1.16901	up (Toledo)
SLC35A4	-0.764841	1.9089	up (Toledo)
PICK1	2.25078	0	up (OCI-LY19)
MYBL2	-0.82217	1.17633	up (Toledo)
DNAL4	1.61418	1.24212	up (both)
FAM177A1	-0.755593	1.24697	up (Toledo)
INPPL1	-0.806294	1.56745	up (Toledo)
DENND6A	-0.771992	1.18375	up (Toledo)
TMEM223	-0.831869	1.45107	up (Toledo)
TNFRSF13C	-1.42897	1.61192	up (Toledo)
SERHL2	1.24588	-0.619718	up (OCI-LY19)
MCAT	-0.224426	1.39205	up (Toledo)
TOE1	-0.819629	2.3158	up (Toledo)
RNF31	-0.768643	1.15246	up (Toledo)
POLR3A	-0.770917	1.21008	up (Toledo)
KLHDC7B	-0.474813	1.06774	up (Toledo)
CPSF1	-0.833109	1.05891	up (Toledo)
BHLHE40	1.86575	-0.843305	up (OCI-LY19)
LMCD1	0	1.85915	up (Toledo)
GGCX	-0.83972	1.24281	up (Toledo)
FANCD2OS	1.15306	0	up (OCI-LY19)
ALG10B	-0.634382	1.75998	up (Toledo)
ZNF195	-0.841831	1.27435	up (Toledo)
SMNDC1	-0.857181	1.21578	up (Toledo)
IFFO1	-0.830838	1.01833	up (Toledo)
ARAP1	-0.794968	1.07494	up (Toledo)
TNFAIP8L1	-0.814964	1.33934	up (Toledo)
CFAP20	-0.863115	2.11308	up (Toledo)
TMPPE	1.30532	-1.16264	up (OCI-LY19)
RUNDC1	-0.815443	1.46158	up (Toledo)
FANCG	-0.844486	1.70007	up (Toledo)
PLCD1	0.642351	1.4829	up (Toledo)
RRP1B	-0.860916	1.05062	up (Toledo)
MMD	-0.828055	1.61356	up (Toledo)
C1orf52	-0.843016	1.76484	up (Toledo)
LONRF1	-0.857407	1.00072	up (Toledo)
ZNF619	1.32115	-0.654502	up (OCI-LY19)
DNTT	-0.877122	3.69822	up (Toledo)
ZBTB47	0.607303	1.69679	up (Toledo)
PGP	-0.856415	1.16846	up (Toledo)
MYEF2	-0.816179	1.03346	up (Toledo)
CCR1	1.14806	0	up (OCI-LY19)
CSPG5	0.304871	3.00576	up (Toledo)
COMMD4	-0.864736	1.66404	up (Toledo)
CCDC51	0.0370815	1.57478	up (Toledo)
PRKAR2A	0.364708	1.405	up (Toledo)
ARIH2OS	-1.11008	-3.44319	down (both)
GPN3	-0.860646	1.38797	up (Toledo)
EML3	-0.852292	2.26049	up (Toledo)
NICN1	0.118973	1.46737	up (Toledo)
AMIGO3	-1.03429	2.19703	up (Toledo)
PTOV1	-0.887054	1.29959	up (Toledo)
ARHGEF39	-0.83795	2.00973	up (Toledo)
HYAL2	-1.25315	1.47193	up (Toledo)
CYB561D2	-0.484145	1.94763	up (Toledo)
TMEM115	0.372409	1.68807	up (Toledo)
HEMK1	-1.03373	1.73552	up (Toledo)
TEX264	-0.664678	1.03163	up (Toledo)
TLR9	0.689673	1.94707	up (Toledo)
PPM1M	0.203734	1.4074	up (Toledo)
TMEM18	-0.898079	1.31135	up (Toledo)
ACAT2	-0.909416	1.77332	up (Toledo)
MAT2A	-0.904914	2.22534	up (Toledo)
MCM2	-0.904737	1.19656	up (Toledo)
VKORC1	-0.910176	1.04057	up (Toledo)
PTPRG	1.1128	0.0367955	up (OCI-LY19)
ATG12	-0.875837	1.02688	up (Toledo)
SP4	-0.797775	1.1138	up (Toledo)
GEMIN4	-0.881559	1.13446	up (Toledo)
DAXX	-0.912305	1.26929	up (Toledo)
CAD	-0.868692	1.58808	up (Toledo)
AEBP1	-0.911715	1.32049	up (Toledo)
WDR13	-0.881304	1.24753	up (Toledo)
IMMP1L	-0.94055	1.50365	up (Toledo)
PARP14	-0.923807	1.62152	up (Toledo)
NABP2	-0.939134	1.90581	up (Toledo)
ACTN4	-0.943359	1.08217	up (Toledo)
BRICD5	-0.943387	2.07686	up (Toledo)
CPT2	-0.910136	1.20762	up (Toledo)
MRPL46	-0.950662	1.35979	up (Toledo)
PKN3	-0.909942	1.09257	up (Toledo)
PSMG1	-0.957911	1.17744	up (Toledo)
CCDC28B	-0.949087	3.86283	up (Toledo)
EXOSC2	-0.939256	1.12756	up (Toledo)
P2RY14	1.87958	0	up (OCI-LY19)
TRMT1	-0.944154	1.17158	up (Toledo)
SLBP	-0.959347	2.11081	up (Toledo)
LXN	1.35974	0	up (OCI-LY19)
SDHB	-0.972979	1.0586	up (Toledo)
TTC14	-1.3746	-1.01137	down (both)
ZNF101	-0.94028	1.09309	up (Toledo)
PDZD11	-0.970777	1.02646	up (Toledo)
BCL11A	-0.968002	1.33668	up (Toledo)
ECE2	1.1549	0	up (OCI-LY19)
FOXM1	-0.970532	1.24887	up (Toledo)
APOD	1.57533	0	up (OCI-LY19)
CEP19	-1.99496	2.21173	up (Toledo)
UBL4A	-0.975503	1.06056	up (Toledo)
FGFRL1	-0.599681	1.22099	up (Toledo)
NCAPH2	-0.985347	1.37384	up (Toledo)
NISCH	-0.921708	1.12005	up (Toledo)
TMEM128	1.81984	2.10609	up (both)
UBTF	-0.991805	1.14451	up (Toledo)
ZBTB49	-1.12366	2.62445	up (Toledo)
NSG1	-0.931097	2.78894	up (Toledo)
KIF2A	-1.00015	1.02921	up (Toledo)
NKX3-2	0	1.2853	up (Toledo)
BST1	1.24753	0	up (OCI-LY19)
ADGRA3	1.07749	-0.0765711	up (OCI-LY19)
METTL5	-1.02476	1.05688	up (Toledo)
UBA7	-0.967886	2.47149	up (Toledo)
RELL1	1.15765	0.0609907	up (OCI-LY19)
MCM7	-1.02116	1.38615	up (Toledo)
COMMD8	1.89821	0.434856	up (OCI-LY19)
SLC35A3	-0.895267	1.56644	up (Toledo)
CEBPZ	-1.03102	-1.7198	down (both)
THOP1	-1.02945	1.03062	up (Toledo)
RASGRP2	-1.0338	1.3113	up (Toledo)
IDH3A	-1.01645	1.1021	up (Toledo)
CYP51A1	-1.00349	1.45135	up (Toledo)
SLC37A4	-0.960384	3.27325	up (Toledo)
FDCSP	1.0566	0	up (OCI-LY19)
CXCL8	0	3.16379	up (Toledo)
SSU72	-1.03511	1.6305	up (Toledo)
PGRMC1	-1.01868	1.85288	up (Toledo)
BMP3	1.14149	0.496179	up (OCI-LY19)
PRKG2	1.38025	0.0189885	up (OCI-LY19)
PIH1D1	-1.05226	1.40001	up (Toledo)
YPEL1	-1.01323	1.00207	up (Toledo)
THAP9	-1.29821	-1.56659	down (both)
NAP1L5	0.501346	3.07706	up (Toledo)
TIGD2	-0.66834	1.32474	up (Toledo)
SLC29A1	-1.0458	2.16572	up (Toledo)
CXXC4	0	1.13916	up (Toledo)
PCED1A	-1.04916	2.29957	up (Toledo)
TRMT2A	-1.01349	1.89729	up (Toledo)
CLCC1	-1.01757	1.29222	up (Toledo)
CDR2	-1.02138	1.0837	up (Toledo)
POGLUT1	-1.04183	2.33667	up (Toledo)
ZNF830	-1.06886	-4.0423	down (both)
ATG9A	-1.01696	-1.54658	down (both)
SPRY1	1.51181	1.06473	up (both)
PKD2	-1.06615	-1.09199	down (both)
ARHGAP27	-0.923791	1.2575	up (Toledo)
GALT	-1.09345	-1.51767	down (both)
MDH1	-1.09966	1.27389	up (Toledo)
CEP72	-0.446895	1.19391	up (Toledo)
LPCAT3	-1.06091	-1.30422	down (both)
CBX2	-1.07501	3.25704	up (Toledo)
HPS4	-1.10444	1.45231	up (Toledo)
BASP1	1.30377	0.926947	up (OCI-LY19)
RBM15	-1.08648	-1.27104	down (both)
ZNF107	-1.0762	-1.43327	down (both)
BNIP3	-1.09994	1.39424	up (Toledo)
RANGAP1	-1.09658	1.05031	up (Toledo)
NDUFA8	-1.12357	1.33655	up (Toledo)
EIF2B4	-1.09913	1.23054	up (Toledo)
LIME1	-1.09224	1.01142	up (Toledo)
GINS2	-1.12007	1.51082	up (Toledo)
ADCK2	-1.0922	1.55715	up (Toledo)
GZMK	1.46038	0	up (OCI-LY19)
CCNO	-1.2098	4.14637	up (Toledo)
AKR1B1	-1.13023	1.56663	up (Toledo)
CCAR2	-1.00255	1.2868	up (Toledo)
TIMM8A	-1.1113	1.62597	up (Toledo)
PFKP	-1.12763	2.51408	up (Toledo)
CD180	0	1.63785	up (Toledo)
PCYOX1	-1.02576	1.45005	up (Toledo)
ARAF	-1.09815	2.8159	up (Toledo)
ZNF585A	-0.941373	1.08062	up (Toledo)
MRPL32	-1.15305	2.23734	up (Toledo)
EXOSC3	-1.12776	1.35852	up (Toledo)
SLC43A3	-1.14655	1.05216	up (Toledo)
GTF2A2	-1.14699	1.07773	up (Toledo)
BTN3A1	-1.06866	-2.41652	down (both)
POLE	-1.06132	1.08346	up (Toledo)
TRMT10B	-1.10579	1.2625	up (Toledo)
PRKACA	-1.10729	1.07149	up (Toledo)
PLOD3	-1.08901	1.05587	up (Toledo)
HSPE1	-1.16635	1.02104	up (Toledo)
CDK5R1	-1.04321	1.51467	up (Toledo)
FAM174A	1.39763	0.0899062	up (OCI-LY19)
MYBBP1A	-1.12045	2.09131	up (Toledo)
DBF4	-1.1297	-1.46154	down (both)
SEC23IP	-1.04061	-1.41319	down (both)
KIF22	-1.14849	1.60004	up (Toledo)
PGGT1B	1.53358	-0.46279	up (OCI-LY19)
NUDT15	-1.14643	-1.4301	down (both)
ZBTB2	-1.11944	1.38265	up (Toledo)
MTERF2	-1.14349	-1.54589	down (both)
GDF9	2.08707	0	up (OCI-LY19)
C1orf174	-1.16681	2.39178	up (Toledo)
ELP6	-1.17584	1.77933	up (Toledo)
SLC2A8	-1.14987	-1.14525	down (both)
CATSPER3	1.02968	0	up (OCI-LY19)
CDC25C	-1.21361	1.41628	up (Toledo)
CREB3	-1.17287	-2.52152	down (both)
CHMP4A	-1.1855	-3.17657	down (both)
PROB1	0	2.08936	up (Toledo)
SPATA24	1.32859	0	up (OCI-LY19)
BCS1L	-1.17724	-1.26608	down (both)
IGIP	-0.592008	4.17035	up (Toledo)
CYSTM1	1.30891	0	up (OCI-LY19)
EIF4EBP3	0	1.8906	up (Toledo)
TBC1D10B	-1.1177	-1.32889	down (both)
PCDHB9	-0.14029	2.21711	up (Toledo)
ZBTB18	-1.13073	1.00413	up (Toledo)
DDX20	-1.16593	1.37045	up (Toledo)
ZKSCAN4	-1.13321	1.09871	up (Toledo)
HMGN3	-1.21891	1.3834	up (Toledo)
HYI	-1.20251	1.21101	up (Toledo)
SMIM3	1.15061	0	up (OCI-LY19)
IRGM	1.73206	0	up (OCI-LY19)
NPC1	-1.11405	1.19651	up (Toledo)
EHMT2	-1.20403	1.5414	up (Toledo)
FUZ	-1.18734	-1.72001	down (both)
ANKRD54	-1.18257	1.3059	up (Toledo)
KCNMB1	1.42914	0.0418077	up (OCI-LY19)
TM2D3	-1.21884	1.08629	up (Toledo)
SLC35F6	-1.1582	1.15195	up (Toledo)
AKAP1	-1.21425	-1.02183	down (both)
RHPN1	-1.12156	1.15938	up (Toledo)
DPM3	-1.25466	1.54612	up (Toledo)
TPP2	-1.21028	1.2365	up (Toledo)
RBM14	-1.15484	1.96183	up (Toledo)
FADS1	-1.23796	1.36909	up (Toledo)
PSMC3IP	-1.21907	1.72507	up (Toledo)
GPSM1	-1.23918	-1.78834	down (both)
PFKL	-1.24568	1.62454	up (Toledo)
BTNL9	0.215313	2.23675	up (Toledo)
OTULIN	-1.11697	1.12306	up (Toledo)
NQO2	0.573037	1.24004	up (Toledo)
PXDC1	1.20033	0	up (OCI-LY19)
PPP1R3G	1.16394	0	up (OCI-LY19)
CLN8	-1.1007	-1.70633	down (both)
C11orf58	-1.2672	-1.66699	down (both)
POU2AF1	-1.24002	1.18388	up (Toledo)
CYP20A1	-1.16646	1.04549	up (Toledo)
CAP2	1.49278	0.00379215	up (OCI-LY19)
ID3	-1.27705	1.35484	up (Toledo)
CDCA5	-1.24183	1.09296	up (Toledo)
MPP1	-1.25723	1.19866	up (Toledo)
DNAJC25	-1.25912	-1.07168	down (both)
PTRH2	-1.26843	-2.06855	down (both)
UBP1	-1.27037	-1.25455	down (both)
HLA-G	1.02233	0	up (OCI-LY19)
RAB3IP	-1.16362	1.3091	up (Toledo)
ZBTB1	-1.22949	-1.47605	down (both)
TRIM39	-1.5545	1.10951	up (Toledo)
ATG16L2	-1.2853	2.00739	up (Toledo)
CENPC	-1.2775	1.17247	up (Toledo)
CCHCR1	-0.801299	1.90944	up (Toledo)
MCUR1	-1.2114	1.29224	up (Toledo)
SPTAN1	-1.19553	1.22391	up (Toledo)
ATP6V1G2	1.15582	-3.26027	up (OCI-LY19)
RAD51C	-1.30548	1.11858	up (Toledo)
LTA	-0.616448	1.32329	up (Toledo)
TNF	-0.0550037	2.79159	up (Toledo)
ARL11	-1.28561	2.57573	up (Toledo)
QSER1	-1.2421	1.13877	up (Toledo)
APOM	2.43868	-1.40855	up (OCI-LY19)
C6orf47	0.573824	1.5859	up (Toledo)
PCID2	-1.28462	1.66011	up (Toledo)
HSPA1L	1.33532	1.46177	up (both)
MCM4	-1.30915	2.07427	up (Toledo)
ZBTB12	0.0939296	1.78466	up (Toledo)
PLCB3	-1.09998	2.05858	up (Toledo)
FKBPL	-1.11463	1.9937	up (Toledo)
ZNF764	-1.26924	4.36367	up (Toledo)
SRA1	-1.28525	-1.87605	down (both)
CEP95	-1.29981	-1.15949	down (both)
DUSP7	-1.24276	1.60064	up (Toledo)
HLA-DQA2	1.8673	-2.56608	up (OCI-LY19)
EVI2A	-1.31384	-2.18024	down (both)
COQ5	-1.31665	-1.70413	down (both)
ZBTB22	1.03484	0.593957	up (OCI-LY19)
ZKSCAN1	-1.30813	1.60519	up (Toledo)
SLC20A1	-1.32372	1.60089	up (Toledo)
ZNF652	-1.17035	1.00265	up (Toledo)
NRGN	-1.33223	1.34805	up (Toledo)
MAPK13	-0.279734	1.40379	up (Toledo)
PLK1	-1.33708	1.11282	up (Toledo)
UNC5CL	0.220242	1.4047	up (Toledo)
APOBEC2	1.32596	0	up (OCI-LY19)
KLHL9	-1.29865	-3.17159	down (both)
PDLIM7	-1.30313	1.00949	up (Toledo)
UBE2C	-1.35835	1.14709	up (Toledo)
PTCD3	-1.32748	1.39409	up (Toledo)
SP110	-1.35474	-1.39803	down (both)
ENPP5	0	1.42501	up (Toledo)
CSRP2	-1.37002	1.43203	up (Toledo)
GSTA4	1.3342	1.99089	up (both)
MSL1	-1.34822	1.36386	up (Toledo)
IRAK1BP1	1.12422	0.100112	up (OCI-LY19)
TUBG1	-1.36416	1.35287	up (Toledo)
SRSF7	-1.38777	1.2821	up (Toledo)
BTK	-1.3501	1.32995	up (Toledo)
PKMYT1	-1.38097	1.64823	up (Toledo)
GLA	-1.38159	2.15956	up (Toledo)
SEC63	-1.37123	-1.21831	down (both)
BRD1	-1.34246	1.18441	up (Toledo)
CDKN1A	-1.38026	-1.33574	down (both)
HEY2	-0.577761	1.94841	up (Toledo)
HINT3	0.360933	1.28738	up (Toledo)
C2orf68	-1.35734	3.69909	up (Toledo)
SLC18B1	1.26887	0.461493	up (OCI-LY19)
IGFBP4	-1.39549	-2.01072	down (both)
PDE7B	1.26126	0	up (OCI-LY19)
IFNGR1	-1.43216	-1.57615	down (both)
SLC35B4	-1.31778	1.12556	up (Toledo)
PERP	0.389052	1.67836	up (Toledo)
TRMT5	-1.37147	-1.45043	down (both)
ACAT1	-1.40051	1.1518	up (Toledo)
RANBP9	-1.39066	1.04494	up (Toledo)
BTBD6	-1.38173	2.03885	up (Toledo)
ZC2HC1B	1.87404	0	up (OCI-LY19)
PHPT1	-1.42502	-1.07724	down (both)
BTN2A2	-1.35444	-2.37387	down (both)
GEMIN2	-1.41562	-1.01876	down (both)
AP1G2	-1.39762	1.40891	up (Toledo)
AZI2	-1.35743	1.31159	up (Toledo)
PPP1R14C	1.13782	0.259724	up (OCI-LY19)
ENO2	-1.36394	2.3835	up (Toledo)
SYNJ2	1.31835	-0.186007	up (OCI-LY19)
BAG2	-1.40578	-1.83205	down (both)
TM7SF3	-1.40987	1.67492	up (Toledo)
CEP131	-1.33871	1.15912	up (Toledo)
FHOD1	-1.32084	-1.5787	down (both)
AASDH	-1.35871	-1.27472	down (both)
DLL1	-0.577886	1.78035	up (Toledo)
PPP1R11	0	2.42825	up (Toledo)
TRIM26	0	1.2158	up (Toledo)
TRIM39	0	1.10951	up (Toledo)
GNL1	0	1.31524	up (Toledo)
PPP1R18	0	1.27123	up (Toledo)
TUBB	0	1.71073	up (Toledo)
TNF	0	2.79159	up (Toledo)
HSPA1L	0	1.46177	up (Toledo)
HSPA1B	0	1.93633	up (Toledo)
EHMT2	0	1.5414	up (Toledo)
PPT2	0	1.80815	up (Toledo)
PPP1R11	0	2.42825	up (Toledo)
TRIM26	0	1.2158	up (Toledo)
TRIM39	0	1.10951	up (Toledo)
GNL1	0	1.31524	up (Toledo)
PPP1R18	0	1.27123	up (Toledo)
TUBB	0	1.71073	up (Toledo)
CCHCR1	0	1.90944	up (Toledo)
LTA	0	1.32329	up (Toledo)
TNF	0	2.79159	up (Toledo)
AIF1	0	1.86633	up (Toledo)
C6orf47	0	1.5859	up (Toledo)
HSPA1L	0	1.46177	up (Toledo)
HSPA1B	0	1.93633	up (Toledo)
EHMT2	0	1.5414	up (Toledo)
ZBTB12	0	1.78466	up (Toledo)
DXO	0	3.03006	up (Toledo)
FKBPL	0	1.9937	up (Toledo)
PPT2	0	1.80815	up (Toledo)
DAXX	0	1.26929	up (Toledo)
PPP1R11	0	2.42825	up (Toledo)
TRIM26	0	1.2158	up (Toledo)
TRIM39	0	1.10951	up (Toledo)
GNL1	0	1.31524	up (Toledo)
PPP1R18	0	1.27123	up (Toledo)
TUBB	0	1.71073	up (Toledo)
CCHCR1	0	1.90944	up (Toledo)
LTA	0	1.32329	up (Toledo)
TNF	0	2.79159	up (Toledo)
AIF1	0	1.86633	up (Toledo)
C6orf47	0	1.5859	up (Toledo)
HSPA1L	0	1.46177	up (Toledo)
HSPA1B	0	1.93633	up (Toledo)
EHMT2	0	1.5414	up (Toledo)
ZBTB12	0	1.78466	up (Toledo)
DXO	0	3.03006	up (Toledo)
FKBPL	0	1.9937	up (Toledo)
PPT2	0	1.80815	up (Toledo)
DAXX	0	1.26929	up (Toledo)
PPP1R11	0	2.42825	up (Toledo)
TRIM26	0	1.2158	up (Toledo)
TRIM39	0	1.10951	up (Toledo)
GNL1	0	1.31524	up (Toledo)
PPP1R18	0	1.27123	up (Toledo)
TUBB	0	1.71073	up (Toledo)
CCHCR1	0	1.90944	up (Toledo)
LTA	0	1.32329	up (Toledo)
TNF	0	2.79159	up (Toledo)
C6orf47	0	1.5859	up (Toledo)
PPT2	0	1.80815	up (Toledo)
PPP1R11	0	2.42825	up (Toledo)
TRIM26	0	1.2158	up (Toledo)
GNL1	0	1.31524	up (Toledo)
PPP1R18	0	1.27123	up (Toledo)
TUBB	0	1.71073	up (Toledo)
CCHCR1	0	1.90944	up (Toledo)
LTA	0	1.32329	up (Toledo)
TNF	0	2.79159	up (Toledo)
AIF1	0	1.86633	up (Toledo)
C6orf47	0	1.5859	up (Toledo)
EHMT2	0	1.5414	up (Toledo)
ZBTB12	0	1.78466	up (Toledo)
DXO	0	3.03006	up (Toledo)
FKBPL	0	1.9937	up (Toledo)
PPT2	0	1.80815	up (Toledo)
DAXX	0	1.26929	up (Toledo)
PPP1R11	0	2.42825	up (Toledo)
TRIM26	0	1.2158	up (Toledo)
TRIM39	0	1.10951	up (Toledo)
GNL1	0	1.31524	up (Toledo)
PPP1R18	0	1.27123	up (Toledo)
TUBB	0	1.71073	up (Toledo)
CCHCR1	0	1.90944	up (Toledo)
LTA	0	1.32329	up (Toledo)
TNF	0	2.79159	up (Toledo)
AIF1	0	1.86633	up (Toledo)
C6orf47	0	1.5859	up (Toledo)
HSPA1L	0	1.46177	up (Toledo)
HSPA1B	0	1.93633	up (Toledo)
EHMT2	0	1.5414	up (Toledo)
ZBTB12	0	1.78466	up (Toledo)
DXO	0	3.03006	up (Toledo)
PPT2	0	1.80815	up (Toledo)
DAXX	0	1.26929	up (Toledo)
KIFC1	0	1.63156	up (Toledo)
PPP1R11	0	2.42825	up (Toledo)
TRIM26	0	1.2158	up (Toledo)
TRIM39	0	1.10951	up (Toledo)
GNL1	0	1.31524	up (Toledo)
PPP1R18	0	1.27123	up (Toledo)
TUBB	0	1.71073	up (Toledo)
LTA	0	1.32329	up (Toledo)
TNF	0	2.79159	up (Toledo)
AIF1	0	1.86633	up (Toledo)
C6orf47	0	1.5859	up (Toledo)
EHMT2	0	1.5414	up (Toledo)
DXO	0	3.03006	up (Toledo)
PPT2	0	1.80815	up (Toledo)
KIFC1	0	1.63156	up (Toledo)
CUTA	0	1.13847	up (Toledo)
ANKRD61	-1.49182	-1.23572	down (both)
FKBP2	-1.47679	1.7109	up (Toledo)
AKIP1	-1.44884	1.26132	up (Toledo)
ICA1	1.76932	0	up (OCI-LY19)
ZNF587	-1.37553	1.15152	up (Toledo)
ANKRD13B	-1.4027	1.13667	up (Toledo)
CCDC174	-1.47049	-1.07299	down (both)
DFFB	-1.40391	1.19924	up (Toledo)
HOXA1	0.291131	2.9276	up (Toledo)
HOXA4	-0.330112	2.76673	up (Toledo)
PEX6	-1.39231	1.42536	up (Toledo)
AOAH	1.59556	0	up (OCI-LY19)
C7orf25	-1.08845	-2.08093	down (both)
HADH	-1.49423	1.25918	up (Toledo)
POLM	-0.14602	2.62818	up (Toledo)
PET117	-1.51035	2.47506	up (Toledo)
HSP90B1	-1.515	-1.35738	down (both)
HUS1	-0.846807	1.30627	up (Toledo)
UPP1	0.208675	1.95997	up (Toledo)
PRR11	-1.49722	1.42416	up (Toledo)
ISOC1	-1.48297	1.24509	up (Toledo)
KIF20A	-1.48227	1.74164	up (Toledo)
GPR180	-1.19363	1.06239	up (Toledo)
GTF2H2C	-1.52013	-1.0884	down (both)
ZNF430	-1.49845	-1.5704	down (both)
BIRC5	-1.53326	1.70378	up (Toledo)
CENPQ	-1.53568	-1.02141	down (both)
DNAJC30	0.668068	2.5898	up (Toledo)
NUP62	-1.53795	2.09583	up (Toledo)
ARFGAP1	-1.45926	-1.81642	down (both)
DTX2	-1.35903	1.14729	up (Toledo)
TMEM60	-0.790553	3.65404	up (Toledo)
SAC3D1	-1.55295	1.5982	up (Toledo)
SLC25A40	-1.05252	1.09195	up (Toledo)
RABL6	-1.55273	1.38837	up (Toledo)
NTHL1	-1.58158	1.38594	up (Toledo)
FAM200A	-1.2578	-1.62144	down (both)
SREBF1	-1.44524	2.0496	up (Toledo)
RUSC1	-1.39024	1.76397	up (Toledo)
MBLAC1	0.500795	1.93593	up (Toledo)
ZNF445	-1.41751	1.07864	up (Toledo)
ARID4B	-1.58137	-1.01139	down (both)
PCOLCE	-0.974039	1.81866	up (Toledo)
PAK1IP1	-1.60258	-1.09302	down (both)
OIP5	-1.60651	1.2651	up (Toledo)
CLDN15	-1.15672	-1.06344	down (both)
IFT22	0.575767	1.38238	up (Toledo)
POLD1	-1.47078	1.42217	up (Toledo)
OSBPL7	-1.44154	3.00736	up (Toledo)
LENG8	-1.57475	1.46977	up (Toledo)
RBM12B	-1.55274	-1.01049	down (both)
WDR90	-1.587	1.23294	up (Toledo)
PIGG	-1.50219	1.21841	up (Toledo)
CAV1	2.20652	-0.0609686	up (OCI-LY19)
WNT16	0.39513	1.35191	up (Toledo)
TSPAN33	1.3899	0.312738	up (OCI-LY19)
ALG8	-1.6343	1.2607	up (Toledo)
COPG2	1.12163	0.145706	up (OCI-LY19)
BTN2A1	-1.59641	-1.54883	down (both)
JADE1	-1.58858	1.4409	up (Toledo)
BPGM	-1.01337	1.93795	up (Toledo)
LUC7L2	1.19989	0	up (OCI-LY19)
PARP12	-0.313954	1.61757	up (Toledo)
ZNF439	-1.57164	1.04373	up (Toledo)
GGH	-1.6394	-1.29395	down (both)
EDRF1	-1.59232	1.25356	up (Toledo)
EPHB6	-0.356327	2.20635	up (Toledo)
TCAF2	1.13018	0	up (OCI-LY19)
CDK16	-1.55746	1.06574	up (Toledo)
UVSSA	-1.59686	1.25635	up (Toledo)
LTB	-1.68559	-3.8711	down (both)
CARS2	-1.66858	1.57917	up (Toledo)
KRBA1	-0.427931	1.64108	up (Toledo)
ZNF467	-0.35943	1.10754	up (Toledo)
ZNF775	1.12267	-0.406275	up (OCI-LY19)
GIMAP8	1.25851	1.31459	up (both)
EXOG	-1.63596	1.1341	up (Toledo)
GIMAP5	2.75348	0	up (OCI-LY19)
ABCB8	-1.021	1.69386	up (Toledo)
RAD54L	-1.66665	1.74787	up (Toledo)
KNSTRN	-1.66101	1.01649	up (Toledo)
ZNF202	-1.48895	1.65204	up (Toledo)
CDK10	-1.69534	1.87878	up (Toledo)
FAM111B	-1.6854	1.17185	up (Toledo)
DEFA3	1.58845	0	up (OCI-LY19)
U2SURP	-1.69541	-1.04128	down (both)
EXOSC8	-1.7091	-1.47048	down (both)
PDGFRL	1.31894	0	up (OCI-LY19)
TIA1	-1.69254	1.22905	up (Toledo)
LENG9	-1.70387	-1.02653	down (both)
C8orf58	1.49566	-2.54206	up (OCI-LY19)
EGR3	1.05925	0	up (OCI-LY19)
NKX3-1	1.42502	0	up (OCI-LY19)
GNRH1	-1.1353	3.53741	up (Toledo)
CEPT1	-1.7023	-1.60754	down (both)
FBXO9	-1.72371	1.36642	up (Toledo)
RBPMS	1.20121	0	up (OCI-LY19)
DPP7	-1.75528	1.29863	up (Toledo)
RAB11FIP1	-0.371197	1.04586	up (Toledo)
EXOSC9	-1.77165	-1.43731	down (both)
TMPO	-1.75595	1.1028	up (Toledo)
ZC2HC1A	-1.69323	1.01044	up (Toledo)
ZNF136	-1.66168	1.79584	up (Toledo)
CC2D1B	-1.45971	1.16486	up (Toledo)
NCAPD2	-1.75572	1.54792	up (Toledo)
INCENP	-1.71911	1.23484	up (Toledo)
HDAC10	-1.66189	1.17955	up (Toledo)
TMEM68	-1.02221	1.91478	up (Toledo)
SDAD1	-1.80825	1.09992	up (Toledo)
PRPF3	-1.81179	1.13567	up (Toledo)
C8orf44	1.86231	-1.12589	up (OCI-LY19)
RBM4B	-1.79712	1.26545	up (Toledo)
GOLGA8B	-1.78866	1.26323	up (Toledo)
LACTB2	-1.41181	1.01103	up (Toledo)
C8orf89	1.31446	0	up (OCI-LY19)
UBE2T	-1.84239	1.55592	up (Toledo)
FBXO22	-1.70133	1.00735	up (Toledo)
SLC30A5	-1.60379	-1.14062	down (both)
SLC35A5	-1.68752	-1.05957	down (both)
CPQ	2.40935	-0.0164435	up (OCI-LY19)
FADS2	-1.81079	1.04313	up (Toledo)
ZMYND8	-1.87928	1.09783	up (Toledo)
SMARCA4	-1.89135	1.09663	up (Toledo)
ZNF572	-1.00607	-1.32801	down (both)
CCDC34	-1.92055	1.01465	up (Toledo)
ZFAT	1.2645	-0.0372894	up (OCI-LY19)
NFXL1	-1.84159	-1.30191	down (both)
GPIHBP1	3.36968	0	up (OCI-LY19)
MROH6	-1.72228	1.06334	up (Toledo)
ZNF623	-0.430076	1.31388	up (Toledo)
ZNF707	-0.715016	2.29981	up (Toledo)
CCNF	-1.84935	2.2641	up (Toledo)
SCX	-1.22407	1.00867	up (Toledo)
HP1BP3	-1.95409	1.12267	up (Toledo)
TONSL	-1.38273	1.24558	up (Toledo)
PPP1R16A	-0.633184	1.72532	up (Toledo)
MPC1	-1.96367	-1.01229	down (both)
LRRC24	-0.479711	1.01659	up (Toledo)
KIFC1	-1.94006	1.63156	up (Toledo)
CCDC136	-1.68892	-1.00596	down (both)
CDT1	-1.97345	1.54217	up (Toledo)
CEP290	-1.93141	-1.08334	down (both)
GPR18	-1.97438	1.2121	up (Toledo)
SHCBP1	-1.93018	-1.68304	down (both)
HACD4	1.38726	0	up (OCI-LY19)
CDKN2A	0	1.13676	up (Toledo)
TMEM106C	-2.01163	1.87882	up (Toledo)
CDK2	-2.02739	1.35528	up (Toledo)
PPP1R3E	-1.77742	-1.43461	down (both)
DNAJB5	1.47388	1.20711	up (both)
TPM2	-1.46324	1.14994	up (Toledo)
GLIPR2	-1.0654	-1.20986	down (both)
PM20D2	-1.97039	1.19743	up (Toledo)
TRIM13	-2.0356	1.98257	up (Toledo)
CPXM1	-2.04975	-3.60541	down (both)
CKAP2L	-2.03885	1.48375	up (Toledo)
MYSM1	-1.95522	-1.39986	down (both)
ALDH1A1	1.13885	0	up (OCI-LY19)
ANXA1	1.04222	0	up (OCI-LY19)
NMRK1	-1.67586	1.74165	up (Toledo)
DEPDC1	-1.92132	1.00127	up (Toledo)
GAS1	0.159893	2.10875	up (Toledo)
CDCA8	-2.12104	1.39327	up (Toledo)
GADD45G	1.97099	1.26356	up (both)
ZNF510	-1.28491	-1.34299	down (both)
ABCB6	-2.05106	2.45116	up (Toledo)
TRIM14	1.1089	-0.100286	up (OCI-LY19)
GALNT12	0.407393	1.27278	up (Toledo)
MSANTD3-TMEFF1	4.14463	0	up (OCI-LY19)
PREPL	-1.92952	-1.17588	down (both)
SCD	-2.16567	1.4897	up (Toledo)
RNF183	0	2.1275	up (Toledo)
AMBP	0	1.01609	up (Toledo)
ORM2	2.20633	0	up (OCI-LY19)
OR1L1	0	3.75547	up (Toledo)
MPHOSPH6	-2.28426	1.71554	up (Toledo)
MCM8	-2.19335	1.35551	up (Toledo)
SNRNP48	-2.2627	1.67034	up (Toledo)
CDCA2	-2.19756	1.53463	up (Toledo)
ZCCHC8	-2.22175	-1.19175	down (both)
ZNF79	-0.963387	1.59335	up (Toledo)
TOR2A	0.126769	2.99125	up (Toledo)
SLC41A1	-2.15314	2.00127	up (Toledo)
SMARCC2	-2.27884	1.22352	up (Toledo)
NFATC2IP	-2.30713	1.88788	up (Toledo)
C9orf40	-2.29489	1.46045	up (Toledo)
POLE2	-2.25271	1.23551	up (Toledo)
CRAT	0	1.17226	up (Toledo)
IER5L	0.370558	1.95155	up (Toledo)
ATAD5	-2.30943	1.25894	up (Toledo)
DDX11	-2.22451	1.50351	up (Toledo)
TSEN54	-2.314	-3.33431	down (both)
OTUD3	-2.12661	1.3049	up (Toledo)
DNASE2	-2.31103	1.07785	up (Toledo)
LYAR	-2.41048	2.39984	up (Toledo)
CC2D1A	-2.16466	1.54033	up (Toledo)
CACFD1	-0.550645	1.35955	up (Toledo)
KIF20B	-2.41494	-1.6511	down (both)
CENPT	-2.38497	1.61762	up (Toledo)
FAM83D	-2.4103	1.70349	up (Toledo)
NPDC1	-1.64794	-1.03185	down (both)
MED19	-2.50578	1.89489	up (Toledo)
SAP25	-2.56917	1.03828	up (Toledo)
TPRN	-0.59856	1.08231	up (Toledo)
NSMF	-0.0456871	1.04492	up (Toledo)
GTPBP6	-0.633676	1.81089	up (Toledo)
MKI67	-2.49883	1.42059	up (Toledo)
SAPCD2	-2.49887	2.21494	up (Toledo)
SLFN13	-1.9573	1.61894	up (Toledo)
CCNB1	-2.53115	1.17064	up (Toledo)
CDK11A	-2.54377	1.11353	up (Toledo)
PIGA	0.062353	1.27481	up (Toledo)
PSRC1	-2.56832	3.2181	up (Toledo)
CTPS2	-0.102637	1.05854	up (Toledo)
PIDD1	-2.49829	1.95926	up (Toledo)
TRMT13	-2.54931	-1.64939	down (both)
MSANTD2	-2.58875	1.27177	up (Toledo)
MED14OS	-0.417967	2.16072	up (Toledo)
CDK11B	-2.67371	1.63814	up (Toledo)
NCAPG	-2.66244	1.10175	up (Toledo)
CDKN3	-2.76534	1.38016	up (Toledo)
HMGN5	-2.70641	1.46446	up (Toledo)
SLC26A6	-2.49276	1.5989	up (Toledo)
TIMP1	1.55222	0	up (OCI-LY19)
CENPA	-2.7145	4.44343	up (Toledo)
RCCD1	-2.67862	1.82567	up (Toledo)
PORCN	1.06248	0.3675	up (OCI-LY19)
ATAD2	-2.73996	1.19968	up (Toledo)
DNMT1	-2.79086	1.29359	up (Toledo)
FOXP3	1.05188	0	up (OCI-LY19)
ADM5	-2.74433	-2.85807	down (both)
TTC24	-2.77897	2.57807	up (Toledo)
ZXDB	-0.159329	1.61138	up (Toledo)
SPC25	-2.86273	1.10441	up (Toledo)
PIF1	-2.77367	1.26813	up (Toledo)
KLHL17	-2.72262	3.84899	up (Toledo)
TIMM21	-2.95675	1.00956	up (Toledo)
ZNF714	-2.91913	1.77467	up (Toledo)
CITED1	-0.122526	1.81096	up (Toledo)
HMX2	-2.97636	2.22819	up (Toledo)
MAGEE1	-0.293283	1.35438	up (Toledo)
NAP1L3	0	3.16887	up (Toledo)
RPA4	-1.54104	-3.54591	down (both)
TCEAL2	1.50967	0	up (OCI-LY19)
ARMCX5	0	1.36184	up (Toledo)
ZCCHC18	1.15981	-0.178945	up (OCI-LY19)
AKAP14	1.46281	0	up (OCI-LY19)
OTUD6B	-3.21368	-1.69226	down (both)
XPNPEP2	1.67671	-0.24673	up (OCI-LY19)
RAB33A	1.83596	-0.122438	up (OCI-LY19)
NAA16	-3.34309	1.04135	up (Toledo)
E2F8	-3.29063	1.61175	up (Toledo)
TCIRG1	-3.38909	-1.14551	down (both)
ENO3	-3.68213	-2.55937	down (both)
SLC6A8	-0.829202	1.79302	up (Toledo)
ABCD1	-0.155912	1.17543	up (Toledo)
DNASE1L1	1.55782	2.18025	up (both)
PLXNA3	-1.46179	1.03689	up (Toledo)
SLC10A3	-0.487018	1.67723	up (Toledo)
GTPBP6	-1.25765	1.81089	up (Toledo)

## Sheet: Table S3.
Supplementary Table 3. Gene expression changes (ΔOCI-LY19 vs ΔToledo) using non-CNS-derived cells as the reference
Symbol	delta OCI	delta Toledo	category
ISG15	-1.51649	-3.13074	down (both)
SCNN1D	0.0712225	1.62665	up (Toledo)
ACAP3	0.0922029	1.66403	up (Toledo)
PUSL1	-0.0771104	3.25636	up (Toledo)
CPTP	0.0738945	1.35341	up (Toledo)
PLAC8	-0.582979	1.47397	up (Toledo)
SLA	-1.04877	-1.76456	down (both)
KLF2	-0.338695	4.71289	up (Toledo)
ANKRD65	-0.0438664	3.01952	up (Toledo)
TMEM88B	0	3.46622	up (Toledo)
SPOCK2	-0.111181	1.2527	up (Toledo)
MST1L	1.31666	0	up (OCI-LY19)
TMEM52	0	3.67459	up (Toledo)
FAAP20	0.368182	1.18263	up (Toledo)
KLF6	0.257001	1.57349	up (Toledo)
WRAP73	-0.178643	3.36631	up (Toledo)
YPEL5	-0.205712	3.78888	up (Toledo)
CHST2	-1.17634	4.64914	up (Toledo)
S100A4	-0.100782	4.16998	up (Toledo)
PHF13	0.133795	2.80726	up (Toledo)
EGR1	0.123082	2.63155	up (Toledo)
JUN	-0.0251321	5.36463	up (Toledo)
GSN	1.03343	0.174148	up (OCI-LY19)
NDRG1	1.45718	2.07372	up (both)
SLC2A5	1.73704	1.15614	up (both)
TMEM201	-0.0208154	2.05725	up (Toledo)
TLE3	-0.0520832	1.33173	up (Toledo)
PPP1R15A	-0.0557388	5.61437	up (Toledo)
MX1	-2.10301	3.3298	up (Toledo)
HRK	0.290108	1.32834	up (Toledo)
S100A6	0.0455959	5.57232	up (Toledo)
HSPA1A	3.04161	0	up (OCI-LY19)
AGTRAP	-0.340089	1.68469	up (Toledo)
PLOD1	0.364046	1.3952	up (Toledo)
RHOB	-0.805041	3.78446	up (Toledo)
DDIT4	0.0778266	4.73048	up (Toledo)
JUND	-0.147564	6.92855	up (Toledo)
AIF1	0.109403	3.93616	up (Toledo)
AGMAT	0.975417	1.70724	up (Toledo)
CIDEB	-0.413727	3.50752	up (Toledo)
FBXO42	0.00824088	1.24261	up (Toledo)
GRAP	-0.194427	1.51189	up (Toledo)
RPS27	0.35981	2.41023	up (Toledo)
HCST	-0.400094	1.80874	up (Toledo)
ATP13A2	0.334446	1.49245	up (Toledo)
CD69	-0.0956942	4.21815	up (Toledo)
IER3	1.93162	-3.35572	up (OCI-LY19)
FHL1	0.12767	1.40278	up (Toledo)
OSR2	1.20303	3.88429	up (both)
KLF9	-0.0537003	1.36099	up (Toledo)
ZNF629	0.0115938	1.57312	up (Toledo)
RAB3D	0.604007	1.83977	up (Toledo)
LYN	-0.541433	1.31579	up (Toledo)
BMF	-0.837596	1.17367	up (Toledo)
ZNF414	0.164505	1.72676	up (Toledo)
ZNF436	0.281806	1.80559	up (Toledo)
ZNF792	1.41538	1.17756	up (both)
PIK3IP1	0.103042	3.41627	up (Toledo)
GALE	-0.0235474	2.48791	up (Toledo)
RGS2	-0.363916	3.04358	up (Toledo)
TAGAP	-1.38696	2.58874	up (Toledo)
IFNLR1	-0.732271	3.09442	up (Toledo)
RCAN3	0.300281	1.01164	up (Toledo)
TP53INP1	-1.30294	1.11309	up (Toledo)
RUNX3	-0.0251253	1.2163	up (Toledo)
UBLCP1	-0.210101	1.78687	up (Toledo)
SCRN2	-0.435703	1.96176	up (Toledo)
GCHFR	0.643007	2.33208	up (Toledo)
PAFAH2	-0.299628	1.13493	up (Toledo)
ARL8A	0.137967	6.42277	up (Toledo)
ABHD4	0.286778	1.32361	up (Toledo)
FBXO32	0.351426	1.26863	up (Toledo)
GPN2	-0.196889	3.14528	up (Toledo)
MXD4	0.0577651	4.36047	up (Toledo)
TMEM222	0.14552	1.00113	up (Toledo)
SYTL1	2.5969	2.29815	up (both)
MAP3K6	0.367601	2.69305	up (Toledo)
PLIN2	0.748275	2.46565	up (Toledo)
PGPEP1	0.700407	1.94161	up (Toledo)
ERGIC3	1.15184	3.82841	up (both)
THEMIS2	-0.0487605	2.11538	up (Toledo)
XKR8	-0.260798	2.06788	up (Toledo)
CHMP2A	0.0515569	6.17084	up (Toledo)
CD37	1.08001	3.30605	up (both)
ANKRD37	1.23103	3.43208	up (both)
ZYX	1.56218	3.57096	up (both)
ZNF574	0.459782	1.60832	up (Toledo)
PTPRC	-1.14283	1.34179	up (Toledo)
SNRNP40	-0.0158692	1.21632	up (Toledo)
VAT1	1.50476	-1.51835	up (OCI-LY19)
BST2	0.0384003	5.54192	up (Toledo)
NEIL2	0.716883	1.08891	up (Toledo)
RPS29	-0.13973	1.70322	up (Toledo)
IQCC	-0.0462409	1.10284	up (Toledo)
TMEM234	1.09563	1.96628	up (both)
FAM229A	-1.77988	2.74114	up (Toledo)
MT1F	-0.188768	3.82506	up (Toledo)
PLEK	1.03753	1.57265	up (both)
TMEM54	0	1.66095	up (Toledo)
DHRS3	1.44469	0	up (OCI-LY19)
STAT5A	0.795807	1.42917	up (Toledo)
ABHD14B	0.258834	3.15495	up (Toledo)
GPC2	-0.0192916	1.44507	up (Toledo)
C1orf216	0.238029	2.62698	up (Toledo)
CCDC28A	0.280126	1.42106	up (Toledo)
NFIL3	1.16674	0.00834936	up (OCI-LY19)
CCNB1IP1	0.449769	2.6521	up (Toledo)
CD44	0.495229	1.10998	up (Toledo)
ZC3H12A	0.511241	3.3405	up (Toledo)
RPS21	0.385583	1.50235	up (Toledo)
C1orf109	-0.32328	1.74344	up (Toledo)
SLC25A44	0.0680497	1.70649	up (Toledo)
FHL3	1.24634	2.00515	up (both)
BTG1	-0.404358	1.74126	up (Toledo)
AP1B1	-0.24642	1.56312	up (Toledo)
PMAIP1	-0.217999	5.35419	up (Toledo)
BTG2	-0.306428	7.74715	up (Toledo)
RPS18	0.310298	3.41204	up (Toledo)
EFHD2	-0.35248	2.98354	up (Toledo)
BMP8B	-0.0767374	1.65136	up (Toledo)
MYCL	0.595495	1.79228	up (Toledo)
PTPN7	0.969047	1.24108	up (Toledo)
ETS2	-0.0307412	3.68225	up (Toledo)
CDK9	0.33937	4.21804	up (Toledo)
EXO5	0.221593	1.94575	up (Toledo)
RIMS3	-0.0117897	1.2873	up (Toledo)
GPKOW	0.255463	1.35067	up (Toledo)
KLHL24	0.0243491	2.95127	up (Toledo)
DFFA	0.614847	4.09499	up (Toledo)
C1orf50	0.724957	1.75055	up (Toledo)
ZNF691	0.517743	1.77881	up (Toledo)
ATG13	-0.243206	1.33476	up (Toledo)
RPL37	0.349806	1.36451	up (Toledo)
ELOVL1	0.244818	3.55797	up (Toledo)
MED8	0.0851135	4.25702	up (Toledo)
AP1S3	1.12707	0.916188	up (OCI-LY19)
TNFRSF14	0.609093	2.412	up (Toledo)
RGS1	1.55553	5.05385	up (both)
SLC6A9	-0.584136	2.0228	up (Toledo)
EXOSC4	0.288668	3.91546	up (Toledo)
BEST4	-0.0527241	1.42811	up (Toledo)
ALOX5AP	0.0607703	2.63993	up (Toledo)
RPL13	0.390353	1.43624	up (Toledo)
HPDL	-0.291775	2.26524	up (Toledo)
MT2A	-0.434787	1.20198	up (Toledo)
TXNIP	-0.282423	6.27578	up (Toledo)
APH1A	-0.173459	2.17972	up (Toledo)
RPL10A	0.266245	2.20844	up (Toledo)
CDC42EP3	0.916932	1.23383	up (Toledo)
RPL27	0.129287	1.15631	up (Toledo)
HSPA1B	2.22822	-4.3783	up (OCI-LY19)
RABAC1	0.121199	1.25285	up (Toledo)
ACTR8	-0.0803124	1.66893	up (Toledo)
ZNF740	-0.0310368	2.28261	up (Toledo)
ZBED3	-0.367383	2.84381	up (Toledo)
RHOG	0.30395	2.92865	up (Toledo)
COA7	-0.529155	2.37908	up (Toledo)
TMEM256	-0.0793614	2.98308	up (Toledo)
KIAA0930	0.0119473	1.22418	up (Toledo)
MRPL10	0.178833	3.88192	up (Toledo)
GABARAP	0.33989	1.04387	up (Toledo)
FTSJ1	0.626816	2.7497	up (Toledo)
FLOT2	-0.0331341	3.62878	up (Toledo)
OTUB1	-0.152839	2.64645	up (Toledo)
UBL5	-0.325384	1.37134	up (Toledo)
RPL10	0.192573	1.28823	up (Toledo)
C18orf32	-0.134429	3.46382	up (Toledo)
HHLA3	0.529881	2.25129	up (Toledo)
CTH	0.202197	1.27566	up (Toledo)
ACTG1	0.768961	1.76781	up (Toledo)
PNRC1	0.396918	5.82171	up (Toledo)
RPL29	0.406571	1.84433	up (Toledo)
PLP2	1.40452	0.722552	up (OCI-LY19)
KLF13	-0.998653	1.02988	up (Toledo)
RPL19	0.407651	1.64227	up (Toledo)
MBLAC2	0.167016	1.87232	up (Toledo)
RPL36	0.104727	2.00626	up (Toledo)
PRICKLE3	1.31156	3.34589	up (both)
HECA	0.257601	1.69596	up (Toledo)
IMPDH2	0.255822	2.10283	up (Toledo)
GOT1	-0.130073	3.13149	up (Toledo)
SMAD1	-0.714604	1.82854	up (Toledo)
LEPROT	0.467189	2.82473	up (Toledo)
ZSCAN2	-0.0204521	1.03326	up (Toledo)
ANKRD16	-0.157438	1.81618	up (Toledo)
HBEGF	1.11325	4.09069	up (both)
SEMA6A	1.08247	0	up (OCI-LY19)
MAP1LC3B	0.000449118	3.11151	up (Toledo)
FBXO41	-0.045892	2.24411	up (Toledo)
MAP3K1	-1.07773	1.73861	up (Toledo)
PRAF2	0.644179	3.17932	up (Toledo)
UBE2Z	-0.0679648	3.37372	up (Toledo)
VASP	0.766634	1.48167	up (Toledo)
RPS12	0.190758	1.17795	up (Toledo)
DHRS1	-0.0364007	3.49296	up (Toledo)
S1PR1	-0.173911	1.4624	up (Toledo)
RPL18A	-0.0853987	1.8545	up (Toledo)
CELSR2	-0.308676	2.02372	up (Toledo)
SORT1	0.307449	1.46881	up (Toledo)
ATXN7L2	-0.0252533	1.15452	up (Toledo)
SPINT2	0.148684	3.07773	up (Toledo)
CYBA	-0.362558	3.44912	up (Toledo)
PSMB10	-0.447526	1.91726	up (Toledo)
HOXC4	0.066507	2.05951	up (Toledo)
CHI3L2	-0.340674	1.12261	up (Toledo)
BNIP1	0.029519	2.16239	up (Toledo)
F8A1	-0.0843072	3.54008	up (Toledo)
DCLRE1B	-0.57698	1.0337	up (Toledo)
KAT5	-0.14948	4.76405	up (Toledo)
VANGL1	0.63574	1.00458	up (Toledo)
MT1X	-0.914115	6.89188	up (Toledo)
ZFAND2B	-0.392618	5.32873	up (Toledo)
RPL4	0.214763	1.92899	up (Toledo)
FAM43A	-0.223104	4.42009	up (Toledo)
HPS1	-0.0949708	3.02955	up (Toledo)
RPL22	0.281225	2.08793	up (Toledo)
ETHE1	0.190535	2.60512	up (Toledo)
ALKBH2	-0.0596081	6.6782	up (Toledo)
BCL2L1	-0.283509	1.14725	up (Toledo)
ZBTB9	0.667523	1.40404	up (Toledo)
PIAS3	-0.240887	2.12287	up (Toledo)
NUDT17	0.210033	4.25286	up (Toledo)
NHEJ1	1.08672	0.333274	up (OCI-LY19)
EXOSC6	-0.0423694	4.84318	up (Toledo)
ACOT2	-0.0549301	1.75069	up (Toledo)
BOLA1	1.15208	6.71164	up (both)
GPSM3	-0.181776	3.40969	up (Toledo)
PTRHD1	-0.355706	2.65703	up (Toledo)
SRRD	-0.236191	2.73335	up (Toledo)
ELL	0.110506	1.23467	up (Toledo)
ARNT	-0.0475237	1.42905	up (Toledo)
BNIPL	0.405347	1.1027	up (Toledo)
MAP2K3	-0.0272953	2.80959	up (Toledo)
CRTC3	0.677727	1.2496	up (Toledo)
GABPB2	-0.792527	1.35765	up (Toledo)
SEMA6C	-0.319408	1.75305	up (Toledo)
ZFP36L2	0.557257	1.94519	up (Toledo)
PCBP4	0.624743	4.00557	up (Toledo)
MSN	0.170356	2.2879	up (Toledo)
OAZ3	1.3392	0	up (OCI-LY19)
S100A10	-1.12987	1.73131	up (Toledo)
S100A11	-0.856356	1.40228	up (Toledo)
LCE3E	1.08104	0	up (OCI-LY19)
SPRR2A	-0.498105	4.31638	up (Toledo)
VPS26B	0.0810949	2.21244	up (Toledo)
DCXR	-0.10358	2.94145	up (Toledo)
SLC27A3	-0.454571	3.35411	up (Toledo)
CRTC2	0.956476	3.33215	up (Toledo)
ANTXR2	1.3846	0	up (OCI-LY19)
HBP1	0.332978	2.00137	up (Toledo)
MIEF1	0.128414	3.69662	up (Toledo)
CCDC115	0.113149	4.00037	up (Toledo)
IFT57	-0.383605	1.03364	up (Toledo)
TRIM46	0.236351	2.40936	up (Toledo)
CCNC	0.156563	1.0646	up (Toledo)
DESI1	0.61911	2.88987	up (Toledo)
SYT11	0.03886	1.32132	up (Toledo)
RPL21	0.116601	1.75748	up (Toledo)
RPS17	0.0982113	1.10989	up (Toledo)
PAQR6	0.052385	2.79278	up (Toledo)
RIPK2	1.17532	1.58695	up (both)
GLMP	0.0862115	4.34721	up (Toledo)
NCSTN	0.305444	3.69186	up (Toledo)
AAR2	-0.657474	2.68276	up (Toledo)
TRIB1	0.902146	3.87914	up (Toledo)
CRABP2	0.0243407	3.02387	up (Toledo)
GSTK1	-0.0682682	5.28248	up (Toledo)
DDX41	-0.0915041	5.65099	up (Toledo)
SMIM12	-0.258458	1.15009	up (Toledo)
TRIB3	0.409338	5.14739	up (Toledo)
ARPC4	-0.141025	1.10699	up (Toledo)
KCTD10	-0.587833	2.2815	up (Toledo)
GNG11	1.01869	0	up (OCI-LY19)
P2RX1	0.08039	1.5641	up (Toledo)
VANGL2	0.874332	1.11668	up (Toledo)
ARL16	0.796283	4.33645	up (Toledo)
EZR	-0.263241	1.77756	up (Toledo)
TUBB6	-0.427675	3.36585	up (Toledo)
TSR3	-0.154609	1.65876	up (Toledo)
TSTD1	1.60698	-0.0717846	up (OCI-LY19)
RAB4A	0.0893414	2.00232	up (Toledo)
NIT1	0.659942	2.49835	up (Toledo)
USP21	-0.00833257	3.87556	up (Toledo)
FCER1G	0.755603	1.51568	up (Toledo)
ISG20L2	-0.101861	4.11197	up (Toledo)
HSPA6	0.601759	1.40679	up (Toledo)
RPL34	0.191459	2.1976	up (Toledo)
FCRLB	0.357167	1.46875	up (Toledo)
ODC1	-0.355859	3.90654	up (Toledo)
R3HCC1L	0.108377	1.20497	up (Toledo)
BBS1	-0.0729239	1.57331	up (Toledo)
TADA1	-0.894814	1.16791	up (Toledo)
IFT52	0.0384916	1.69202	up (Toledo)
SIAH2	0.541514	2.55606	up (Toledo)
SFT2D2	0.885479	2.32216	up (Toledo)
BLZF1	-1.34122	1.13938	up (Toledo)
METTL18	-0.600472	1.66891	up (Toledo)
TMEM141	-0.67206	2.83381	up (Toledo)
TLCD1	-0.0502059	1.13994	up (Toledo)
VAMP4	-0.287535	1.7036	up (Toledo)
RPL23	0.0302413	1.78963	up (Toledo)
SLC2A3	2.42312	1.90771	up (both)
C8orf82	0.395241	2.10771	up (Toledo)
NFKBIL1	0.218853	2.59703	up (Toledo)
NCKAP1L	0.27575	1.00756	up (Toledo)
RCBTB2	1.957	0.217635	up (OCI-LY19)
ZDHHC4	-0.0183238	2.48639	up (Toledo)
MAPKAPK3	0.0796035	1.08473	up (Toledo)
RPS15A	0.179341	3.54506	up (Toledo)
MAN1A1	1.1046	0.999899	up (OCI-LY19)
LACTB	0.374431	1.95898	up (Toledo)
RPL31	0.209891	1.66588	up (Toledo)
MR1	-0.149383	1.6056	up (Toledo)
RPS6	0.102717	1.36111	up (Toledo)
DHX8	0.000243057	1.78704	up (Toledo)
NOP9	-0.395167	1.53024	up (Toledo)
GFI1	0.241815	2.78954	up (Toledo)
RSL24D1	0.223268	4.95767	up (Toledo)
MTHFR	0.243299	1.37914	up (Toledo)
HIPK3	-0.216577	1.29	up (Toledo)
PFDN5	-0.249815	1.09224	up (Toledo)
ZNF16	-0.240056	1.06689	up (Toledo)
OGFOD3	-0.166588	1.73936	up (Toledo)
COPE	0.0618911	4.3941	up (Toledo)
ZBTB41	-0.0747745	1.32576	up (Toledo)
C1orf53	0.704675	3.24931	up (Toledo)
GMIP	0.252305	1.10962	up (Toledo)
SHISA4	0	2.43821	up (Toledo)
RNF7	0.256083	3.75017	up (Toledo)
PIM2	0.0402187	1.64682	up (Toledo)
RABIF	0.00324597	3.59142	up (Toledo)
RNF181	-0.346574	1.87469	up (Toledo)
ADIPOR1	-0.135294	2.14037	up (Toledo)
ORAI3	-0.0305519	2.0064	up (Toledo)
GPR108	0.114458	2.87202	up (Toledo)
RNF166	-0.28191	2.13814	up (Toledo)
ZNF251	0.63185	1.23141	up (Toledo)
PIK3C2B	-0.0199964	1.16697	up (Toledo)
TMEM81	0.151098	4.26061	up (Toledo)
NUAK2	0.0136392	1.84424	up (Toledo)
PON2	-0.0676557	1.71265	up (Toledo)
EMG1	-0.165301	3.16237	up (Toledo)
RALGDS	0.473496	1.36616	up (Toledo)
DYRK3	1.33427	0	up (OCI-LY19)
RTN4	0.167526	2.08536	up (Toledo)
SPCS3	0.15071	1.47463	up (Toledo)
APOL6	0.39649	3.32482	up (Toledo)
GMFG	-0.0988959	4.83653	up (Toledo)
NSL1	0.484613	2.17515	up (Toledo)
PROX1	0.0332622	1.6802	up (Toledo)
PICALM	-0.608468	1.63296	up (Toledo)
SENP2	-0.127099	1.45282	up (Toledo)
TLR2	2.35814	0	up (OCI-LY19)
PALLD	1.07042	0	up (OCI-LY19)
SMIM19	0.335754	2.4787	up (Toledo)
ZNF689	0.1844	1.07331	up (Toledo)
TAF1A	-0.778129	1.10151	up (Toledo)
IFNGR2	-0.0444889	3.79193	up (Toledo)
RPS7	0.131102	3.24254	up (Toledo)
SLC39A4	0.281434	4.56229	up (Toledo)
TMEM167B	-0.290986	3.34674	up (Toledo)
RAP2A	-0.0376896	1.92409	up (Toledo)
MRFAP1L1	-0.0377653	6.33851	up (Toledo)
SURF2	0.0280935	1.99341	up (Toledo)
CNBP	-0.112492	3.93093	up (Toledo)
SNAP47	-0.853987	1.78721	up (Toledo)
PLEKHA3	0.38917	1.26553	up (Toledo)
SVBP	0.0177331	2.41789	up (Toledo)
RPL7A	0.12371	1.23776	up (Toledo)
IBA57	-0.0561558	2.38636	up (Toledo)
RPIA	-0.0601598	1.19584	up (Toledo)
MTMR1	-0.414196	1.04808	up (Toledo)
ACTA1	-0.0223848	1.95639	up (Toledo)
ABCB10	-0.0788903	1.16383	up (Toledo)
PPM1F	0.300402	2.19982	up (Toledo)
ZSCAN16	0.33084	1.32188	up (Toledo)
EXOC8	0.193732	3.92932	up (Toledo)
RNASEK	-0.0740771	2.87544	up (Toledo)
ARL8B	0.268486	1.83691	up (Toledo)
RPS20	0.426998	1.02589	up (Toledo)
NAA30	0.02511	1.24202	up (Toledo)
GGPS1	-0.341657	2.59568	up (Toledo)
NDUFB7	-0.597781	5.20144	up (Toledo)
KCTD20	0.0655546	2.16115	up (Toledo)
TFIP11	-0.00139486	1.37388	up (Toledo)
CRTAP	-0.048687	3.58038	up (Toledo)
PARL	-0.0422441	1.61228	up (Toledo)
NRBP1	0.352523	3.06118	up (Toledo)
NDUFB11	-0.0588156	1.08116	up (Toledo)
BLOC1S1	-0.369876	5.61708	up (Toledo)
CAPN1	0.157079	2.37177	up (Toledo)
NXPE3	-0.106958	1.35631	up (Toledo)
ZNF496	0.223482	1.01528	up (Toledo)
RPL41	-0.0464579	3.32358	up (Toledo)
RPL22L1	0.434104	5.88825	up (Toledo)
CMC1	0.0325508	1.31016	up (Toledo)
MARCKSL1	0.326235	5.80847	up (Toledo)
C9orf78	0.127859	4.90189	up (Toledo)
C18orf21	0.428964	2.92846	up (Toledo)
TSR2	-0.135351	4.48753	up (Toledo)
ASB13	0.273716	2.43986	up (Toledo)
FMNL1	-0.0790962	2.70253	up (Toledo)
DLD	0.0698174	2.52966	up (Toledo)
IL15RA	1.07171	0	up (OCI-LY19)
IL2RA	1.65759	-0.0135871	up (OCI-LY19)
RPS23	0.0849695	1.93579	up (Toledo)
TPT1	0.23515	1.30184	up (Toledo)
HSPA8	0.140969	1.40558	up (Toledo)
C17orf80	0.171828	1.64058	up (Toledo)
UBE2D2	-0.0356252	1.94748	up (Toledo)
EIF3H	0.704469	1.47021	up (Toledo)
ZNF316	0.231726	3.55595	up (Toledo)
HADHA	0.0436425	1.91605	up (Toledo)
RAB1B	-0.116755	3.47741	up (Toledo)
CDNF	1.44133	0	up (OCI-LY19)
SUV39H2	-0.682321	1.22737	up (Toledo)
RPL23A	0.512292	1.67877	up (Toledo)
ACBD7	-0.39773	2.14113	up (Toledo)
GMFB	0.1101	2.0252	up (Toledo)
NPC2	0.406003	1.67627	up (Toledo)
SNX3	-0.250499	2.09571	up (Toledo)
ADPRM	-0.230578	1.27705	up (Toledo)
PTP4A2	0.032888	3.31837	up (Toledo)
SAMM50	-0.192544	2.2886	up (Toledo)
PNPO	0.0916703	2.56424	up (Toledo)
FZD8	0	1.31834	up (Toledo)
TSNAX	0.0456902	1.7399	up (Toledo)
COX15	-0.20169	2.35059	up (Toledo)
NR3C1	-0.240228	1.37858	up (Toledo)
DSTYK	0.481387	1.61097	up (Toledo)
ZNHIT6	0.501036	1.35593	up (Toledo)
MED24	-0.0226875	1.74946	up (Toledo)
ADO	-0.00127772	4.70346	up (Toledo)
CHMP7	0.540424	2.55945	up (Toledo)
OR13A1	0	1.11678	up (Toledo)
ALOX5	0	1.33029	up (Toledo)
NUP93	-0.136866	1.49189	up (Toledo)
POLDIP2	-0.00452917	1.36456	up (Toledo)
SLC25A5	-0.0212755	2.147	up (Toledo)
RPL6	0.0980544	1.89112	up (Toledo)
CLPX	0.0956594	1.74305	up (Toledo)
GPR65	-0.115133	1.91405	up (Toledo)
BLCAP	-0.224528	3.8335	up (Toledo)
MAP1S	0.747446	1.9105	up (Toledo)
EID1	0.0269927	2.51751	up (Toledo)
OSGIN2	0.930651	1.77524	up (Toledo)
EMC3	-0.241386	1.91633	up (Toledo)
SH3BP1	0.0432981	1.8056	up (Toledo)
CDV3	0.27934	3.73492	up (Toledo)
FEM1B	-0.0929605	3.29294	up (Toledo)
TCEAL8	-0.0382957	4.86768	up (Toledo)
CTRL	-0.00966821	4.8644	up (Toledo)
FAM149B1	1.01583	0.346585	up (OCI-LY19)
ZNF428	-0.0392694	1.90848	up (Toledo)
MSS51	0.0811417	1.08778	up (Toledo)
ALDH9A1	0.03252	3.48094	up (Toledo)
GNB2	-0.0137787	6.24611	up (Toledo)
SP2	-0.444783	2.4542	up (Toledo)
DUSP16	0.306548	1.02654	up (Toledo)
ILVBL	-0.221572	1.73149	up (Toledo)
ZFAND1	1.2017	-3.4256	up (OCI-LY19)
RDH14	0.166933	2.53823	up (Toledo)
NKIRAS2	-0.0101274	5.29274	up (Toledo)
IFIT5	-0.522516	2.66971	up (Toledo)
PANK1	-0.381783	1.08225	up (Toledo)
TRIM44	-0.086878	2.28252	up (Toledo)
EEF2K	0.583528	1.02418	up (Toledo)
VTI1B	0.567	1.33563	up (Toledo)
PPP5C	0.517537	1.07028	up (Toledo)
SMDT1	-0.013845	5.48647	up (Toledo)
DOK3	0.248693	3.94959	up (Toledo)
ARL2BP	0.352699	3.80731	up (Toledo)
CPT1A	-0.0383456	2.22574	up (Toledo)
RAB40C	0.514176	1.24137	up (Toledo)
MRPL54	-0.821081	4.32359	up (Toledo)
PPP2R5A	0.157389	1.04668	up (Toledo)
SCAND1	-0.0074368	4.15085	up (Toledo)
NDUFS5	-0.323265	2.61698	up (Toledo)
HLA-DMA	0.314482	1.47468	up (Toledo)
CMAS	-0.206094	2.38436	up (Toledo)
ZDHHC16	0.470456	2.22241	up (Toledo)
CYB5R1	0.517832	4.70695	up (Toledo)
MORN4	0	1.05674	up (Toledo)
PAG1	1.07812	1.63217	up (both)
PYROXD2	0.135535	1.15716	up (Toledo)
UQCRB	0.621476	1.3795	up (Toledo)
CAP1	-0.0157139	1.1125	up (Toledo)
KRT10	-0.271793	6.30243	up (Toledo)
NELFE	0.0501129	5.14547	up (Toledo)
AKNA	0.0446962	1.65195	up (Toledo)
RNASEH2C	-0.325607	2.80694	up (Toledo)
LZTS2	1.33638	3.35904	up (both)
PSMB8	-0.0752143	2.078	up (Toledo)
POLL	-0.232208	1.4096	up (Toledo)
PPP1R14B	-0.484352	1.6001	up (Toledo)
YWHAG	0.122835	3.39484	up (Toledo)
MAGED1	-0.438876	1.31418	up (Toledo)
JUNB	-0.638444	1.58231	up (Toledo)
NFKB2	0.260108	1.99157	up (Toledo)
GAS7	0.218478	1.60127	up (Toledo)
LANCL1	-0.0349465	1.05788	up (Toledo)
CALR	0.268562	3.14303	up (Toledo)
ZNF696	0.653337	3.16972	up (Toledo)
PCGF6	0.30363	1.10039	up (Toledo)
TMEM230	0.133578	1.53285	up (Toledo)
CALHM2	0.110886	1.43415	up (Toledo)
CNPPD1	0.128362	4.73766	up (Toledo)
MRPL33	0.325243	4.74854	up (Toledo)
COX5A	-0.00520781	4.49308	up (Toledo)
CORO1A	-0.589447	1.76144	up (Toledo)
RBFA	-0.15098	4.51239	up (Toledo)
DUSP5	0	1.75633	up (Toledo)
AMPD2	0.213192	2.16443	up (Toledo)
MRPL45	0.392013	2.10705	up (Toledo)
DNLZ	-0.629612	2.30868	up (Toledo)
SLC38A2	0.173505	1.59627	up (Toledo)
PBXIP1	0.022121	1.3881	up (Toledo)
TIMM22	-0.0284177	2.02309	up (Toledo)
NHLRC2	-0.0353646	1.16599	up (Toledo)
ADRB1	0	2.94171	up (Toledo)
GYPC	0.509103	2.7975	up (Toledo)
ACVR1B	-0.219634	1.74671	up (Toledo)
BZW1	-0.444078	2.70373	up (Toledo)
MRPL30	-0.100209	1.34191	up (Toledo)
ABHD15	-0.298663	2.18166	up (Toledo)
MCL1	-0.141646	1.89633	up (Toledo)
RHBDF2	0.160852	1.08573	up (Toledo)
MAFF	0.142343	1.1116	up (Toledo)
BAK1	-0.382312	3.41651	up (Toledo)
PSTK	0.00699619	1.47172	up (Toledo)
PRKCSH	0.276279	2.7891	up (Toledo)
ATXN7L3B	0.0824027	4.57366	up (Toledo)
BRF2	0.730814	1.55792	up (Toledo)
UQCRC2	0.0940566	2.90064	up (Toledo)
YPEL3	-0.152841	5.37692	up (Toledo)
RIOK2	0.385602	1.83102	up (Toledo)
FUOM	-0.21316	3.34224	up (Toledo)
ASAH1	0.0486973	1.04887	up (Toledo)
PAOX	-0.740469	1.82263	up (Toledo)
NUDT22	-0.197855	3.68349	up (Toledo)
IFITM3	-1.84424	2.61563	up (Toledo)
PNKD	-0.814729	1.15242	up (Toledo)
LMNTD2	-0.642234	1.25955	up (Toledo)
RASSF7	0.151843	5.74803	up (Toledo)
TMEM80	0.313533	3.80031	up (Toledo)
EPS8L2	1.54505	0.662624	up (OCI-LY19)
CEND1	0	3.76902	up (Toledo)
BECN1	-0.286911	3.79564	up (Toledo)
ALDOC	2.25648	2.53769	up (both)
VEGFB	0.116277	4.15663	up (Toledo)
TRAPPC6A	-0.235811	2.57073	up (Toledo)
DUSP8	0.44484	1.93642	up (Toledo)
IFITM10	-0.147437	1.54809	up (Toledo)
SNRPD2	-0.211794	2.30599	up (Toledo)
CDKN1C	0	4.78889	up (Toledo)
PHLDA2	2.49644	3.48071	up (both)
CHRNA10	-0.299246	2.01998	up (Toledo)
ORMDL3	0.485811	2.88304	up (Toledo)
PGAP2	-0.227506	1.59629	up (Toledo)
EMC10	-0.537046	2.20858	up (Toledo)
TRIM21	0.379366	2.14896	up (Toledo)
WIPF1	-0.0171608	1.20366	up (Toledo)
APBB1	0.726663	1.72638	up (Toledo)
UBE2L6	0.111337	2.04412	up (Toledo)
IL2RG	0.351296	3.43767	up (Toledo)
C16orf74	-0.257929	1.26653	up (Toledo)
CHMP3	0.0372113	1.06659	up (Toledo)
FBXL12	-0.0690427	1.06892	up (Toledo)
TMEM41B	0.0902392	1.45645	up (Toledo)
PPCS	-0.0302472	1.11397	up (Toledo)
SAYSD1	0.651117	1.68449	up (Toledo)
ADM	3.14554	-1.89177	up (OCI-LY19)
NSUN4	0.491156	1.48499	up (Toledo)
AGBL5	0.137172	1.6379	up (Toledo)
MAX	-0.108269	1.08557	up (Toledo)
PPIB	0.276987	4.29517	up (Toledo)
CALCB	1.22169	2.44734	up (both)
ZBTB4	0.290697	1.5672	up (Toledo)
NCR3LG1	-0.217884	1.70376	up (Toledo)
ARHGAP1	0.0952632	1.38876	up (Toledo)
CDC42	-0.175856	1.37764	up (Toledo)
RPL30	0.563926	1.83606	up (Toledo)
HTATIP2	-0.561126	1.64695	up (Toledo)
SVIP	-2.69359	-1.3327	down (both)
MAGEF1	0.368013	5.21236	up (Toledo)
ZFAND2A	0.36427	3.22934	up (Toledo)
PATL1	0.481879	3.25851	up (Toledo)
TRAM2	1.02157	-2.62216	up (OCI-LY19)
TWF2	0.054783	1.33319	up (Toledo)
CEP68	0.506	2.30253	up (Toledo)
COMMD7	-0.137542	2.33903	up (Toledo)
GMPPB	0.172611	3.56243	up (Toledo)
FBXO3	-1.2546	1.6726	up (Toledo)
CSNK2A2	-0.18983	1.62211	up (Toledo)
UBE2D3	0.128788	2.68951	up (Toledo)
NFRKB	0.226635	1.29132	up (Toledo)
APIP	0.827967	1.08974	up (Toledo)
CD2BP2	-0.289252	2.01607	up (Toledo)
FEM1A	0.0586044	2.68608	up (Toledo)
CEBPD	0.29148	4.73017	up (Toledo)
C11orf96	-0.127	3.42521	up (Toledo)
TP53I11	0.120822	1.85647	up (Toledo)
SLC35C1	0.275697	1.34819	up (Toledo)
CRY2	0.134596	1.50565	up (Toledo)
NCOA4	-0.218821	3.77263	up (Toledo)
HARBI1	-0.801581	1.28915	up (Toledo)
PFDN1	-0.263044	2.43447	up (Toledo)
TINF2	-0.0117866	5.23783	up (Toledo)
ZNF408	-0.242029	3.84457	up (Toledo)
WTAP	-0.141807	1.70523	up (Toledo)
ACP2	-0.059675	3.08665	up (Toledo)
PDCD4	-0.205224	3.67462	up (Toledo)
SPI1	0.537801	2.01669	up (Toledo)
MYD88	-0.0880673	1.20957	up (Toledo)
KBTBD4	-0.0559752	1.70085	up (Toledo)
SLC25A38	0.358419	2.83802	up (Toledo)
COX7A2L	0.238632	2.81882	up (Toledo)
FYTTD1	0.29642	2.32195	up (Toledo)
CLP1	0.395719	3.40353	up (Toledo)
CDK2AP1	-0.338492	4.40448	up (Toledo)
WT1	1.50435	0	up (OCI-LY19)
NBR1	0.0694974	2.5758	up (Toledo)
DTX4	-0.248292	1.59066	up (Toledo)
UFSP2	0.477002	1.04463	up (Toledo)
STK24	-0.0120614	2.472	up (Toledo)
LAPTM5	-0.495973	1.12318	up (Toledo)
MYC	0.273316	3.47555	up (Toledo)
RAB13	1.13232	0.562691	up (OCI-LY19)
TKFC	-0.00444583	2.8813	up (Toledo)
TMEM216	0.112839	2.42102	up (Toledo)
RNF187	-0.00437584	2.95292	up (Toledo)
BCL2L11	0.140714	2.49775	up (Toledo)
TMEM129	-0.249707	2.20786	up (Toledo)
PGLS	-0.46682	1.82991	up (Toledo)
ILK	-0.205905	3.77568	up (Toledo)
DDT	-0.296482	2.34576	up (Toledo)
BBIP1	-0.119691	1.83818	up (Toledo)
EEF1A1	0.014143	6.22149	up (Toledo)
INTS5	0.0200546	4.27889	up (Toledo)
TPD52L2	-0.299684	1.78016	up (Toledo)
ZBTB3	-0.212968	2.41252	up (Toledo)
HPCAL1	1.29366	0.702418	up (OCI-LY19)
STX5	-0.612916	3.10418	up (Toledo)
TPM3	-0.363346	2.24314	up (Toledo)
NOA1	0.299133	2.90325	up (Toledo)
RAB5A	-0.13466	1.45165	up (Toledo)
STAT6	0.00767277	1.03841	up (Toledo)
CSNK1D	-0.384761	2.50733	up (Toledo)
NAA40	-0.256132	1.27229	up (Toledo)
ZNF768	0.269168	2.62071	up (Toledo)
CHMP4B	-0.243714	1.75519	up (Toledo)
SPRYD7	-0.251481	1.63332	up (Toledo)
NUDT3	0.0427104	1.63031	up (Toledo)
TERF2IP	-0.0428209	5.14716	up (Toledo)
CLPP	-0.0388488	5.35857	up (Toledo)
NACA	0.334804	1.86805	up (Toledo)
ZNF419	-0.328049	3.31531	up (Toledo)
PPP2R5B	0.373909	1.25129	up (Toledo)
IMP4	0.0497638	1.83933	up (Toledo)
NCOA5	-0.442379	3.80031	up (Toledo)
ZNHIT2	0.0392744	4.64108	up (Toledo)
FAM8A1	0.746781	3.43372	up (Toledo)
E2F6	-0.285777	2.12169	up (Toledo)
PBX2	0.155821	4.25483	up (Toledo)
CDC42EP2	-0.914675	1.47189	up (Toledo)
IER2	0.116023	5.50931	up (Toledo)
TIGD3	0.368935	2.71911	up (Toledo)
ANGEL2	0.134153	1.44093	up (Toledo)
VPS39	0.544047	1.66412	up (Toledo)
UGCG	0.239252	1.2251	up (Toledo)
MAP3K11	0.0232719	2.64246	up (Toledo)
SIPA1	0.526832	3.04469	up (Toledo)
SNX32	0	1.09653	up (Toledo)
TRIM27	-0.0252601	2.87706	up (Toledo)
TRAPPC1	-0.355501	5.80304	up (Toledo)
NIP7	0.146644	4.56533	up (Toledo)
TMSB4X	0.180966	6.25938	up (Toledo)
HVCN1	-0.353972	1.26169	up (Toledo)
SLC29A2	0.645674	1.12132	up (Toledo)
UROD	-0.40024	5.1165	up (Toledo)
PELI3	0.270856	1.95044	up (Toledo)
SMIM15	-0.257767	4.80866	up (Toledo)
SSBP4	-0.410676	3.48805	up (Toledo)
N4BP1	0.122518	1.19418	up (Toledo)
CTSF	0.41458	2.85155	up (Toledo)
TMEM218	0.00389402	2.36074	up (Toledo)
RCE1	-0.135732	3.3844	up (Toledo)
CLCF1	-0.961702	1.77295	up (Toledo)
CARNS1	0.618656	3.10004	up (Toledo)
SSR2	0.00802379	2.3916	up (Toledo)
EIF1B	-0.110232	2.57434	up (Toledo)
ALDH3B1	1.16804	0	up (OCI-LY19)
IGHMBP2	-0.018297	1.42374	up (Toledo)
FOXK1	0.179298	1.61816	up (Toledo)
CCNDBP1	0.381476	1.37001	up (Toledo)
PIM3	0.300436	2.929	up (Toledo)
CTTN	0.0929119	1.10242	up (Toledo)
KRTAP5-9	1.13652	0	up (OCI-LY19)
IL18BP	1.16981	0	up (OCI-LY19)
PES1	-0.16792	1.42546	up (Toledo)
PMF1	-0.243294	2.47387	up (Toledo)
RELT	-0.335046	2.3507	up (Toledo)
PAAF1	0.537851	1.64508	up (Toledo)
TYW3	0.0461563	1.41257	up (Toledo)
YIPF2	0.0297469	2.36619	up (Toledo)
NEU3	-0.029763	2.20305	up (Toledo)
YIPF3	0.120564	4.91535	up (Toledo)
SERPINH1	0	3.28397	up (Toledo)
PGD	-0.318424	3.3595	up (Toledo)
GNAI3	-0.153285	1.86686	up (Toledo)
LRRC32	1.23844	0	up (OCI-LY19)
ARF1	0.0567675	1.10736	up (Toledo)
AAMDC	-0.669106	1.10814	up (Toledo)
POLR1D	0.0847225	2.87419	up (Toledo)
KCTD21	0.377831	1.30284	up (Toledo)
KDM3A	0.317913	1.29822	up (Toledo)
DDIAS	-0.540204	1.08109	up (Toledo)
BRK1	-0.0270607	1.89483	up (Toledo)
HNRNPL	-0.283976	3.91041	up (Toledo)
NFE2L3	1.06132	1.78611	up (both)
CYTH2	0.0817121	4.26744	up (Toledo)
CBLL1	0.595725	2.61235	up (Toledo)
DEXI	-0.352914	4.16186	up (Toledo)
EIF4B	0.0690391	1.19886	up (Toledo)
VPS11	-0.321571	2.44816	up (Toledo)
BIRC3	-0.277499	3.23739	up (Toledo)
SDHC	0.114748	3.55518	up (Toledo)
RAB24	0.195087	3.56008	up (Toledo)
C11orf65	1.12528	0	up (OCI-LY19)
SLC35B1	0.138196	3.40529	up (Toledo)
POLR1E	0.152929	2.65703	up (Toledo)
TUBA1A	-0.437956	1.09974	up (Toledo)
IRS2	-0.0910541	3.49865	up (Toledo)
PIH1D2	1.03776	0	up (OCI-LY19)
FAM89B	-0.429878	5.14865	up (Toledo)
PTS	0.387758	2.78171	up (Toledo)
BCKDHA	-0.544086	2.78343	up (Toledo)
C11orf71	0.32936	1.22292	up (Toledo)
ZNF789	0.974202	1.58343	up (Toledo)
IRF4	-0.444007	1.56544	up (Toledo)
NAA50	-0.226785	2.28046	up (Toledo)
ANAPC13	-0.0609701	3.21474	up (Toledo)
TBC1D13	-0.0750656	1.20482	up (Toledo)
SLC33A1	0.22005	1.32974	up (Toledo)
TPRG1L	0.0237736	4.23519	up (Toledo)
CTNNBIP1	0.104099	1.56837	up (Toledo)
TMEM69	0.767491	2.62775	up (Toledo)
C2CD2L	-0.255602	2.17004	up (Toledo)
ST13	0.378263	1.41432	up (Toledo)
NLRX1	0.0102946	1.28263	up (Toledo)
FNTA	0.711755	3.27767	up (Toledo)
SCPEP1	-0.563993	1.98461	up (Toledo)
ROBO3	0	1.05495	up (Toledo)
ING3	-0.235169	1.82526	up (Toledo)
PSMG4	-0.00778497	2.01438	up (Toledo)
ZNF579	-0.00955867	2.85931	up (Toledo)
MYL12B	0.531924	3.71957	up (Toledo)
TMEM106B	-0.161242	1.63935	up (Toledo)
DCPS	-1.03625	1.45764	up (Toledo)
RNMT	0.369081	2.58925	up (Toledo)
SET	-0.215879	1.11321	up (Toledo)
ST14	-0.567417	1.17432	up (Toledo)
SNX19	0.114188	1.466	up (Toledo)
B3GALT6	-0.349046	6.37165	up (Toledo)
MFNG	0.0646548	1.37456	up (Toledo)
UBAC2	-0.212749	1.28186	up (Toledo)
DCP1B	-0.47921	1.61777	up (Toledo)
SPCS1	-0.375994	4.46504	up (Toledo)
THAP7	-0.274902	4.17441	up (Toledo)
TULP3	-0.0182187	1.59913	up (Toledo)
STK16	-0.342824	3.85091	up (Toledo)
ARPC1A	0.50986	1.68049	up (Toledo)
RPL11	0.506043	1.04221	up (Toledo)
ENSA	-0.165663	1.97304	up (Toledo)
CD27	1.91597	0	up (OCI-LY19)
UTP15	0.102059	1.16952	up (Toledo)
SLC2A1	0.237266	1.56547	up (Toledo)
SOD2	0.00944574	1.67692	up (Toledo)
LPAR5	-0.575424	1.2859	up (Toledo)
PIANP	-1.22876	2.0537	up (Toledo)
PTMS	-1.21193	-1.76137	down (both)
PSMD9	-0.367904	1.09584	up (Toledo)
SPSB2	-0.646993	2.95405	up (Toledo)
LRRC23	0.130491	2.88452	up (Toledo)
ATN1	0.822289	1.99116	up (Toledo)
ATP6V1A	0.0834108	1.15876	up (Toledo)
C1S	0.692463	1.44236	up (Toledo)
DDAH2	0.276903	4.18243	up (Toledo)
NECAP1	-0.340434	2.1302	up (Toledo)
PET100	-0.395849	4.67742	up (Toledo)
RNF26	0.469325	3.1818	up (Toledo)
RILPL2	0.353628	1.528	up (Toledo)
UFC1	-0.101316	3.5397	up (Toledo)
CAT	0.081501	2.51827	up (Toledo)
TAS2R13	0.168968	1.36954	up (Toledo)
TAS2R20	-0.286816	4.16679	up (Toledo)
TAS2R30	-0.693615	3.64697	up (Toledo)
ZBTB14	-0.331275	1.35628	up (Toledo)
HIF1A	0.251019	1.77957	up (Toledo)
CREBL2	0.21627	1.95188	up (Toledo)
KANSL2	0.369391	2.78559	up (Toledo)
SND1	0.177991	1.12116	up (Toledo)
DUSP14	-0.0229855	2.28244	up (Toledo)
MRPS18B	0.127175	4.33983	up (Toledo)
JKAMP	0.535015	2.28311	up (Toledo)
ABRACL	0.0926048	1.42795	up (Toledo)
KIAA1143	-0.0604989	3.44633	up (Toledo)
TMEM186	0.32543	3.69434	up (Toledo)
MRPS24	-0.379891	1.535	up (Toledo)
GOLGA7	0.421178	2.25661	up (Toledo)
STAT3	0.559098	1.36848	up (Toledo)
TMED10	-0.0693667	1.94897	up (Toledo)
MED21	-0.391667	3.24606	up (Toledo)
CMPK1	-0.0376758	1.715	up (Toledo)
RAB35	0.00381815	2.93177	up (Toledo)
RPL36AL	-0.303855	1.12128	up (Toledo)
ACAA1	0.255309	2.85525	up (Toledo)
EIF4H	0.000915279	2.50327	up (Toledo)
CPSF4	-0.368382	3.6898	up (Toledo)
ALG10	0.359454	1.06614	up (Toledo)
TSPYL4	-0.389216	3.55081	up (Toledo)
RCL1	-0.389259	1.52171	up (Toledo)
NDUFB1	-0.269695	1.77447	up (Toledo)
NXT2	0.354336	2.12422	up (Toledo)
VDR	-2.85221	1.03532	up (Toledo)
VDAC2	0.447261	2.83876	up (Toledo)
ZNF641	0.860149	2.37907	up (Toledo)
JUP	0.229644	2.47243	up (Toledo)
MRPS30	-0.140962	3.83031	up (Toledo)
DDN	0.209	2.99127	up (Toledo)
ARIH1	-0.215071	1.20784	up (Toledo)
RHEBL1	0.161422	3.37426	up (Toledo)
CAPN3	1.11436	0.354089	up (OCI-LY19)
PRPF40B	0.105754	1.41363	up (Toledo)
BCDIN3D	0.503616	1.95426	up (Toledo)
TMEM14C	0.328832	4.22061	up (Toledo)
CNOT11	-0.308593	3.07679	up (Toledo)
PPT1	0.000777844	1.26747	up (Toledo)
TRUB2	0.220681	1.71128	up (Toledo)
EIF3E	0.813722	3.31232	up (Toledo)
SFT2D3	-0.0125226	1.99976	up (Toledo)
PDGFA	3.17547	0	up (OCI-LY19)
CDKN2D	-0.260667	1.35237	up (Toledo)
BIN2	1.40469	0.162018	up (OCI-LY19)
MRPL43	-0.125961	2.43647	up (Toledo)
NR4A1	0.714868	1.41224	up (Toledo)
RNF114	0.0660054	4.13047	up (Toledo)
CSAD	0.378684	1.44082	up (Toledo)
EAPP	-0.377012	2.25772	up (Toledo)
MED10	0.0293746	1.13756	up (Toledo)
MFSD1	0.238618	1.14956	up (Toledo)
POLR2K	0.223588	6.32258	up (Toledo)
C19orf53	0.0615087	6.00784	up (Toledo)
ZNF639	0.134654	2.92647	up (Toledo)
SMUG1	-0.289118	2.45861	up (Toledo)
PHYH	-0.828615	1.2379	up (Toledo)
ITGA5	1.3118	0	up (OCI-LY19)
TESPA1	0.287999	1.27394	up (Toledo)
ZW10	0.16539	1.50875	up (Toledo)
ISY1	-0.00935576	1.68733	up (Toledo)
PFN1	-0.132804	2.56014	up (Toledo)
MRPS35	0.247088	2.96043	up (Toledo)
SUOX	0.20901	1.39164	up (Toledo)
IKZF4	-0.31957	1.40518	up (Toledo)
PCGF5	-0.122238	1.12244	up (Toledo)
YTHDF1	-0.32155	4.48421	up (Toledo)
COQ10A	0.0666463	5.1671	up (Toledo)
PSMD8	-0.515718	2.79958	up (Toledo)
IL23A	-0.0225199	4.25638	up (Toledo)
CREG1	0.446772	1.70399	up (Toledo)
SARM1	0.642763	2.36558	up (Toledo)
STK17B	0.946651	1.33399	up (Toledo)
PRIM1	-0.369111	1.4262	up (Toledo)
MRPS33	0.53889	3.51956	up (Toledo)
NXPH4	0	3.02072	up (Toledo)
AGA	0.0951261	2.73734	up (Toledo)
NDUFA4L2	0.0407186	1.77969	up (Toledo)
INHBE	0.214585	5.12318	up (Toledo)
GLI1	0.20771	2.32635	up (Toledo)
NFYA	0.398913	1.96269	up (Toledo)
PIP4K2C	0.338767	2.4931	up (Toledo)
DTX3	-1.10261	5.34567	up (Toledo)
AGAP2	0.251891	1.9417	up (Toledo)
CYP27B1	1.01518	2.27053	up (both)
ALKBH6	-0.246088	2.02559	up (Toledo)
AVIL	0.662258	1.84405	up (Toledo)
TIGD1	0.381577	2.45075	up (Toledo)
OCIAD2	0.216507	1.12534	up (Toledo)
XPOT	-0.199444	3.49392	up (Toledo)
ACP6	1.17803	-3.19012	up (OCI-LY19)
TIFA	-0.462038	3.92826	up (Toledo)
ACTR1B	0.186558	4.34281	up (Toledo)
PPP1R35	-0.269418	8.16672	up (Toledo)
SMG5	0.102024	2.90462	up (Toledo)
MRPS34	-0.617564	2.18665	up (Toledo)
ATF3	0.750575	1.17907	up (Toledo)
CRCP	-0.106894	2.74272	up (Toledo)
MAP4K1	-0.163677	2.36013	up (Toledo)
BBS10	0.436891	2.94242	up (Toledo)
HEBP1	-0.0268472	1.05102	up (Toledo)
MYDGF	0.228073	1.30038	up (Toledo)
NUDT4	-0.0288388	1.77251	up (Toledo)
ZFAND5	-0.238748	2.49463	up (Toledo)
C1orf43	0.172653	4.35769	up (Toledo)
ARPC3	-0.244191	2.69287	up (Toledo)
ATP6V0B	-0.305477	1.35653	up (Toledo)
HINT1	-0.0469463	1.42759	up (Toledo)
USP44	0	1.47718	up (Toledo)
ATP6V0D1	-0.255218	1.09141	up (Toledo)
DGKD	-0.136251	2.08186	up (Toledo)
MFSD5	-0.64508	4.12298	up (Toledo)
VIM	0.088196	3.66787	up (Toledo)
MAP7D1	-0.0314129	3.19105	up (Toledo)
ANKRD13A	0.176527	1.83489	up (Toledo)
UBIAD1	0.0855161	1.78971	up (Toledo)
SEC61G	0.339756	2.69324	up (Toledo)
C12orf75	-0.0438409	1.5543	up (Toledo)
PITHD1	-0.505006	3.9146	up (Toledo)
POLR3B	-1.07675	-1.40472	down (both)
COA5	-0.248415	1.66034	up (Toledo)
NAGPA	-0.245735	1.94551	up (Toledo)
FICD	0.814722	2.59092	up (Toledo)
BOD1	-0.227099	2.4355	up (Toledo)
MRFAP1	0.123676	1.12465	up (Toledo)
LTA4H	0.530487	2.88337	up (Toledo)
MVK	0.621785	2.20135	up (Toledo)
TFDP2	0.353811	2.10245	up (Toledo)
LYRM2	-0.215971	3.93644	up (Toledo)
HEBP2	-0.0171403	3.54813	up (Toledo)
SLIRP	-0.332248	1.72289	up (Toledo)
MRTO4	-0.176798	6.07577	up (Toledo)
SF3A3	-0.167584	1.71149	up (Toledo)
THYN1	-0.362067	4.90972	up (Toledo)
BABAM1	-0.49802	4.42864	up (Toledo)
TCTN1	0.0348773	1.41402	up (Toledo)
MEF2D	0.335533	2.71372	up (Toledo)
COQ10B	-0.80674	1.145	up (Toledo)
C1D	-0.528162	1.57555	up (Toledo)
PRDX6	-0.121419	1.1162	up (Toledo)
MFF	0.035574	2.59121	up (Toledo)
TRAFD1	-0.549698	1.54135	up (Toledo)
MRPL14	-0.350615	1.47187	up (Toledo)
COX20	0.0963538	3.99714	up (Toledo)
RASAL1	-0.679684	2.65622	up (Toledo)
ERO1B	-0.116904	1.26069	up (Toledo)
MAP1LC3B2	-0.313409	1.91053	up (Toledo)
AFTPH	-0.3153	1.32414	up (Toledo)
SLC41A3	0.0114919	1.84514	up (Toledo)
NT5C	-0.0664679	6.02632	up (Toledo)
RINL	0.657243	2.98341	up (Toledo)
EIF2S3	0.471832	1.67552	up (Toledo)
TMEM185B	0.457777	2.61069	up (Toledo)
YWHAB	-0.322658	1.57486	up (Toledo)
PXN	0.461772	1.50829	up (Toledo)
KLHL21	0.168249	3.94905	up (Toledo)
POP5	-0.606813	2.79124	up (Toledo)
ACADS	0.208759	1.04712	up (Toledo)
CENPV	0.108053	4.7825	up (Toledo)
COPZ1	-0.0387676	1.13479	up (Toledo)
IMP3	-0.0771516	7.34443	up (Toledo)
MGST3	0.313233	2.95375	up (Toledo)
RHOF	1.07406	0	up (OCI-LY19)
MCFD2	0.254316	1.38419	up (Toledo)
ZBED1	-0.413246	3.72408	up (Toledo)
FBXO46	0.721125	2.32346	up (Toledo)
OGFOD2	-0.43424	3.30142	up (Toledo)
MOSPD3	-0.116629	4.04024	up (Toledo)
WDR26	-1.21165	1.67446	up (Toledo)
STX3	-0.0821494	1.29659	up (Toledo)
TMEM30A	0.262743	1.53523	up (Toledo)
LRP10	0.147399	1.49826	up (Toledo)
TMED9	-0.00389893	2.10617	up (Toledo)
AHCY	0.0103432	2.21975	up (Toledo)
BRI3BP	-0.498383	1.79238	up (Toledo)
AACS	-0.902458	1.1499	up (Toledo)
AGPAT2	0.988342	2.38577	up (Toledo)
PYCARD	-0.625454	3.35754	up (Toledo)
DPH7	0.10219	1.51266	up (Toledo)
TNKS1BP1	0.717519	1.73941	up (Toledo)
PXMP2	-1.86594	2.81548	up (Toledo)
ZBED1	-0.156464	3.72408	up (Toledo)
RHEB	0.429078	1.4416	up (Toledo)
RMDN1	0.36634	1.64102	up (Toledo)
NDUFS4	-0.0817323	1.95639	up (Toledo)
RNPS1	-0.161426	2.06084	up (Toledo)
EPC1	-0.198764	1.26086	up (Toledo)
TUSC2	-0.518092	5.61002	up (Toledo)
LMAN2	-0.187761	3.00537	up (Toledo)
NOC2L	0.272152	4.29919	up (Toledo)
ZNF23	0.0221451	1.06441	up (Toledo)
LETM1	-0.0726465	2.61308	up (Toledo)
ELF1	-0.386469	1.33076	up (Toledo)
DNAJC5	-0.109537	2.21048	up (Toledo)
PLD6	-0.219593	2.46795	up (Toledo)
COA1	-0.113927	1.2604	up (Toledo)
FAM78A	0.0384095	1.90571	up (Toledo)
PPP6C	-0.182068	2.01034	up (Toledo)
RPL17	0.29615	1.29708	up (Toledo)
MAFG	0.521827	4.14995	up (Toledo)
NRAS	0.0968199	1.40645	up (Toledo)
ORMDL1	0.00868119	1.50367	up (Toledo)
ERV3-1	0.0622033	2.19283	up (Toledo)
NDUFA4	-0.179722	1.1877	up (Toledo)
AURKAIP1	-0.183999	1.27299	up (Toledo)
RPA3	-0.239584	2.6467	up (Toledo)
CCDC97	0.0492543	2.72873	up (Toledo)
MYPOP	-0.344308	3.40266	up (Toledo)
SLC25A15	-0.716722	3.00293	up (Toledo)
ADAM17	-0.14216	1.41471	up (Toledo)
FUNDC2	-0.254337	2.37774	up (Toledo)
RGCC	1.70461	0	up (OCI-LY19)
HMCES	0.249776	3.80813	up (Toledo)
COX6C	0.310316	3.04843	up (Toledo)
SLC25A30	0.384404	1.76081	up (Toledo)
TCEAL4	0.0201118	1.05539	up (Toledo)
ARFIP2	0.197287	1.05479	up (Toledo)
PPP4R1	-0.13676	1.35044	up (Toledo)
STK40	-0.0614172	2.23151	up (Toledo)
PRDM8	1.14021	0	up (OCI-LY19)
CTNS	-0.159953	1.02713	up (Toledo)
NEU1	0.488838	3.20201	up (Toledo)
RCBTB1	-0.408293	1.21028	up (Toledo)
RNF2	-0.0267125	1.27747	up (Toledo)
NEK3	0.598703	1.36252	up (Toledo)
RAB12	-0.420494	1.71367	up (Toledo)
SOX12	-0.0515749	5.41324	up (Toledo)
POLR2F	-0.0223479	2.35997	up (Toledo)
POU4F1	0.110774	4.69437	up (Toledo)
TIMM17B	-0.58277	2.09449	up (Toledo)
GNG7	0.509066	1.74292	up (Toledo)
C4orf3	0.217485	3.68921	up (Toledo)
ZIC5	0	1.94485	up (Toledo)
CD24	-0.00965711	1.15573	up (Toledo)
ZFAND3	0.207842	1.0404	up (Toledo)
H6PD	0.232889	2.56186	up (Toledo)
LIG4	-0.89282	1.53684	up (Toledo)
SOCS7	0.182758	1.18171	up (Toledo)
SFXN1	0.303738	1.7538	up (Toledo)
DIMT1	-0.343451	3.34492	up (Toledo)
SLC12A9	-0.0520955	1.18283	up (Toledo)
CLCN7	0.0973125	1.84762	up (Toledo)
TTC5	-0.939008	1.3659	up (Toledo)
TAF7	0.012361	1.66586	up (Toledo)
KLHL33	0	1.41994	up (Toledo)
NCOA3	-0.0366733	1.02264	up (Toledo)
CHMP1B	0.132345	2.23407	up (Toledo)
ANG	0	2.06853	up (Toledo)
TMUB2	-0.187889	3.6644	up (Toledo)
MED9	-0.448869	1.88382	up (Toledo)
LETMD1	0.0513155	2.32212	up (Toledo)
SAR1A	-0.485385	2.04465	up (Toledo)
REM2	-0.668451	2.72758	up (Toledo)
FTH1	-0.0123329	3.37283	up (Toledo)
MAPRE1	-0.022218	3.85865	up (Toledo)
JAGN1	0.225972	2.96663	up (Toledo)
BCL2L2	0.389867	2.90706	up (Toledo)
COX18	-0.135677	1.31631	up (Toledo)
RAB21	0.283683	1.8183	up (Toledo)
MSANTD3	0.438948	1.81986	up (Toledo)
ZNF219	0.546221	1.96033	up (Toledo)
TM9SF1	-0.159732	3.37269	up (Toledo)
TAB1	-0.316133	1.28365	up (Toledo)
PANK3	0.193134	1.76952	up (Toledo)
HMG20B	-0.308784	5.33674	up (Toledo)
RABGGTA	0.446648	2.09223	up (Toledo)
HERPUD1	0.292175	1.23709	up (Toledo)
SLC35E1	0.43974	2.59169	up (Toledo)
RIPK3	0	3.01446	up (Toledo)
NFATC4	0	2.56123	up (Toledo)
NYNRIN	0.0368735	1.79562	up (Toledo)
CBLN3	0.520193	1.41139	up (Toledo)
TXNDC11	-0.156436	1.24412	up (Toledo)
ZNF212	0.421409	1.54739	up (Toledo)
CRBN	0.0348533	1.88768	up (Toledo)
DAP3	0.166473	1.25981	up (Toledo)
TRMT10C	-0.00722536	4.3467	up (Toledo)
RAP1B	-0.505567	1.40242	up (Toledo)
SC5D	0.707027	1.13316	up (Toledo)
AP1AR	-0.127672	1.83269	up (Toledo)
CFL2	-0.126324	1.78413	up (Toledo)
NDUFS8	-0.579986	2.79591	up (Toledo)
TRAPPC6B	-0.272938	1.25193	up (Toledo)
COX19	-0.241676	4.00964	up (Toledo)
GFOD2	0.390075	1.31388	up (Toledo)
MRPL53	-0.263249	1.07484	up (Toledo)
KIF1C	-0.165733	1.56681	up (Toledo)
GLTP	0.221158	1.1357	up (Toledo)
POM121	0.0769055	1.15615	up (Toledo)
MGAT2	-0.402386	3.72692	up (Toledo)
MSL2	-0.0201248	2.46469	up (Toledo)
TARS2	0.0840023	2.38974	up (Toledo)
FRMD8	-0.0152558	1.072	up (Toledo)
YWHAZ	0.164724	1.13808	up (Toledo)
NDUFB4	-0.210307	7.09983	up (Toledo)
CDKN2AIP	-0.416077	1.18167	up (Toledo)
CGRRF1	-0.0263605	1.15089	up (Toledo)
EAF1	0.00969773	1.73597	up (Toledo)
SH3GLB2	-0.15905	2.52544	up (Toledo)
PELI2	-0.352426	1.04567	up (Toledo)
RASSF5	-0.147075	1.85021	up (Toledo)
AP5M1	-0.547993	1.63443	up (Toledo)
PUS3	-0.111686	2.26982	up (Toledo)
USP38	-0.0567899	1.2946	up (Toledo)
DACT1	-0.221679	2.36495	up (Toledo)
NDUFS6	-0.683663	2.11301	up (Toledo)
CCDC175	1.06423	0	up (OCI-LY19)
GMPR2	0.117966	3.61956	up (Toledo)
ZNF410	-0.278882	2.28969	up (Toledo)
PER1	0.418906	2.25284	up (Toledo)
PPP1R36	1.3737	0	up (OCI-LY19)
ZCRB1	-0.366438	4.0855	up (Toledo)
NR2C2AP	-0.337599	2.73639	up (Toledo)
ATP6V1D	-0.253279	1.68108	up (Toledo)
GLRX	0.399553	1.6405	up (Toledo)
PIGH	-0.642616	1.4063	up (Toledo)
DYNC1LI2	-0.0373367	1.7439	up (Toledo)
CCNT1	-0.0503347	2.46474	up (Toledo)
GNL1	0.190689	3.47941	up (Toledo)
SNN	-0.496497	3.79388	up (Toledo)
NUCB1	-0.132545	2.20197	up (Toledo)
FAM204A	-0.337465	1.00878	up (Toledo)
USP19	0.0153432	3.62183	up (Toledo)
FAM120AOS	0.396086	2.96288	up (Toledo)
FBXW11	0.483704	1.09704	up (Toledo)
GLCCI1	-0.501744	2.41411	up (Toledo)
COX7A2	-0.702615	2.65652	up (Toledo)
ACOT4	1.08523	0	up (OCI-LY19)
DNAL1	-0.15855	1.04553	up (Toledo)
PNMA1	0.262004	3.91664	up (Toledo)
RPP25L	-0.494417	2.63384	up (Toledo)
PIGS	0.273451	3.47271	up (Toledo)
HGSNAT	0.707126	1.47509	up (Toledo)
SNX6	-0.26018	1.50259	up (Toledo)
BLMH	0.0528846	3.46899	up (Toledo)
SHOC2	-0.215884	2.01867	up (Toledo)
ZC2HC1C	0	1.04143	up (Toledo)
RAB5C	-0.720034	4.06155	up (Toledo)
TRAM1	0.221831	2.4694	up (Toledo)
DNAJA2	-0.315347	1.3768	up (Toledo)
ANGEL1	0.0888621	1.63528	up (Toledo)
RASSF2	0.0909678	1.09493	up (Toledo)
BLOC1S6	-0.154119	1.93037	up (Toledo)
PSME3	-0.615856	1.02208	up (Toledo)
KLF3	0.0202625	1.46471	up (Toledo)
JMY	0.172063	1.00079	up (Toledo)
HDGF	-0.267559	3.83689	up (Toledo)
TOMM40L	-0.128124	1.25276	up (Toledo)
VAPA	0.0731995	1.06497	up (Toledo)
UBQLN1	-0.050601	2.58002	up (Toledo)
UPF1	-0.239945	2.60583	up (Toledo)
PRNP	-0.0250356	2.80667	up (Toledo)
RCOR3	-0.346733	2.07756	up (Toledo)
UNC119B	0.0338783	3.63692	up (Toledo)
RHOQ	-0.0690616	1.18805	up (Toledo)
ECSIT	-0.650057	2.20558	up (Toledo)
UTP14A	-0.0266039	3.27568	up (Toledo)
UFM1	0.0940283	4.47058	up (Toledo)
MAGOH	-0.514294	1.29488	up (Toledo)
MAPKAPK2	0.434581	1.39387	up (Toledo)
NDUFA2	-0.736104	4.63136	up (Toledo)
ANKRD9	-0.284344	3.00242	up (Toledo)
AMN	0.243397	2.34135	up (Toledo)
CDC42BPB	-0.322805	1.06177	up (Toledo)
TNFAIP2	0.0686287	1.26723	up (Toledo)
CKB	0.277031	6.10027	up (Toledo)
R3HDM4	-0.452187	1.77352	up (Toledo)
DPM1	0.104465	2.61447	up (Toledo)
ISCA1	-0.306753	2.10913	up (Toledo)
SEC11C	0.178085	4.01506	up (Toledo)
BACH2	-0.438179	1.05178	up (Toledo)
ZBTB42	-0.219354	3.90948	up (Toledo)
CEP170B	-0.0576336	1.04198	up (Toledo)
FBXL15	-0.446725	5.98955	up (Toledo)
GPR132	-0.754993	1.16324	up (Toledo)
IL6ST	-1.01326	1.01129	up (Toledo)
MTMR6	-0.34804	1.24597	up (Toledo)
APEX1	0.497887	2.46341	up (Toledo)
CRIP2	-0.525342	1.97465	up (Toledo)
TMEM121	1.92227	2.67305	up (both)
RBMXL1	0.344696	2.0451	up (Toledo)
TIMM17A	-0.0594781	4.00181	up (Toledo)
ZNF75A	0.309104	1.94928	up (Toledo)
FLAD1	-0.276415	4.60759	up (Toledo)
SNURF	1.80289	0.447951	up (OCI-LY19)
CNOT8	-0.00258545	3.33126	up (Toledo)
ZNF747	0.51921	3.69253	up (Toledo)
GNB1	-0.0873172	1.54181	up (Toledo)
SKIL	-0.242224	1.18959	up (Toledo)
FAN1	0.808034	1.10085	up (Toledo)
ZNF507	-0.158955	1.14562	up (Toledo)
CACTIN	-0.390088	2.11953	up (Toledo)
AGO4	-0.245913	1.31973	up (Toledo)
VAPB	0.255225	1.10572	up (Toledo)
CRLS1	0.160156	1.87606	up (Toledo)
NFYC	-0.188919	2.16273	up (Toledo)
INAFM2	-0.303726	1.51486	up (Toledo)
GPATCH3	0.137678	2.27372	up (Toledo)
DNTTIP1	-0.130003	2.58379	up (Toledo)
ACBD3	0.0868337	1.78821	up (Toledo)
IFT27	0.818571	1.11159	up (Toledo)
RHOV	-0.458372	2.39956	up (Toledo)
MMGT1	0.0844881	2.54522	up (Toledo)
CLEC2B	0.269916	1.34789	up (Toledo)
FDX1	-0.0842747	1.95174	up (Toledo)
AP3S1	-0.18634	1.7277	up (Toledo)
NDUFAF1	0.434099	1.14606	up (Toledo)
TMEM203	-0.290264	4.28305	up (Toledo)
ESD	0.160501	1.63278	up (Toledo)
TIMM10	-0.974495	2.90156	up (Toledo)
UBXN7	-0.0358408	1.9403	up (Toledo)
AAGAB	-0.378081	3.73657	up (Toledo)
LCMT2	-1.3739	1.45799	up (Toledo)
CIZ1	-0.0552566	2.28814	up (Toledo)
RRP36	-0.547577	3.05542	up (Toledo)
IRF7	-0.830912	4.66855	up (Toledo)
MAP1A	-0.00871369	2.89991	up (Toledo)
REPIN1	-0.489257	1.13744	up (Toledo)
TMEM220	-0.164712	1.21832	up (Toledo)
MRPS16	-0.178579	4.58333	up (Toledo)
DRAP1	-0.237944	5.22754	up (Toledo)
MCRS1	-0.45486	4.78018	up (Toledo)
SPATA5L1	-0.257341	1.70702	up (Toledo)
TRMT61A	-0.415788	2.98547	up (Toledo)
PDE4A	0.335443	1.00825	up (Toledo)
EXOSC1	0.125292	3.17716	up (Toledo)
DTWD1	-0.336812	1.52562	up (Toledo)
TGIF2	0.42303	2.80333	up (Toledo)
SPPL2A	-0.128146	1.38269	up (Toledo)
LYSMD2	1.05904	0	up (OCI-LY19)
MOCS2	-0.0788781	1.27017	up (Toledo)
MRPL16	-0.286109	1.54484	up (Toledo)
SRP72	-0.00235714	3.06091	up (Toledo)
MRPS15	-0.249917	1.6067	up (Toledo)
ARL14EP	0.131966	4.27415	up (Toledo)
ZNF280D	1.34369	0.288821	up (OCI-LY19)
TMC8	1.19727	-0.605169	up (OCI-LY19)
TATDN1	1.79817	-1.76592	up (OCI-LY19)
PTPN11	-0.153046	1.41795	up (Toledo)
TBC1D25	-0.180249	2.07332	up (Toledo)
NDUFA3	-0.195433	1.748	up (Toledo)
RRAGA	-0.480571	6.90582	up (Toledo)
ZNF22	-0.116381	4.61509	up (Toledo)
TPM1	-0.945876	1.05402	up (Toledo)
IER3IP1	0.202266	2.82737	up (Toledo)
PNPT1	0.100569	1.08923	up (Toledo)
FERMT3	0.121506	3.82299	up (Toledo)
DCAF16	-0.288778	2.79511	up (Toledo)
COPS7A	0.151077	4.02253	up (Toledo)
TOMM40	-0.259836	3.71154	up (Toledo)
DBN1	-0.0856319	2.04663	up (Toledo)
DNAJC12	1.24639	0.357284	up (OCI-LY19)
UBAP1L	1.2164	0	up (OCI-LY19)
INSR	-0.246557	1.2667	up (Toledo)
NPM1	0.144671	1.88568	up (Toledo)
PSMB9	-0.401254	2.87752	up (Toledo)
ZHX1	0.292404	1.47864	up (Toledo)
EXOC1	0.598243	1.36702	up (Toledo)
SARAF	0.608832	2.67567	up (Toledo)
PCMTD2	-0.0403363	2.03629	up (Toledo)
DNAJB11	0.0176811	1.09593	up (Toledo)
ZNF598	-0.198751	4.46566	up (Toledo)
ZBTB10	0.292802	2.2513	up (Toledo)
MAPK1IP1L	0.167229	2.30351	up (Toledo)
NAB2	0.153236	3.56878	up (Toledo)
MPI	-0.0121839	1.61264	up (Toledo)
SZRD1	-0.264101	1.87669	up (Toledo)
RPP25	0	3.32067	up (Toledo)
SCAMP5	-0.158984	1.16977	up (Toledo)
TAP1	-0.305534	3.84058	up (Toledo)
RPUSD1	-0.257795	3.37618	up (Toledo)
RAD23B	-0.0627002	1.04056	up (Toledo)
METTL3	0.147248	2.14947	up (Toledo)
RNASEH1	-0.337545	3.34995	up (Toledo)
SFXN4	-0.0866092	1.24391	up (Toledo)
STRAP	-0.029829	1.74856	up (Toledo)
YTHDF3	0.0784139	1.20358	up (Toledo)
SPRTN	-0.743312	2.41661	up (Toledo)
SAP30L	-0.291241	2.25954	up (Toledo)
CTSH	-1.35444	1.56731	up (Toledo)
ING1	-0.319165	2.52557	up (Toledo)
BCL2A1	-0.396903	1.70684	up (Toledo)
ULK3	-0.290858	2.89648	up (Toledo)
ASB6	-0.0293185	2.74973	up (Toledo)
PSMD6	0.312306	2.84579	up (Toledo)
MEX3B	0.501025	2.70095	up (Toledo)
CDC25B	-0.10839	1.6762	up (Toledo)
SOD1	-0.146904	2.65017	up (Toledo)
EIF3M	0.29318	2.99476	up (Toledo)
TMEM205	0.0298266	4.61453	up (Toledo)
SERINC2	1.42709	1.34735	up (both)
GOLGA6L4	-0.202626	1.08881	up (Toledo)
NMB	0.646979	5.85208	up (Toledo)
YWHAE	-0.161719	2.38998	up (Toledo)
UBFD1	0.083813	1.49332	up (Toledo)
ISCA2	-0.063342	4.39521	up (Toledo)
HAPLN3	0	1.4224	up (Toledo)
MFGE8	-0.956297	2.12236	up (Toledo)
CKLF	0.419112	1.29857	up (Toledo)
SEMA4B	-0.54329	1.17967	up (Toledo)
SEC61B	-0.205051	2.42235	up (Toledo)
COMMD6	0.0725255	1.48372	up (Toledo)
HM13	-0.384634	2.59395	up (Toledo)
FURIN	0.401429	1.97044	up (Toledo)
ZNF511	-0.0829773	2.80316	up (Toledo)
GPN1	-0.381665	1.22488	up (Toledo)
TMEM126A	0.233948	2.72097	up (Toledo)
SAV1	0.0925871	1.33924	up (Toledo)
MRPL44	0.0314497	2.45552	up (Toledo)
CDC42SE1	-0.0234082	3.62195	up (Toledo)
METTL9	-0.264589	2.29935	up (Toledo)
GNG5	-0.14076	1.82702	up (Toledo)
PDIA2	0	2.80162	up (Toledo)
MRPL28	-0.574672	4.78817	up (Toledo)
IMPA2	0.00760165	1.07834	up (Toledo)
NHLRC4	0.074744	1.02918	up (Toledo)
DCAF5	0.4697	1.82134	up (Toledo)
MRPL11	-0.45988	1.24785	up (Toledo)
IRGQ	-0.251244	1.80613	up (Toledo)
WDR24	-0.151248	3.15851	up (Toledo)
FBXL16	0.298236	1.39194	up (Toledo)
METRN	1.00545	1.44045	up (both)
POLDIP3	-0.0194712	3.27923	up (Toledo)
OGDH	-0.641413	1.37053	up (Toledo)
SLC25A36	0.0923898	2.36724	up (Toledo)
NIPSNAP3A	-0.131725	3.23918	up (Toledo)
SAMD10	0.848597	3.59253	up (Toledo)
UBALD1	0.180365	2.61101	up (Toledo)
SUGP1	-0.294909	1.87514	up (Toledo)
FAHD1	0.140945	1.51663	up (Toledo)
MSRB1	0.462122	2.10547	up (Toledo)
SERF2	-0.582118	1.06265	up (Toledo)
TBL3	-0.588339	2.02117	up (Toledo)
SYNGR3	0	3.64858	up (Toledo)
UNC93B1	-0.230714	2.29955	up (Toledo)
RABL2A	-0.306901	1.93113	up (Toledo)
COMMD2	-0.275106	3.97373	up (Toledo)
RCC2	-0.0869049	2.0992	up (Toledo)
AMDHD2	0.125171	2.43837	up (Toledo)
ZNF7	0.261217	2.77126	up (Toledo)
FLYWCH2	-0.443644	1.87557	up (Toledo)
KREMEN2	0	6.28417	up (Toledo)
NCBP2	-0.209445	1.13686	up (Toledo)
BZW2	0.159784	1.52363	up (Toledo)
THOC6	0.168871	2.74378	up (Toledo)
EMC6	-0.220675	5.67871	up (Toledo)
ZNF174	-0.399506	3.26148	up (Toledo)
PGRMC2	0.255494	1.74419	up (Toledo)
SUPT7L	-0.112333	2.02849	up (Toledo)
MRPS22	0.0238775	2.79004	up (Toledo)
KAT7	-0.319427	1.98054	up (Toledo)
SRL	0	1.64316	up (Toledo)
RABL2B	-0.278804	2.10267	up (Toledo)
GLIS2	-0.605007	1.43574	up (Toledo)
PAM16	0.242792	1.09218	up (Toledo)
PHC2	-0.669724	1.96463	up (Toledo)
SP1	0.198841	2.6976	up (Toledo)
FAM53C	-0.385587	2.44693	up (Toledo)
ZNF766	-0.18691	1.32493	up (Toledo)
SAP18	-0.333508	5.76098	up (Toledo)
CYP2R1	0.799603	2.9576	up (Toledo)
SOCS1	0.416348	5.6246	up (Toledo)
SUMO2	-0.142383	3.61966	up (Toledo)
GLRX3	-0.0309848	1.64701	up (Toledo)
PSMA5	0.15885	1.38136	up (Toledo)
TNFRSF17	-0.622668	2.61802	up (Toledo)
SYVN1	-0.431358	3.47563	up (Toledo)
MRPS18C	-0.414653	1.28776	up (Toledo)
TAF12	0.18844	1.01396	up (Toledo)
ELK4	0.0355037	2.89288	up (Toledo)
MGAT1	0.0722028	2.96542	up (Toledo)
DDA1	-0.0775301	4.39937	up (Toledo)
FBXO33	-0.344218	1.07503	up (Toledo)
EMC8	-0.311886	3.54381	up (Toledo)
SLC1A5	0.336569	3.93231	up (Toledo)
NDUFV2	-0.448279	1.27573	up (Toledo)
FBXO21	-0.293401	1.19691	up (Toledo)
ITGAE	-0.0796594	1.29797	up (Toledo)
CLASRP	0.0129851	1.28354	up (Toledo)
ZNF276	0.0789754	2.28946	up (Toledo)
ATOX1	-0.179182	3.93905	up (Toledo)
HTATSF1	-0.0410568	3.87427	up (Toledo)
NUP188	0.178188	1.95966	up (Toledo)
LYRM1	-0.419621	1.07091	up (Toledo)
ZC3H7B	0.405499	1.38033	up (Toledo)
USP3	-0.151156	1.0262	up (Toledo)
PCK2	-0.5678	4.34692	up (Toledo)
ARPC5	-0.333199	1.30254	up (Toledo)
MAPK8IP3	0.0916159	1.36142	up (Toledo)
ATRAID	-0.466302	5.7098	up (Toledo)
PISD	0.0808243	1.34445	up (Toledo)
SAT1	-0.0170371	5.69572	up (Toledo)
PASK	0.785788	2.1083	up (Toledo)
SULT1A1	1.01	0	up (OCI-LY19)
TBC1D20	0.293464	2.6543	up (Toledo)
ABCB7	0.0909911	1.02779	up (Toledo)
SPNS1	-0.783948	1.49423	up (Toledo)
LAT	0.509715	1.4885	up (Toledo)
PYGO2	-0.0557096	4.91022	up (Toledo)
MLLT6	-0.0011683	1.04236	up (Toledo)
GATAD1	0.120252	1.56635	up (Toledo)
MRPS2	-0.181864	4.17064	up (Toledo)
RPS6KB1	0.117902	1.03243	up (Toledo)
QPRT	-0.176226	2.94768	up (Toledo)
C16orf54	0.497682	2.67569	up (Toledo)
C4orf48	-0.479883	1.71109	up (Toledo)
TAOK2	-0.0165025	1.81302	up (Toledo)
HIRIP3	-0.983783	4.33816	up (Toledo)
CHMP5	-0.317479	2.06025	up (Toledo)
TBX6	0.154294	1.39004	up (Toledo)
GDPD3	0.58848	3.08342	up (Toledo)
DEDD	-0.012157	2.19092	up (Toledo)
TRPT1	-0.0841539	3.12557	up (Toledo)
FOXJ2	0.126995	2.67406	up (Toledo)
HMOX2	0.130749	2.21423	up (Toledo)
RAB2B	0.103901	1.951	up (Toledo)
PMVK	-0.0997852	3.47934	up (Toledo)
APPBP2	-0.420295	1.17547	up (Toledo)
TIPRL	-0.0603518	2.37012	up (Toledo)
CMTM3	-0.323317	3.30212	up (Toledo)
CSNK2A1	-0.206213	2.02207	up (Toledo)
PRSS53	0.138051	1.31668	up (Toledo)
PRPF38A	0.0403312	2.93125	up (Toledo)
HEXA	0.184987	1.37901	up (Toledo)
TCEAL1	0.0588428	4.00549	up (Toledo)
PBDC1	0.219138	4.11172	up (Toledo)
ATG2A	0.596792	1.91254	up (Toledo)
DLAT	0.270802	1.01398	up (Toledo)
PYCR1	0.192853	1.57569	up (Toledo)
ING2	-0.0457784	3.48537	up (Toledo)
RPS6KA3	-0.0958522	1.4971	up (Toledo)
FBXO7	-0.130531	3.06013	up (Toledo)
COPG1	0.597324	1.56739	up (Toledo)
HEATR3	-0.153318	1.56389	up (Toledo)
GNAS	0.0846462	2.8656	up (Toledo)
SNX20	0.342559	1.07818	up (Toledo)
ZPR1	0.268568	1.29556	up (Toledo)
ZNF48	-0.147166	2.584	up (Toledo)
PSMA1	0.0365491	1.98146	up (Toledo)
CCNG2	-0.0455971	3.43414	up (Toledo)
NDUFB6	0.0705227	2.67843	up (Toledo)
YEATS4	-0.447312	2.60443	up (Toledo)
MT1G	0.00610764	7.81205	up (Toledo)
MT1H	2.93745	5.05225	up (both)
HCFC1R1	0.390011	6.59864	up (Toledo)
ZNF33A	-0.0639926	1.16081	up (Toledo)
COQ9	-0.181715	2.04727	up (Toledo)
STAT2	-0.627272	3.16359	up (Toledo)
CCDC102A	0.323334	1.36924	up (Toledo)
EID2	-0.245784	6.12223	up (Toledo)
NGDN	-0.333931	3.32176	up (Toledo)
SLC38A7	-0.210456	1.70653	up (Toledo)
GOLT1B	0.100388	1.26546	up (Toledo)
RNF138	0.175036	1.45529	up (Toledo)
CREB1	-0.0799488	2.00654	up (Toledo)
C1orf131	-0.12336	4.27404	up (Toledo)
CBX6	0.702988	4.96085	up (Toledo)
SSR3	-0.163003	3.41547	up (Toledo)
NOL3	-0.648575	1.66023	up (Toledo)
SERP1	0.0336772	2.48606	up (Toledo)
NDUFC1	-0.129372	2.63559	up (Toledo)
ZMAT3	-0.629423	1.95171	up (Toledo)
ENKD1	-0.100486	5.30756	up (Toledo)
RMDN3	0.0391349	2.22576	up (Toledo)
SLC12A4	-0.0906087	1.24894	up (Toledo)
SNRPF	-0.0722995	4.20941	up (Toledo)
TRIM38	0.305518	2.15795	up (Toledo)
TTC1	-0.28091	2.25288	up (Toledo)
DUSP12	0.0281372	2.28828	up (Toledo)
SETD6	0.157855	3.59174	up (Toledo)
TP53BP2	-0.091456	2.21331	up (Toledo)
PIP4K2B	0.374438	2.82242	up (Toledo)
NUDT1	-0.40118	1.32238	up (Toledo)
SNRPA1	0.0317303	2.42557	up (Toledo)
KLHL36	-0.0356883	2.80153	up (Toledo)
ADAT2	0.354686	2.07923	up (Toledo)
ZEB2	-0.265015	1.27116	up (Toledo)
FANCF	-0.31122	3.87342	up (Toledo)
CMTR1	-0.326056	1.08871	up (Toledo)
ZNF668	-0.159122	1.87886	up (Toledo)
BRPF1	-0.145794	1.24472	up (Toledo)
ATXN1L	-0.25382	1.76468	up (Toledo)
ZNF821	-0.480514	1.5575	up (Toledo)
ANKRD40	0.290002	2.89225	up (Toledo)
ARF6	-0.498963	1.21766	up (Toledo)
RBM23	-0.12242	2.29899	up (Toledo)
MRPS23	0.0523559	3.24689	up (Toledo)
SNAPIN	-0.37109	1.01139	up (Toledo)
CHST5	-0.120545	2.16287	up (Toledo)
TMEM231	-0.0950738	1.34914	up (Toledo)
YIF1A	-0.0324956	2.66042	up (Toledo)
CDYL2	1.1492	0	up (OCI-LY19)
PKN1	-0.21974	1.45866	up (Toledo)
LLPH	-0.452192	4.33213	up (Toledo)
RPP40	0.271631	1.98613	up (Toledo)
MLYCD	-0.521906	1.05904	up (Toledo)
TMED2	0.252921	3.50921	up (Toledo)
CALU	-0.428311	3.8241	up (Toledo)
ISCU	-0.0642315	3.59036	up (Toledo)
CASC3	-0.179404	2.10744	up (Toledo)
SDHAF2	-0.457557	2.3969	up (Toledo)
C1orf122	-0.235498	6.32947	up (Toledo)
MTHFSD	-0.722981	1.28204	up (Toledo)
C16orf95	0.77722	2.34779	up (Toledo)
STK35	0.162104	1.22136	up (Toledo)
MVD	1.21225	2.27387	up (both)
TMEM65	0.810245	1.4237	up (Toledo)
SNAP23	0.0766153	1.64264	up (Toledo)
FABP5	-0.0545751	2.81597	up (Toledo)
PSMD11	-0.101959	1.75371	up (Toledo)
DHX30	-0.263637	1.3559	up (Toledo)
ZNF778	0.370738	1.34135	up (Toledo)
SRSF2	-0.40094	1.43093	up (Toledo)
TEX261	-0.0852004	1.05452	up (Toledo)
C22orf39	0.162704	3.4418	up (Toledo)
SPATA2L	0.0461598	1.70578	up (Toledo)
CDCA7L	-0.0191806	2.43785	up (Toledo)
GTSF1	-0.395331	2.05627	up (Toledo)
HNRNPAB	-0.436854	1.1476	up (Toledo)
ARHGAP23	-0.50308	1.31651	up (Toledo)
ANKRD39	-0.0641305	1.8423	up (Toledo)
RILP	1.06115	2.69246	up (both)
WDR81	-0.117763	1.12796	up (Toledo)
HAUS2	0.0400267	2.858	up (Toledo)
KBTBD2	-0.241	2.78053	up (Toledo)
TMEM138	0.191759	2.6361	up (Toledo)
OLA1	0.0139065	1.36374	up (Toledo)
COMMD3	-0.332885	4.5877	up (Toledo)
NXT1	-0.257508	5.68459	up (Toledo)
P2RX5	1.17837	-2.11337	up (OCI-LY19)
SNF8	-0.317573	3.50044	up (Toledo)
ELFN2	1.76023	0.20698	up (OCI-LY19)
AGFG1	-0.399253	1.44215	up (Toledo)
ARHGEF40	0.442396	1.22762	up (Toledo)
TPM4	-0.00867901	4.36046	up (Toledo)
MAPK1	0.292359	1.17128	up (Toledo)
CHUK	0.050543	1.29151	up (Toledo)
MORF4L1	-0.315763	3.89858	up (Toledo)
C15orf61	-0.411533	1.22398	up (Toledo)
ZNF281	-0.166848	3.39268	up (Toledo)
RNF167	-0.303908	1.80626	up (Toledo)
TRMT112	-0.198851	1.43338	up (Toledo)
CAMTA2	-0.129792	1.29237	up (Toledo)
ZNF146	0.79231	3.32503	up (Toledo)
SMPD4	-0.124692	1.31034	up (Toledo)
UQCRHL	-0.249102	7.13286	up (Toledo)
RWDD4	0.0712553	1.6926	up (Toledo)
CDIPT	-0.239599	3.6083	up (Toledo)
SMIM7	-0.322098	3.1577	up (Toledo)
PHF12	0.099955	2.4151	up (Toledo)
RGS16	0.667291	1.0201	up (Toledo)
POLR2J	-0.307567	4.87096	up (Toledo)
NEURL4	0.145167	1.17694	up (Toledo)
ACAP1	0.764107	1.80158	up (Toledo)
ESRRA	-0.233498	3.94241	up (Toledo)
IGLL5	3.0719	0	up (OCI-LY19)
TMEM102	0	2.98724	up (Toledo)
ZNF646	0.128049	1.43121	up (Toledo)
ZNF226	0.555864	1.19008	up (Toledo)
E2F4	-0.704401	3.96798	up (Toledo)
KDM6B	0.0914044	1.28275	up (Toledo)
RMND5A	-0.206997	1.56947	up (Toledo)
KCNAB3	0.183839	1.84537	up (Toledo)
CCDC50	0.274166	1.18045	up (Toledo)
HES7	1.07474	2.1712	up (both)
HMGN4	0.013913	4.10771	up (Toledo)
DDX49	-0.169174	4.40673	up (Toledo)
SNRPD1	-0.174942	2.08193	up (Toledo)
LRRC42	-0.409641	1.47637	up (Toledo)
MRPL4	-0.340194	3.4356	up (Toledo)
PSMB4	-0.267442	1.08311	up (Toledo)
DNAJC3	0.08348	1.05522	up (Toledo)
PRPF4	0.0947174	2.82903	up (Toledo)
TNFRSF13B	-2.52804	-3.77192	down (both)
FLCN	0.200031	2.50135	up (Toledo)
USE1	-0.0785799	3.26277	up (Toledo)
MKRN2	0.305241	1.40007	up (Toledo)
DNAJC7	-0.0205881	1.61296	up (Toledo)
ATPAF2	-0.558574	2.06708	up (Toledo)
PHAX	-0.299075	1.72378	up (Toledo)
HSBP1	-0.121919	4.19126	up (Toledo)
MIEF2	0.592803	1.25927	up (Toledo)
RSL1D1	0.327708	2.05417	up (Toledo)
HIPK2	0.0428692	1.12768	up (Toledo)
YTHDF2	0.116945	1.10989	up (Toledo)
EPN2	0.470682	1.59199	up (Toledo)
MAPK7	-0.436329	3.60709	up (Toledo)
MFAP4	-0.513554	3.68728	up (Toledo)
ALDH3A2	0.834495	1.59655	up (Toledo)
STX6	0.135225	1.70007	up (Toledo)
FAM162A	0.253846	1.80816	up (Toledo)
NOS2	1.08708	0	up (OCI-LY19)
LYRM9	0.544046	2.02889	up (Toledo)
EXOSC5	0.0873227	1.60707	up (Toledo)
HNRNPA1L2	0.0630402	1.11694	up (Toledo)
CUEDC2	-0.0694585	4.07839	up (Toledo)
TMEM41A	-0.0561636	3.00959	up (Toledo)
PSMB3	-0.578248	1.22323	up (Toledo)
RAB34	0.537053	2.24806	up (Toledo)
DNAJC16	0.341245	1.36185	up (Toledo)
DUSP1	-1.00808	2.86253	up (Toledo)
NEK8	0.0633658	3.39045	up (Toledo)
ERAL1	0.275694	4.31246	up (Toledo)
SIRT1	-0.0564515	2.38249	up (Toledo)
SURF4	-0.0744185	4.90301	up (Toledo)
SEPHS2	-0.0281108	1.85596	up (Toledo)
LAPTM4A	0.0291341	3.95031	up (Toledo)
DTX3L	-0.0257809	3.40387	up (Toledo)
PPRC1	-0.0335306	2.04358	up (Toledo)
TRAF4	0.19972	5.96789	up (Toledo)
GMEB1	-0.563784	2.0184	up (Toledo)
STK11IP	-0.545793	1.86761	up (Toledo)
SLC25A28	-0.290193	1.20329	up (Toledo)
ERLIN2	0.307102	1.41447	up (Toledo)
THOC7	-0.107758	2.81346	up (Toledo)
EIF1AD	0.223376	3.34505	up (Toledo)
RAD51D	0.534562	1.63721	up (Toledo)
IREB2	-0.096458	1.8133	up (Toledo)
TTC19	0.0597399	1.41854	up (Toledo)
C17orf50	1.23757	0	up (OCI-LY19)
WBP11	-0.0808033	3.24549	up (Toledo)
CCL4L2	1.49067	0	up (OCI-LY19)
LSM10	-0.543879	4.05751	up (Toledo)
ATF1	0.360568	1.59549	up (Toledo)
BOLA3	-0.401343	1.27885	up (Toledo)
TADA2A	0.213487	1.31347	up (Toledo)
IL7R	-1.5019	1.77243	up (Toledo)
CPNE3	0.677329	1.65469	up (Toledo)
MTF1	-0.0490015	1.30375	up (Toledo)
RNF44	-0.174601	4.20289	up (Toledo)
GABARAPL2	-0.0425747	2.69799	up (Toledo)
RTCB	-0.270605	1.61691	up (Toledo)
ING4	-0.554373	2.78735	up (Toledo)
LSM8	-0.0967576	4.49708	up (Toledo)
POLR2B	9.95103e-05	1.86979	up (Toledo)
THRA	-0.785193	1.32016	up (Toledo)
ZBTB43	-0.475039	2.07124	up (Toledo)
KRTAP4-12	1.09442	0	up (OCI-LY19)
SF3B6	-0.178227	4.72409	up (Toledo)
P3H4	-0.903642	2.08474	up (Toledo)
PRKRA	-0.103681	2.87606	up (Toledo)
KLHL11	-0.596063	1.3557	up (Toledo)
ABCF2	-0.22161	1.57033	up (Toledo)
PPIE	-0.375786	3.49015	up (Toledo)
SMG7	-0.317735	1.30861	up (Toledo)
IPO5	-0.348823	1.21121	up (Toledo)
GHDC	0.101433	3.40446	up (Toledo)
CCNG1	0.0952789	2.791	up (Toledo)
SMIM20	0.45059	2.57548	up (Toledo)
PRKAB1	-0.588396	2.8849	up (Toledo)
IRF2BP2	-0.19955	1.79717	up (Toledo)
SUPT5H	0.140328	3.0209	up (Toledo)
TUBG2	-0.983773	1.98753	up (Toledo)
PLEKHH3	-0.357949	1.15255	up (Toledo)
GPX7	-0.174593	2.7009	up (Toledo)
NRN1	1.4729	2.23945	up (both)
ARL4D	0.232825	3.79634	up (Toledo)
HMGXB3	-0.0690952	1.22927	up (Toledo)
DDX39A	-0.213287	3.71836	up (Toledo)
CUL4B	-0.0294554	1.74559	up (Toledo)
FAM171A2	0	2.80971	up (Toledo)
SEC24C	0.487216	2.85057	up (Toledo)
CHID1	-0.369779	1.94126	up (Toledo)
ACBD4	0.156867	1.34811	up (Toledo)
HNRNPK	-0.388195	1.53082	up (Toledo)
PLEKHM1	-0.470726	1.27786	up (Toledo)
DNAJC14	-0.239022	2.71394	up (Toledo)
SYPL1	0.538392	2.39558	up (Toledo)
PUS7L	0.223814	1.69937	up (Toledo)
KRAS	-0.254476	2.95387	up (Toledo)
COQ6	0.101257	2.80837	up (Toledo)
MYL4	0	1.23686	up (Toledo)
CPNE2	0.411911	1.06178	up (Toledo)
TBKBP1	0.558087	1.10587	up (Toledo)
SETD1B	-0.405341	2.6381	up (Toledo)
ZC3H15	-0.113237	2.52386	up (Toledo)
WDR54	0.0261913	4.23402	up (Toledo)
HOXB7	-0.0791298	1.37738	up (Toledo)
DNAAF2	-0.110116	1.53006	up (Toledo)
SDK2	1.35955	0	up (OCI-LY19)
STX10	0.11856	3.74199	up (Toledo)
BBC3	-1.16801	5.16572	up (Toledo)
FAM117A	-3.8395	-1.20069	down (both)
PDK2	-0.7601	2.72413	up (Toledo)
PPP1R9B	-1.00182	2.10116	up (Toledo)
MFSD3	0.0963028	4.16051	up (Toledo)
FBXO45	-0.375924	3.34356	up (Toledo)
TOB1	0.121133	2.49944	up (Toledo)
CSTF2T	-0.235339	5.06561	up (Toledo)
NME2	0.467283	1.59376	up (Toledo)
CHRAC1	0.104246	4.34391	up (Toledo)
WDR83	0.488265	2.92732	up (Toledo)
DIABLO	0.0363456	3.19364	up (Toledo)
MKS1	-0.721401	1.58589	up (Toledo)
SEC23B	0.187369	1.58761	up (Toledo)
TARDBP	-0.332008	1.128	up (Toledo)
POLR3C	0.445558	1.84178	up (Toledo)
VRK3	-0.377411	1.2175	up (Toledo)
C1orf56	-0.020794	4.51734	up (Toledo)
PHF8	-0.262503	1.21614	up (Toledo)
RAB18	-0.136872	1.76219	up (Toledo)
TMEM127	-0.221049	3.26321	up (Toledo)
METTL2A	0.306815	1.91442	up (Toledo)
SUB1	-0.20748	1.14133	up (Toledo)
CYB561	1.20996	0.929259	up (OCI-LY19)
AKT1	0.344603	2.96263	up (Toledo)
ZCCHC3	-0.339352	2.54226	up (Toledo)
VAMP2	0.139034	1.24118	up (Toledo)
GOSR1	-0.0353013	2.14636	up (Toledo)
PRRC2A	0.409847	2.58278	up (Toledo)
ECI2	-0.231723	2.52697	up (Toledo)
RAB17	2.11927	0	up (OCI-LY19)
ZNF395	1.5793	3.29853	up (both)
GLOD4	-0.0666139	1.38426	up (Toledo)
PSMA3	0.409944	3.32677	up (Toledo)
HIGD1A	-0.14443	2.80137	up (Toledo)
SLC35D1	-0.239099	1.62862	up (Toledo)
C17orf58	-0.359942	1.38357	up (Toledo)
CRKL	0.0857213	1.16241	up (Toledo)
SERPINB9	1.16383	3.44815	up (both)
SSTR2	-0.131661	2.20354	up (Toledo)
GLT8D1	0.106665	2.37973	up (Toledo)
C11orf68	-0.186758	4.86766	up (Toledo)
ARMC1	0.166774	1.62498	up (Toledo)
UBAP1	0.130912	1.18618	up (Toledo)
THUMPD1	-0.4295	3.70362	up (Toledo)
METTL23	0.0314483	3.37613	up (Toledo)
GADD45GIP1	-0.498063	2.39788	up (Toledo)
LSM4	-0.249561	5.05044	up (Toledo)
ZCCHC7	-0.498929	1.26309	up (Toledo)
NDUFA6	-0.836007	3.55462	up (Toledo)
GALK1	-0.365435	2.08515	up (Toledo)
POLR3H	-0.24978	2.24064	up (Toledo)
LEMD2	-0.512312	3.73333	up (Toledo)
FBF1	0.109539	1.47063	up (Toledo)
FCF1	-0.379677	4.12539	up (Toledo)
SKP1	-0.351413	3.37907	up (Toledo)
DERL1	0.278722	1.83436	up (Toledo)
PPP1R8	-0.202852	3.06036	up (Toledo)
OSGEP	0.516811	4.78175	up (Toledo)
TMEM14B	-0.0952982	4.27092	up (Toledo)
MED26	0.246732	1.1833	up (Toledo)
TUBA8	-0.0620244	2.02026	up (Toledo)
SLC25A11	-0.546085	6.01242	up (Toledo)
WDR1	-0.143001	2.60508	up (Toledo)
ZNF746	0.144173	1.5352	up (Toledo)
PIGBOS1	-0.185068	4.12792	up (Toledo)
ENGASE	-0.198597	1.06895	up (Toledo)
CBX8	-0.173343	3.4542	up (Toledo)
POU2F2	-0.312633	1.45562	up (Toledo)
SGSH	0.296482	1.74493	up (Toledo)
ENDOV	-0.18565	1.56599	up (Toledo)
POM121C	-0.194483	1.51851	up (Toledo)
PRR3	0.352812	2.72372	up (Toledo)
SDR39U1	-0.206978	4.96925	up (Toledo)
UBE2B	-0.491	2.89239	up (Toledo)
MRPL19	0.195526	2.98553	up (Toledo)
UQCRFS1	-0.266777	4.17827	up (Toledo)
SNX2	0.0918641	1.43583	up (Toledo)
PHF23	-0.00495757	2.94784	up (Toledo)
HSPA14	0.115935	1.26273	up (Toledo)
PAIP2	0.236393	2.32337	up (Toledo)
PRMT5	-0.287482	3.51481	up (Toledo)
NOP10	-0.456922	2.43292	up (Toledo)
CCM2	-0.120153	1.31108	up (Toledo)
RAC3	0.133557	2.44524	up (Toledo)
SDCBP	0.663576	2.56921	up (Toledo)
RAP2B	0.0453573	1.58778	up (Toledo)
UTS2R	0	2.37131	up (Toledo)
PITRM1	-0.351258	2.91463	up (Toledo)
FN3KRP	-0.538303	1.95312	up (Toledo)
METRNL	2.00483	0	up (OCI-LY19)
ARHGAP27	0	1.7824	up (Toledo)
PLEKHM1	0	1.27786	up (Toledo)
DDX47	-0.0552882	2.61899	up (Toledo)
BTN3A2	0.158493	1.97242	up (Toledo)
DPYSL2	0.524528	1.02169	up (Toledo)
MPST	0.0239513	4.64197	up (Toledo)
GDI1	0.162377	5.18629	up (Toledo)
TGIF1	-0.471298	1.05728	up (Toledo)
TMEM19	-0.0585058	3.32848	up (Toledo)
MRPL55	-0.108803	1.84213	up (Toledo)
ZNFX1	-0.15134	1.05208	up (Toledo)
APCDD1	-0.285477	1.38017	up (Toledo)
POLR3E	0.13662	1.33319	up (Toledo)
ZNF317	0.334146	1.19025	up (Toledo)
NETO2	1.19395	1.23193	up (both)
CEP76	0.173143	1.10692	up (Toledo)
EMC1	0.339612	2.02662	up (Toledo)
DHRS7	0.667245	1.45622	up (Toledo)
GSR	0.43627	2.29634	up (Toledo)
NSMAF	0.338678	1.77264	up (Toledo)
TSPAN31	0.24059	2.62556	up (Toledo)
TRAPPC3	-0.457611	4.17976	up (Toledo)
CABLES1	0.216821	1.67498	up (Toledo)
STAMBP	-0.0341624	2.67209	up (Toledo)
RNF10	-0.201297	3.20418	up (Toledo)
TAF5L	-0.293951	3.81897	up (Toledo)
ZSCAN30	0.140254	1.1026	up (Toledo)
KCTD12	0.191505	2.66451	up (Toledo)
ZNF396	0.0648897	2.12753	up (Toledo)
INO80C	-0.366588	1.4129	up (Toledo)
CISD3	0.204993	3.85405	up (Toledo)
SNX27	0.530875	1.78986	up (Toledo)
YME1L1	-0.0133214	1.88875	up (Toledo)
ST8SIA5	1.01315	-0.491112	up (OCI-LY19)
SEC31A	-0.19399	1.55736	up (Toledo)
SMAD7	0.205803	1.46672	up (Toledo)
ALDH16A1	-0.777528	1.73776	up (Toledo)
NDUFA1	-0.147577	1.25676	up (Toledo)
GADD45A	-0.410052	4.2527	up (Toledo)
SLC25A29	0.0629989	2.96724	up (Toledo)
SKA1	-0.449648	3.04961	up (Toledo)
DUSP6	-0.357941	3.74174	up (Toledo)
TRIM32	0.479224	1.78213	up (Toledo)
ANO8	0.286178	3.43754	up (Toledo)
SNRPA	-0.0884483	1.93192	up (Toledo)
AIDA	-0.518367	1.07557	up (Toledo)
ADD2	1.45993	1.43633	up (both)
MRPL52	-0.454833	5.70769	up (Toledo)
SUCLG1	-0.159561	3.30647	up (Toledo)
AKAP8	-0.188561	1.90675	up (Toledo)
SOCS6	-0.136674	1.2373	up (Toledo)
CYB5A	0	2.7136	up (Toledo)
ADPGK	0.250796	2.18649	up (Toledo)
TMEM43	0.311136	1.29948	up (Toledo)
CUL5	-0.196341	1.46317	up (Toledo)
HSBP1L1	1.22824	0.274737	up (OCI-LY19)
MADCAM1	1.04174	0	up (OCI-LY19)
MED16	-0.0562414	2.12357	up (Toledo)
TAPBPL	-0.0175156	1.78378	up (Toledo)
SBNO2	-0.230292	1.18342	up (Toledo)
NEURL1B	1.68616	0.471728	up (OCI-LY19)
KLHDC2	-0.701699	2.60216	up (Toledo)
ZNF451	0.0862289	1.23226	up (Toledo)
SSNA1	-0.476112	6.82487	up (Toledo)
C19orf25	-0.912943	2.46626	up (Toledo)
MEX3D	0.715626	1.896	up (Toledo)
SLC31A1	-0.246723	1.9249	up (Toledo)
EMP1	1.20302	0	up (OCI-LY19)
SCAMP4	-0.310951	1.07792	up (Toledo)
NDUFA12	-0.480857	1.59819	up (Toledo)
METTL16	-0.157576	1.11951	up (Toledo)
DDHD2	0.726774	1.41376	up (Toledo)
IZUMO4	-0.00634949	2.37813	up (Toledo)
VEZF1	-0.101456	3.91648	up (Toledo)
AMH	-0.31571	3.24526	up (Toledo)
STK17A	0.253012	1.29535	up (Toledo)
TAF1D	0.636784	1.35775	up (Toledo)
RANGRF	-0.313751	2.83664	up (Toledo)
GADD45B	-0.168894	5.97847	up (Toledo)
QKI	-0.254866	1.52349	up (Toledo)
DIRAS1	0.913775	2.82652	up (Toledo)
CLK1	-0.288772	2.17755	up (Toledo)
UNK	0.0341253	1.12083	up (Toledo)
PFDN2	-0.0569931	4.75835	up (Toledo)
DDX19A	-0.36599	3.10848	up (Toledo)
SMIM24	2.75682	2.14923	up (both)
DOHH	-0.0515773	1.34218	up (Toledo)
MFSD12	0.551287	1.20027	up (Toledo)
APBA3	-0.0916982	2.04473	up (Toledo)
EDEM1	0.905912	2.32757	up (Toledo)
CENPH	-0.776803	1.19274	up (Toledo)
TICAM1	0.524893	1.5444	up (Toledo)
MRPL22	-0.430695	1.91074	up (Toledo)
MRPS36	-0.0901297	3.5136	up (Toledo)
BNIP3L	1.29826	-0.332993	up (OCI-LY19)
KDM5B	1.44071	-0.185533	up (OCI-LY19)
MED29	-0.220327	2.37076	up (Toledo)
SRSF8	-0.044955	5.66057	up (Toledo)
SLC25A23	0.022688	2.1401	up (Toledo)
DENND1C	0.147517	3.10216	up (Toledo)
TNFSF9	-0.748816	1.68042	up (Toledo)
CD70	-1.81294	5.26225	up (Toledo)
VTA1	-0.226154	1.46625	up (Toledo)
SH2D3A	1.08801	0	up (OCI-LY19)
MAGEH1	-0.0627739	4.72835	up (Toledo)
PEX11G	0	1.25369	up (Toledo)
ZNF358	0.502264	2.38765	up (Toledo)
JMJD6	0.458297	1.2606	up (Toledo)
STXBP2	0.0864579	1.00273	up (Toledo)
ALKBH5	-0.167105	2.05706	up (Toledo)
SNAPC2	-0.47117	3.78218	up (Toledo)
CTXN1	0.0819153	4.49448	up (Toledo)
HADHB	-0.242383	1.39648	up (Toledo)
GTF2H5	0.0222518	1.43045	up (Toledo)
ADNP2	0.0278408	1.55205	up (Toledo)
DBI	-0.439582	1.12689	up (Toledo)
ZNF426	-0.549667	1.89446	up (Toledo)
IFT20	-0.742165	3.23334	up (Toledo)
BCAT1	-0.0839558	1.18026	up (Toledo)
PPAN	0	3.84394	up (Toledo)
NFX1	-0.00181403	1.35579	up (Toledo)
KLHL28	0.565895	1.1785	up (Toledo)
S1PR2	-0.0117794	3.0051	up (Toledo)
ICAM5	0.345991	1.50367	up (Toledo)
EBPL	0.285502	1.65978	up (Toledo)
ALDH5A1	0.0964665	1.60213	up (Toledo)
FBXL6	-0.156509	4.57169	up (Toledo)
MAP2K2	-0.176572	2.50565	up (Toledo)
DAAM1	-0.113339	1.09044	up (Toledo)
CNTROB	0.404096	1.56659	up (Toledo)
USP14	-0.24535	1.56308	up (Toledo)
OCIAD1	0.102906	2.46685	up (Toledo)
TMED1	0.345248	1.1704	up (Toledo)
FXN	-0.170872	1.69342	up (Toledo)
RAB1A	-0.132755	2.42084	up (Toledo)
SPC24	0.6978	3.81821	up (Toledo)
GTF2B	-0.229638	1.34638	up (Toledo)
SWSAP1	-0.773724	3.42881	up (Toledo)
EPOR	0.131308	1.67294	up (Toledo)
ZDHHC12	0.406349	4.26214	up (Toledo)
ACP5	0	1.38238	up (Toledo)
ZNF440	0.54803	1.16219	up (Toledo)
NFE2L1	-0.256725	3.42635	up (Toledo)
HTRA2	0.228705	4.82113	up (Toledo)
ZNF791	0.231985	1.2621	up (Toledo)
BCOR	-0.00422419	1.33499	up (Toledo)
COA4	-0.219651	3.24797	up (Toledo)
GTF3C3	-0.0688269	1.6803	up (Toledo)
LEPROTL1	-0.107972	1.18578	up (Toledo)
PEX19	-0.132995	2.35051	up (Toledo)
MAST1	0.317863	1.65377	up (Toledo)
RCN1	0.554725	3.35103	up (Toledo)
TERF2	-0.37297	1.79361	up (Toledo)
DCAF15	-0.0120158	2.05017	up (Toledo)
GSPT1	-0.353133	2.08715	up (Toledo)
IL27RA	1.08598	0	up (OCI-LY19)
SAMD1	-1.33199	2.29795	up (Toledo)
SF3B4	-0.185511	2.02244	up (Toledo)
TOX4	-0.0571822	3.46575	up (Toledo)
AP4B1	0.0382836	1.79719	up (Toledo)
GIPC1	-0.388027	1.15032	up (Toledo)
RUVBL2	-0.375422	2.92826	up (Toledo)
FASTKD3	0.142889	2.2389	up (Toledo)
WWP1	0.474642	1.02916	up (Toledo)
IFNAR1	-0.380242	2.98558	up (Toledo)
HEATR1	-0.0152592	1.68991	up (Toledo)
SLC25A35	-0.242553	2.03974	up (Toledo)
MARK2	-0.606769	1.0866	up (Toledo)
JTB	-0.399884	2.84349	up (Toledo)
CD53	-0.19089	1.23579	up (Toledo)
TMEM38A	0.170145	1.20261	up (Toledo)
CTSB	0.213534	2.31575	up (Toledo)
TNIP1	0.0684471	1.51617	up (Toledo)
OCEL1	0.335485	3.80632	up (Toledo)
FGFR1OP2	0.191301	1.89905	up (Toledo)
PPP1R7	-0.303187	1.96473	up (Toledo)
ISL2	-0.522601	2.32653	up (Toledo)
CAPZA1	-0.470142	2.38473	up (Toledo)
CCDC124	-0.68152	1.29712	up (Toledo)
VAMP1	0.078471	1.89271	up (Toledo)
PIK3R2	0.105445	1.25893	up (Toledo)
MPV17L2	0.459414	3.0677	up (Toledo)
B4GAT1	-0.210724	5.00139	up (Toledo)
PNRC2	-0.0900312	5.08193	up (Toledo)
CYCS	-0.265581	2.33258	up (Toledo)
FKBP8	0.489037	2.59671	up (Toledo)
OPA1	-0.190928	1.27074	up (Toledo)
ERAP2	-0.153033	1.3872	up (Toledo)
TARBP1	0.221915	1.78208	up (Toledo)
DPH2	-0.27072	4.44857	up (Toledo)
ALDH6A1	0.314184	1.87743	up (Toledo)
P4HA1	1.50998	-1.12225	up (OCI-LY19)
YJEFN3	-0.151796	1.86447	up (Toledo)
PBX4	-0.255698	1.90228	up (Toledo)
LPAR2	0.467786	2.25872	up (Toledo)
ZNF14	-0.389559	1.06207	up (Toledo)
ZNF253	0.0444008	1.06601	up (Toledo)
ULK1	-0.548838	2.48646	up (Toledo)
ELP5	-0.222908	3.28244	up (Toledo)
ZNF431	0.153958	1.17036	up (Toledo)
PGS1	-0.280993	1.82588	up (Toledo)
ETS1	-0.521266	1.65547	up (Toledo)
ACOT13	0.252181	1.06527	up (Toledo)
FAM76B	-0.36909	3.15783	up (Toledo)
ACO2	-0.355027	2.89326	up (Toledo)
ZNF681	-0.375504	1.47356	up (Toledo)
TXNDC17	-0.35765	1.26712	up (Toledo)
REL	0.0911272	1.2695	up (Toledo)
BAHD1	-0.231592	2.28102	up (Toledo)
YIPF6	0.611476	2.55374	up (Toledo)
KCTD15	-0.364126	1.25856	up (Toledo)
CALML4	-0.0432139	1.68523	up (Toledo)
TMA7	-0.206589	7.09294	up (Toledo)
E2F3	0.255913	1.70427	up (Toledo)
ZNF181	0.0356414	1.26122	up (Toledo)
NOL6	0.0484095	1.46877	up (Toledo)
C11orf54	-0.0595307	2.51095	up (Toledo)
SLC35B2	0.123196	4.58688	up (Toledo)
ILKAP	-0.352099	2.81197	up (Toledo)
TIMM9	0.219678	3.25318	up (Toledo)
ETV2	-0.649237	2.79543	up (Toledo)
ZDHHC8	-0.193395	1.34866	up (Toledo)
IGFLR1	-1.39884	1.1265	up (Toledo)
U2AF1L4	-0.0657538	3.5088	up (Toledo)
TTLL12	0.16413	2.02028	up (Toledo)
APLP1	-0.15637	1.77679	up (Toledo)
BCAS2	-0.290242	1.72478	up (Toledo)
[truncated: 2,065 more rows]

## Sheet: Table S4.
Supplementary Table 4. Differentially expressed gene between sCNSi+ and sCNSi− patient samples
Symbol	logFC	AveExpr	t	P.Value	Category
TMEM165	-1.38565	1.9174	-4.06336	0.000275984	Down
FOXC1	2.8554	1.95333	3.75136	0.000667891	Up
KIF22	1.84803	3.60037	3.46444	0.00147663	Up
NRGN	2.01074	2.71364	3.36629	0.00192727	Up
ZNF211	-2.03543	3.97021	-3.34592	0.00203609	Down
OLFML1	-1.03412	0.72622	-3.28888	0.00237306	Down
DDX49	-2.03116	4.6265	-3.28603	0.00239121	Down
LL22NC01-81G9.3	0.646532	0.509282	3.28141	0.00242096	Up
ZNF132	-0.918961	0.420096	-3.11901	0.00372129	Down
TMEM106B	1.35137	2.38423	3.10683	0.00384186	Up
NLRC5	-1.00462	2.09902	-3.09947	0.00391658	Down
FKBP11	1.57811	2.73473	3.09669	0.00394508	Up
FGF23	0.875723	0.533176	3.09248	0.00398872	Up
MAP2K3	0.984421	4.01329	3.08406	0.00407729	Up
RRP1B	1.41751	3.34348	3.05297	0.0044209	Up
NOL4L	-0.847157	1.29193	-3.03512	0.00463041	Down
PELI2	0.613497	0.514567	3.008	0.00496672	Up
THBS3	-0.997089	0.726044	-3.00071	0.0050611	Down
FTL	-0.872818	11.4142	-2.99144	0.00518334	Down
LIPA	-1.44635	3.16069	-2.96454	0.00555425	Down
LMAN2L	-1.47098	1.84251	-2.93839	0.00593885	Down
PTGR2	-0.762642	0.536617	-2.92059	0.0062147	Down
SSR4	-0.985107	7.36901	-2.91151	0.00635998	Down
ABI2	0.707468	1.23599	2.89029	0.00671223	Up
AGA	-1.592	2.00677	-2.86425	0.0071695	Down
GEMIN4	1.52938	4.15669	2.81034	0.00821061	Up
TRIM60	-0.0578726	0.026456	-2.8051	0.00831885	NS
CEP152	1.04468	1.96662	2.80319	0.00835884	Up
GBP1	-1.48217	5.66019	-2.80295	0.00836378	Down
PLA2G4A	-0.11523	0.0593655	-2.7962	0.00850603	NS
KLHL14	0.855038	0.937486	2.78741	0.00869488	Up
PLXDC2	-0.477499	1.25477	-2.78187	0.00881574	NS
SLC25A46	1.20239	4.59191	2.77876	0.00888426	Up
CHI3L1	-2.43403	2.70319	-2.77273	0.00901865	Down
HACD4	0.621062	0.379191	2.76911	0.00910029	Up
SSX2IP	0.921167	1.06165	2.76625	0.00916534	Up
SF3A1	-1.10766	3.48291	-2.75188	0.00949824	Down
TEAD2	0.906539	8.57104	2.74941	0.00955659	Up
FOXJ2	1.20827	1.82819	2.74399	0.00968578	Up
ALDH3A2	-1.14954	1.46174	-2.74357	0.00969581	Down
PFDN1	0.698136	0.698298	2.74159	0.00974355	Up
BTLA	0.968563	0.912583	2.73125	0.00999576	Up
GPR153	-1.03585	0.634016	-2.73053	0.0100137	Down
SMARCAL1	0.643281	0.598982	2.7252	0.0101463	Up
HLA-DPB1	-0.991733	6.57969	-2.71775	0.0103345	Down
SNAPC1	0.941824	0.982124	2.71517	0.0104005	Up
SNORD28	3.40924	2.585	2.70256	0.0107285	Up
PNPO	-1.77828	3.03494	-2.6961	0.0109002	Down
EMILIN1	-2.10761	2.78852	-2.69371	0.0109644	Down
DUSP1	2.01502	1.75096	2.69311	0.0109804	Up
RAMP3	-1.08551	1.2613	-2.68372	0.0112362	Down
ARL5A	1.30912	2.85622	2.67548	0.0114654	Up
ESPL1	0.734664	0.481408	2.67373	0.0115146	Up
TNFSF8	0.910434	0.995528	2.6706	0.0116031	Up
NIN	-0.886393	2.66355	-2.659	0.0119365	Down
DLG5-AS1	0.559273	0.627382	2.65877	0.0119433	Up
JOSD1	1.2881	4.52682	2.65726	0.0119873	Up
SHTN1	-0.535598	0.738133	-2.65593	0.0120263	Down
NCDN	1.39296	4.15385	2.64535	0.0123403	Up
BAG2	1.44078	1.82033	2.63445	0.0126717	Up
LOC100129138	0.469362	0.284129	2.63256	0.0127301	NS
FZD3	0.794084	1.05693	2.62567	0.0129446	Up
TPPP3	1.46776	0.958113	2.62261	0.013041	Up
TCL1A	2.48893	4.31516	2.62188	0.013064	Up
CFP	-1.45065	1.89508	-2.60413	0.0136376	Down
CISD1	1.03639	3.05852	2.60062	0.0137535	Up
ZFP69	1.03799	0.783756	2.59473	0.0139504	Up
RNU11	3.65376	4.88457	2.58876	0.0141527	Up
IL2RG	-0.792377	7.57772	-2.58799	0.0141789	Down
INO80B	-2.34719	4.1217	-2.5865	0.0142298	Down
MOGS	-1.54477	6.02191	-2.58193	0.0143872	Down
PRSS16	0.90423	0.490868	2.57601	0.0145935	Up
FCRLA	2.11906	3.53094	2.57488	0.014633	Up
KIN	-0.715671	1.44743	-2.5578	0.015245	Down
SMCHD1	-0.693271	2.51157	-2.55325	0.0154121	Down
PHTF1	-1.03617	1.49095	-2.54982	0.0155392	Down
ZNF394	0.982064	0.976871	2.544	0.0157565	Up
UBP1	1.14206	2.15373	2.54308	0.0157915	Up
DTWD1	0.641683	0.553611	2.53088	0.0162574	Up
DNMBP	0.434093	0.471973	2.52779	0.0163777	NS
LINC00665	0.663001	0.624677	2.52292	0.0165686	Up
CSF2RB	-0.981874	1.04904	-2.51915	0.0167178	Down
ULK2	0.132184	0.0831508	2.51832	0.0167507	NS
LTC4S	-1.00323	0.54273	-2.50603	0.0172464	Down
TBC1D25	1.26187	2.02649	2.49439	0.0177284	Up
MND1	0.496352	0.506896	2.49381	0.017753	NS
XAB2	-1.07817	1.10743	-2.48653	0.0180612	Down
NOP16	1.92751	2.89339	2.4744	0.0185853	Up
ARIH2	0.951086	2.84897	2.46735	0.0188962	Up
DBET	0.23572	0.175323	2.46624	0.0189454	NS
CD37	0.708524	10.1236	2.46143	0.0191612	Up
AP3S1	0.766387	1.98929	2.45866	0.019286	Up
LOC101927919	0.706027	0.383272	2.45858	0.0192899	Up
SSNA1	-2.43158	3.98779	-2.45845	0.0192954	Down
PKDCC	-0.82463	0.455263	-2.45661	0.019379	Down
RENBP	-0.508065	0.313791	-2.454	0.0194982	Down
MKRN2OS	0.221367	0.141543	2.4539	0.0195028	NS
NUCB1	-1.2908	4.52127	-2.45008	0.0196781	Down
SIK1	-0.736602	0.454728	-2.44863	0.0197453	Down
CLCN6	0.619506	0.366001	2.44725	0.0198093	Up
ZBTB33	1.78721	3.46975	2.44606	0.0198643	Up
PPIL2	-1.36031	3.63919	-2.43627	0.0203246	Down
IGF2BP3	0.671996	1.18784	2.4333	0.0204664	Up
RSC1A1	1.35345	0.912834	2.43282	0.0204892	Up
KIAA0040	1.04088	3.45669	2.43069	0.0205916	Up
HNF4A-AS1	0.0792703	0.0456064	2.43064	0.0205938	NS
ACHE	-1.63527	1.93856	-2.42433	0.0208992	Down
CEBPA	-2.15751	2.37283	-2.4202	0.0211015	Down
ERP29	1.13713	5.67054	2.41864	0.0211783	Up
BLOC1S1	2.13762	3.79978	2.4098	0.0216185	Up
TECPR1	-0.936495	3.2748	-2.40228	0.0219991	Down
PARP6	-0.922082	1.30649	-2.40167	0.0220305	Down
SACM1L	-0.674933	3.47055	-2.4009	0.0220697	Down
ANXA4	-0.334456	0.281133	-2.39964	0.0221347	NS
NXT2	1.64004	2.24527	2.39813	0.0222121	Up
GNL2	-1.08746	3.05014	-2.39443	0.0224033	Down
HMGB3	1.37137	1.99943	2.39439	0.0224056	Up
LIME1	-1.7559	5.44906	-2.38932	0.0226703	Down
PELI1	0.934949	3.59922	2.38618	0.0228353	Up
MMP21	-0.858807	0.392597	-2.38551	0.0228707	Down
CYP4F35P	1.3268	2.09416	2.3821	0.023052	Up
PMAIP1	2.4025	3.88584	2.37737	0.0233053	Up
TFDP1	0.94291	1.84622	2.3713	0.0236336	Up
PRKD2	-0.673749	3.1236	-2.36166	0.0241648	Down
LOC644285	-0.668126	0.326883	-2.35464	0.0245578	Down
MTMR9LP	-0.788899	0.481463	-2.3466	0.0250154	Down
CD163L1	-0.152243	0.0879012	-2.34644	0.0250245	NS
CPM	-0.636175	0.907456	-2.34218	0.0252699	Down
FAM74A3	0.103287	0.0560698	2.33842	0.0254886	NS
TIFAB	-0.597455	0.273122	-2.3333	0.0257885	Down
ALPK1	-0.344189	0.310349	-2.33218	0.0258547	NS
RIMS2	0.0583501	0.0316757	2.32885	0.0260527	NS
DND1	1.96513	2.83377	2.32735	0.0261416	Up
SLCO4A1	-0.621023	0.501068	-2.32241	0.0264384	Down
SNORD92	2.44169	1.32549	2.32182	0.0264736	Up
ZNF2	-0.468516	0.406051	-2.31911	0.0266381	NS
NT5C	1.98662	5.89683	2.31858	0.0266702	Up
IL32	-0.737312	8.64184	-2.31629	0.02681	Down
PAAF1	-0.438655	0.389802	-2.31461	0.0269123	NS
HSPA7	-1.63451	5.02619	-2.31378	0.0269635	Down
RNF183	1.63681	1.73537	2.30926	0.0272424	Up
ADCY5	-0.124954	0.074823	-2.30814	0.0273114	NS
TMEM177	0.524097	0.469209	2.30745	0.0273546	Up
KIFC1	1.34276	2.4386	2.30686	0.0273915	Up
IFITM10	-0.687492	0.470329	-2.30396	0.0275725	Down
INO80B-WBP1	-1.99119	3.03579	-2.30284	0.0276429	Down
TRIP4	-0.731781	1.06533	-2.3026	0.0276577	Down
LOC103021295	3.01285	5.16773	2.29878	0.0278987	Up
USP16	-0.934267	3.21108	-2.29411	0.0281959	Down
SLC16A1-AS1	1.01823	1.05506	2.28921	0.0285103	Up
SSH2	-0.474644	1.20581	-2.2892	0.0285109	NS
EIF4EBP2	0.83305	4.58752	2.28765	0.0286114	Up
DRD5P2	0.83087	0.451044	2.28447	0.028818	Up
LOC101060524	0.83087	0.451044	2.28447	0.028818	Up
ARSI	0.732815	0.427862	2.28428	0.02883	Up
LEF1	0.605356	0.699799	2.28404	0.0288459	Up
THG1L	-1.38561	1.49703	-2.27927	0.0291588	Down
FLT3LG	-1.43394	5.21816	-2.27725	0.029292	Down
ZNRF3-AS1	0.614151	0.549666	2.27484	0.0294519	Up
PCMT1	0.745262	0.979438	2.27455	0.0294711	Up
ISG20	-0.825714	4.61784	-2.27329	0.0295552	Down
GPHN	-0.0442	0.0315435	-2.2727	0.0295942	NS
ERV3-1	1.22135	1.08059	2.26961	0.0298014	Up
LPAR4	0.659205	0.357854	2.26694	0.0299814	Up
ITIH3	-0.642593	0.355771	-2.26341	0.0302201	Down
IL12RB2	0.60317	0.803001	2.26153	0.0303486	Up
AP2S1	1.31594	3.11604	2.25947	0.0304894	Up
BCL11A	1.09546	3.05664	2.25599	0.0307288	Up
MMP16	0.0696092	0.0416639	2.25132	0.031053	NS
SLC4A2	-0.762458	1.11465	-2.24985	0.0311557	Down
LOC145474	1.74239	2.22558	2.24678	0.0313709	Up
STAC2	0.068782	0.0579136	2.24192	0.0317147	NS
CRYAB	0.862198	0.618372	2.24141	0.0317511	Up
KLRG1	-0.236849	0.273452	-2.24115	0.0317689	NS
RAP2C-AS1	-0.130905	0.0991234	-2.2399	0.0318585	NS
PBXIP1	-1.08607	3.88663	-2.2341	0.0322747	Down
WDR55	1.50361	2.33874	2.22865	0.0326698	Up
RUFY2	0.847422	2.51661	2.22575	0.0328822	Up
NOL4	0.230187	0.127143	2.22371	0.0330317	NS
CHERP	1.2087	2.39189	2.22365	0.0330361	Up
ZNF20	-0.401338	0.197304	-2.22179	0.0331735	NS
RARRES1	-0.819502	1.20123	-2.21965	0.033332	Down
PIGW	1.3135	1.46125	2.2194	0.0333512	Up
EMID1	-0.314747	0.153358	-2.21839	0.0334257	NS
TGFB2-AS1	1.46188	0.793592	2.21305	0.0338259	Up
IRF2	0.622699	1.23796	2.20868	0.0341561	Up
TRAPPC8	0.678539	1.39921	2.20812	0.0341985	Up
MESTIT1	0.555323	0.439389	2.20739	0.0342543	Up
ALG11	1.03219	4.23036	2.2059	0.0343676	Up
SPPL3	0.566652	1.41582	2.20451	0.0344739	Up
SDSL	-0.609276	0.601987	-2.20411	0.0345046	Down
SOX4	1.73609	5.10388	2.20354	0.0345485	Up
RAPGEF5	0.184044	0.1831	2.20309	0.0345824	NS
IGSF3	0.339871	0.241761	2.19951	0.0348588	NS
RAET1E	0.950118	0.659101	2.1994	0.0348673	Up
COL19A1	0.0833979	0.0560668	2.1978	0.0349912	NS
STK24	-0.736276	2.02674	-2.19538	0.0351789	Down
PLXNC1	-0.668536	1.15975	-2.19265	0.0353924	Down
MIS18A	0.511667	0.700533	2.19249	0.0354048	Up
ZDHHC3	0.807371	2.26768	2.19234	0.0354168	Up
LMO2	-0.561062	0.43764	-2.19206	0.0354387	Down
FHL3	0.854539	0.627111	2.19107	0.0355168	Up
ATRN	-0.215325	0.192508	-2.1901	0.0355924	NS
URM1	1.11412	2.04004	2.18829	0.0357358	Up
CXCL13	-0.947206	1.44205	-2.18779	0.0357748	Down
ITIH5	-0.372503	0.358121	-2.18616	0.035904	NS
PTMS	-1.70756	3.84412	-2.18346	0.0361193	Down
STX10	1.62338	4.12597	2.18183	0.0362497	Up
IFNG	-0.921494	0.502594	-2.18097	0.036318	Down
GABRB2	0.250047	0.160422	2.18006	0.0363916	NS
ERBB4	0.0248908	0.013715	2.17983	0.0364101	NS
MS4A6A	-0.979508	3.89815	-2.17754	0.0365941	Down
SLC8A1-AS1	-0.093418	0.0756379	-2.17678	0.0366556	NS
ANXA6	-0.732481	3.4505	-2.17387	0.036892	Down
DNAH11	0.208288	0.196688	2.17348	0.036923	NS
ZIC5	0.631332	0.357514	2.16752	0.0374108	Up
HRH4	0.433371	0.320029	2.16704	0.0374511	NS
GALNT12	0.718069	0.760009	2.16702	0.0374523	Up
INTS6-AS1	1.48638	1.17461	2.16578	0.0375543	Up
NPR2	-0.71424	0.49593	-2.16222	0.0378498	Down
USP13	0.540306	0.752993	2.15858	0.038154	Up
SMARCC1	0.534187	2.73944	2.15807	0.0381964	Up
MAD2L1BP	1.29588	4.15308	2.15751	0.0382436	Up
SYT17	0.43395	0.439308	2.15727	0.0382635	NS
STARD4-AS1	0.11149	0.0850271	2.15534	0.0384263	NS
RIN1	0.761071	0.413153	2.15502	0.0384525	Up
EBP	1.58419	2.10933	2.15434	0.03851	Up
PAX1	0.957667	0.519877	2.15155	0.0387464	Up
DUXAP10	0.32791	0.222801	2.14928	0.03894	NS
C2CD4A	-0.557111	0.280747	-2.14344	0.0394411	Down
RAB37	-0.446171	0.450112	-2.14069	0.039679	NS
ZNF625-ZNF20	-0.293201	0.152711	-2.14019	0.0397221	NS
CYB561D2	0.903032	3.28956	2.139	0.0398254	Up
PTGDR	0.543863	0.30578	2.13796	0.039916	Up
ANAPC1P1	0.0896158	0.0713771	2.13777	0.039933	NS
LINC01087	0.377246	0.220502	2.13476	0.0401962	NS
LARP7	-0.651759	4.78619	-2.1339	0.0402718	Down
ABCC9	0.192836	0.137983	2.13218	0.0404227	NS
ARFGAP1	-1.0761	1.57849	-2.13065	0.0405584	Down
TSSC2	0.320283	0.183059	2.12993	0.0406218	NS
AAAS	-0.933511	4.84489	-2.1277	0.0408202	Down
ACVRL1	-1.10945	1.62797	-2.12419	0.0411335	Down
NUDT3	0.401294	0.551261	2.12326	0.0412166	NS
ADORA2A-AS1	-0.265377	0.123574	-2.12298	0.0412415	NS
LINC00885	0.641454	0.348218	2.12143	0.0413814	Up
CTIF	-0.101856	0.0669754	-2.12072	0.041445	NS
LRIG1	0.352699	0.400275	2.11993	0.0415167	NS
NCKAP5	-0.0358095	0.0229798	-2.11857	0.0416394	NS
CLCF1	-0.754544	0.598893	-2.11665	0.0418138	Down
SNAP91	-0.181522	0.0845436	-2.11614	0.0418599	NS
UBE2G1	0.601704	1.88575	2.11528	0.0419379	Up
SMIM12	1.30031	4.01854	2.11458	0.0420017	Up
SCARNA7	2.18517	1.835	2.11454	0.0420059	Up
LINC01209	1.08321	0.731562	2.11416	0.0420406	Up
ATP13A4	0.0740362	0.0442809	2.11399	0.0420558	NS
LTB	-0.780437	8.91217	-2.11285	0.0421596	Down
ARL4D	-1.6053	1.22933	-2.11114	0.0423164	Down
ABCB6	-0.953205	0.93774	-2.1087	0.0425412	Down
UBQLN2	1.73602	2.98166	2.1032	0.0430516	Up
AFF3	0.274507	0.376063	2.1013	0.0432287	NS
P2RX7	-0.743739	2.06543	-2.10006	0.0433455	Down
SERPINE1	-1.24258	1.70237	-2.0964	0.0436897	Down
RAB40A	-0.132584	0.0606096	-2.0944	0.043879	NS
TMEM80	-1.04164	1.29601	-2.09413	0.0439048	Down
ETV4	-0.402072	0.243533	-2.09262	0.0440483	NS
DNAJC5B	-0.210361	0.139256	-2.09074	0.0442273	NS
RABAC1	1.81046	4.82583	2.09072	0.0442291	Up
ABLIM2	-0.0476984	0.021805	-2.0906	0.0442407	NS
VAMP3	-1.47984	2.3514	-2.0905	0.0442506	Down
DNAJB13	0.270965	0.197093	2.08913	0.0443812	NS
IDH3G	-1.01845	4.8175	-2.08911	0.0443836	Down
NNT	0.498746	0.848172	2.08773	0.0445155	NS
PIGP	-1.18832	1.44992	-2.08662	0.0446223	Down
HPR	-0.815885	0.454422	-2.08561	0.0447192	Down
MED19	1.37789	3.16158	2.08552	0.0447284	Up
FAM90A1	-0.776368	0.417459	-2.08547	0.0447332	Down
MCM2	1.25677	4.15373	2.08522	0.044757	Up
CCDC152	-0.804823	2.17581	-2.08393	0.044882	Down
ENOX2	0.526771	0.974491	2.08365	0.0449083	Up
KLK1	-1.17046	0.851798	-2.08333	0.0449399	Down
TFEC	-0.305081	0.252749	-2.08201	0.0450676	NS
MYL10	0.0271031	0.016819	2.08021	0.045243	NS
ZNF165	-0.631305	0.42754	-2.07874	0.0453864	Down
ARMC7	1.00905	3.15892	2.07766	0.0454913	Up
PTGDS	-1.83319	6.36676	-2.07448	0.045804	Down
SERPINB8	0.541288	0.600667	2.0741	0.045841	Up
RAP2C	1.08038	2.27457	2.07183	0.0460659	Up
CSNK1G1	-0.566597	1.7198	-2.07132	0.0461162	Down
TAGLN	-1.67611	5.43407	-2.07123	0.0461249	Down
ELL3	1.8675	3.29067	2.07104	0.0461438	Up
KNTC1	0.461528	0.799449	2.07038	0.0462093	NS
LINC00938	1.72632	6.26348	2.07035	0.0462122	Up
CPXM1	1.25672	1.20709	2.07009	0.0462382	Up
RACGAP1	0.43652	0.541824	2.06846	0.0464001	NS
RASSF4	-0.926257	4.28898	-2.06671	0.0465745	Down
CPEB3	-0.222102	0.239421	-2.06651	0.0465952	NS
TANGO2	-0.819783	3.03643	-2.0654	0.0467063	Down
FGD5-AS1	-0.949153	6.29136	-2.06518	0.0467279	Down
LMO3	0.314077	0.170499	2.0646	0.0467859	NS
WDFY4	0.60542	1.20773	2.06375	0.0468719	Up
TTLL5	-0.174141	0.202867	-2.06358	0.0468884	NS
TATDN2	0.795212	3.39153	2.06309	0.0469377	Up
HLA-H	-0.718572	6.89973	-2.06016	0.0472334	Down
RPS10-NUDT3	0.32075	0.458872	2.06007	0.0472427	NS
CCL19	-2.46402	4.54808	-2.06005	0.0472451	Down
FMO2	-0.895172	1.15587	-2.05989	0.0472611	Down
HS3ST3A1	-0.365195	0.394944	-2.05968	0.0472819	NS
TNFRSF9	-1.06264	1.76682	-2.05926	0.0473244	Down
PLGLB2	0.913977	1.09359	2.05596	0.0476603	Up
HOXA5	-1.58579	1.44515	-2.05421	0.0478384	Down
GNS	-0.760878	3.67613	-2.05414	0.0478464	Down
TATDN1	-0.877669	2.54995	-2.05276	0.0479871	Down
RBM14	1.35289	3.23089	2.05274	0.0479891	Up
LOC102724719	0.453044	0.245938	2.05103	0.0481656	NS
EMX2OS	0.127246	0.148967	2.05063	0.0482061	NS
PRPF38A	1.0748	2.97289	2.05	0.0482712	Up
CRYL1	-0.281411	0.269764	-2.04798	0.0484796	NS
FDCSP	-1.69281	2.37336	-2.04694	0.0485879	Down
HOXB-AS3	-0.469126	0.214457	-2.04531	0.0487573	NS
GAB1	0.423482	0.641591	2.04514	0.0487746	NS
ATXN7	-0.460156	2.75589	-2.04235	0.0490664	NS
CARD8-AS1	-1.73382	2.7937	-2.04174	0.0491303	Down
LILRB3	1.58955	3.84999	2.04125	0.0491815	Up
ACADS	-1.05427	1.23185	-2.04118	0.049189	Down
HP	-1.01297	0.595265	-2.04019	0.0492919	Down
PLRG1	-1.06419	2.09654	-2.03984	0.0493295	Down
CLDN20	-0.346764	0.158521	-2.03849	0.0494717	NS
DCANP1	-0.656714	0.300212	-2.03454	0.0498894	Down
CITED2	1.15634	7.38218	2.03429	0.0499157	Up
B3GNT2	0.695442	4.48424	2.0335	0.0499993	Up
SYCE2	-0.297008	0.140055	-2.03302	0.0500502	NS
HADHA	-0.533584	3.83529	-2.03246	0.0501106	NS
FGF1	-0.0928372	0.0424399	-2.0319	0.0501701	NS
CA11	-0.944534	0.739608	-2.02969	0.0504057	NS
OSBPL3	-0.573542	1.25326	-2.02967	0.0504084	NS
SNORA81	-0.495714	13.9863	-2.02801	0.0505866	NS
FAM9B	0.154651	0.10244	2.02777	0.0506121	NS
MALSU1	-0.916008	0.876514	-2.02764	0.0506265	NS
ZC3H8	0.692839	1.03926	2.02598	0.0508052	NS
MEX3B	-0.517593	0.236614	-2.02592	0.0508109	NS
SPATA12	-0.308703	0.141122	-2.0253	0.0508781	NS
ADAM12	-0.165309	0.181098	-2.02492	0.0509195	NS
SEMA3E	0.114524	0.0869043	2.02396	0.0510228	NS
ALDH1A1	-0.780417	1.10659	-2.0233	0.0510946	NS
MSN	-0.395256	3.61106	-2.02242	0.0511897	NS
LOC100289511	0.457546	0.497562	2.02241	0.0511913	NS
ACVR2B-AS1	0.609692	0.512747	2.0215	0.0512902	NS
KCNH8	-0.0459147	0.0211832	-2.02113	0.0513307	NS
HPS3	0.84847	1.64	2.02095	0.0513501	NS
OTUD4	-0.823945	2.11998	-2.01926	0.0515341	NS
HLA-DQB2	-0.512316	0.243679	-2.01713	0.0517672	NS
PROC	-0.33995	0.155406	-2.01682	0.0518008	NS
RGPD5	-0.310559	0.362915	-2.01518	0.051982	NS
SVIL-AS1	0.443095	0.39376	2.0145	0.0520568	NS
FOXE1	0.607456	0.329762	2.01245	0.0522831	NS
LINC01606	-0.0708143	0.0323722	-2.01225	0.0523048	NS
L1CAM	0.514511	0.428237	2.01129	0.0524115	NS
BACH2	0.443466	1.0319	2.01033	0.0525177	NS
HCAR1	0.215065	0.140261	2.00918	0.0526458	NS
NARS2	0.308996	0.35532	2.00676	0.0529149	NS
P2RY12	-0.187186	0.0855708	-2.00435	0.0531849	NS
AANAT	0.0423259	0.0350268	2.00388	0.053238	NS
BCYRN1	-1.44477	6.13994	-2.00279	0.0533601	NS
SMIM13	0.693149	0.760888	2.00274	0.0533662	NS
RASGRP4	-0.867726	4.94616	-2.00141	0.0535165	NS
SCARNA3	-2.5547	3.82992	-2.00093	0.0535701	NS
TMEM184B	0.653449	0.807228	2.00047	0.0536226	NS
DHDH	-0.489176	0.223623	-2.00047	0.0536228	NS
CELF1	0.411674	3.92175	1.99868	0.0538251	NS
ENPP1	0.251711	0.182993	1.99724	0.0539887	NS
HSPA6	-1.50831	4.78203	-1.9959	0.0541416	NS
CYP2B7P	0.0546562	0.0499244	1.99491	0.0542539	NS
ELF1	-0.516169	2.29076	-1.99483	0.0542637	NS
CCDC136	-0.552034	0.403793	-1.99368	0.054395	NS
ATP6V1E1	-0.778306	3.0603	-1.99289	0.0544855	NS
PPM1D	-0.414735	0.337049	-1.99125	0.0546743	NS
POTEJ	-0.145148	0.110321	-1.99112	0.0546889	NS
BEND3	0.543025	0.433115	1.9909	0.0547137	NS
ANKHD1	-0.255111	0.200693	-1.98975	0.054846	NS
SUGP1	0.524597	0.697424	1.98835	0.0550084	NS
CD164	-1.32448	2.34643	-1.98717	0.0551446	NS
C7orf31	0.366868	0.289723	1.98687	0.0551798	NS
HEXA-AS1	-0.451827	0.20655	-1.98273	0.0556614	NS
LAT2	-0.98937	4.22284	-1.98222	0.0557214	NS
PARGP1	0.0485528	0.0263572	1.98202	0.0557448	NS
ZNF610	0.348871	0.192107	1.98188	0.0557611	NS
HCFC2	-0.516419	0.548313	-1.98136	0.0558218	NS
GSTM4	-0.79258	0.799186	-1.98112	0.0558492	NS
OGDH	0.744179	1.63482	1.98022	0.0559549	NS
DHRS11	-0.821168	0.621069	-1.97934	0.0560579	NS
ADAMTS15	0.286426	0.155488	1.97902	0.0560958	NS
CD3D	-0.784175	6.84426	-1.97886	0.0561145	NS
C3orf80	-0.853289	0.390075	-1.97749	0.0562767	NS
PPP2R5C	-0.469844	2.13757	-1.97587	0.0564676	NS
CTU1	1.0896	1.50377	1.97518	0.0565492	NS
TIGD6	-0.46053	0.210528	-1.97472	0.0566035	NS
HPGDS	-0.214059	0.136626	-1.97462	0.0566151	NS
PSMG3-AS1	-0.466198	0.309569	-1.9724	0.0568792	NS
HES2	0.515877	0.558091	1.97215	0.0569089	NS
SLC39A10	0.431573	0.622094	1.9716	0.0569749	NS
CYS1	-0.286439	0.130943	-1.97159	0.0569757	NS
SNCA	-0.106844	0.0563032	-1.96947	0.057229	NS
GTF3C5	0.818863	1.26327	1.96821	0.0573799	NS
ZNF264	0.780578	1.46106	1.96781	0.0574278	NS
ADAMTS13	-0.166309	0.0760272	-1.96693	0.0575339	NS
RNU4ATAC	0.341665	18.3264	1.96685	0.0575438	NS
FUNDC1	0.986944	1.28629	1.96649	0.0575865	NS
BRS3	0.42614	0.231333	1.96647	0.0575885	NS
LPP	-0.271027	0.809047	-1.96499	0.0577675	NS
PSD4	-0.689686	4.2827	-1.96448	0.0578285	NS
TLR8	-0.799379	0.742592	-1.9641	0.0578748	NS
LOC100288069	0.141902	0.128777	1.96221	0.0581039	NS
DCD	0.752644	0.408578	1.9621	0.0581172	NS
NFYC-AS1	1.34115	2.07516	1.962	0.0581291	NS
SNAI3-AS1	-0.459954	0.243368	-1.96024	0.0583424	NS
EPGN	0.55891	0.365433	1.9602	0.0583475	NS
ZNF529-AS1	0.64036	0.574348	1.96014	0.0583551	NS
SASS6	0.6311	0.933601	1.96009	0.0583615	NS
LIPJ	0.113076	0.061384	1.95946	0.058438	NS
NAPSB	1.54366	3.2091	1.95917	0.0584731	NS
TNFRSF8	-0.156841	0.0728067	-1.95867	0.0585338	NS
TBC1D9	-0.328526	0.369205	-1.95836	0.0585719	NS
GPRASP2	-0.937582	0.428609	-1.95829	0.0585803	NS
CD4	-0.992221	2.44704	-1.95748	0.05868	NS
POLM	-1.14247	1.64412	-1.95599	0.0588619	NS
FAM204A	0.64808	3.16847	1.95582	0.0588828	NS
LOC100419583	-1.2219	3.22439	-1.95499	0.0589848	NS
P2RX4	-0.865329	0.934951	-1.95399	0.0591079	NS
USP53	0.376311	0.39834	1.95374	0.0591378	NS
LINC01587	-0.725483	0.331649	-1.95309	0.0592186	NS
SYNJ2-IT1	-0.21439	0.0980067	-1.95259	0.0592797	NS
SLC25A16	0.517338	0.506407	1.95178	0.0593799	NS
RPRD1A	0.494567	0.791654	1.95085	0.0594951	NS
FAM72B	0.767854	3.49123	1.95022	0.0595729	NS
HNRNPK	0.473637	7.56104	1.9496	0.0596502	NS
SHOC2	0.617527	2.59932	1.94954	0.059658	NS
C9orf85	-0.258732	0.267311	-1.94953	0.0596591	NS
LDLRAD3	0.217041	0.220781	1.9488	0.0597495	NS
ZNF559	-0.363037	0.193074	-1.94846	0.0597913	NS
COCH	0.88688	1.08704	1.94742	0.0599213	NS
PRPH2	0.364403	0.218092	1.94723	0.0599444	NS
TNNC2	0.831122	0.70227	1.94544	0.0601677	NS
TMEM176A	-1.48649	6.21353	-1.9451	0.0602111	NS
UBXN8	-0.531391	0.512491	-1.94339	0.060425	NS
ADAMTS6	0.19761	0.185029	1.94266	0.0605167	NS
ZNF585B	0.386174	0.354076	1.94132	0.0606852	NS
NBPF11	-0.575289	2.30894	-1.93938	0.0609297	NS
PMS2P9	-0.502014	0.492359	-1.93888	0.0609921	NS
ASB14	0.878081	1.54381	1.93874	0.0610101	NS
MSRB2	-0.621468	4.05509	-1.93849	0.0610422	NS
GLTPD2	-0.624065	0.374729	-1.93791	0.0611155	NS
SLC39A8	-0.496774	0.59171	-1.93777	0.061133	NS
HPS4	0.589389	0.793691	1.93685	0.0612505	NS
PPP1R16B	0.532836	1.56469	1.93504	0.0614801	NS
DCTN3	-0.835611	6.44866	-1.9336	0.0616641	NS
PDIA2	-1.07181	0.74161	-1.93133	0.0619542	NS
CLIP4	0.48386	0.848109	1.93062	0.0620446	NS
IL27RA	-0.666845	0.756861	-1.92801	0.062381	NS
PRORSD1P	0.950155	0.798769	1.92796	0.0623867	NS
NPAP1	0.135599	0.167711	1.9279	0.0623945	NS
DRAM2	-0.908687	1.17941	-1.92611	0.0626268	NS
TAF5	0.606671	3.40428	1.92594	0.0626484	NS
POP7	-1.63747	7.01256	-1.9253	0.0627315	NS
PDCD2L	0.889501	1.11956	1.9247	0.0628092	NS
KIR3DL3	0.832313	1.54851	1.92248	0.0630979	NS
SERPINA11	-0.507416	0.231962	-1.92212	0.0631449	NS
UQCRBP1	-0.861646	8.72745	-1.92167	0.0632033	NS
LINC01260	-0.735629	0.721521	-1.92139	0.0632396	NS
RNF112	0.648205	0.520453	1.92099	0.0632923	NS
LAG3	-1.1571	1.57368	-1.91868	0.063594	NS
NTRK3	0.0292711	0.01589	1.91767	0.0637261	NS
SQSTM1	-0.893456	4.03661	-1.91692	0.0638249	NS
SYNM	-0.32717	0.22584	-1.91678	0.0638442	NS
GPR155	-0.609882	3.50973	-1.91549	0.0640133	NS
LINC00501	0.0946741	0.0826575	1.91548	0.0640142	NS
FADS2	-0.751323	1.37503	-1.91483	0.0641002	NS
EBPL	-0.823844	1.5356	-1.91443	0.0641534	NS
BZW2	0.915137	2.56619	1.91369	0.0642512	NS
OR2A4	-0.920516	0.582428	-1.9135	0.0642766	NS
TNFRSF14	-0.651181	6.44322	-1.91271	0.064381	NS
NAALAD2	0.315175	0.242056	1.91203	0.0644705	NS
ARSJ	0.20846	0.15053	1.91125	0.0645741	NS
LINC00368	0.649983	0.365446	1.91108	0.064597	NS
FGF12	0.0159365	0.00865126	1.91091	0.0646195	NS
SFR1	0.851705	0.821287	1.91021	0.0647124	NS
RETSAT	-1.14567	1.83011	-1.91018	0.0647174	NS
ZNF383	-0.339533	0.242494	-1.90989	0.0647557	NS
ACADVL	-1.57951	3.66058	-1.90975	0.064774	NS
SLC22A9	0.0493233	0.0298836	1.90912	0.0648583	NS
POT1-AS1	0.0528992	0.0294399	1.90901	0.0648722	NS
HTR5A	-0.0338673	0.0154822	-1.9076	0.0650606	NS
MUC22	0.0604542	0.0572922	1.90753	0.0650699	NS
DDAH2	-1.5057	1.7204	-1.90631	0.0652332	NS
MED25	0.908149	2.09576	1.9053	0.0653697	NS
SRGAP2D	0.322722	0.412214	1.90499	0.0654106	NS
FOXO3B	-0.692808	3.27749	-1.90432	0.0655015	NS
TSPYL5	1.00526	0.975586	1.90366	0.0655895	NS
ITFG2	-0.145855	0.0666765	-1.90263	0.0657283	NS
SLC9A7	0.557054	1.13417	1.90136	0.0659007	NS
LRRK1	0.348632	0.610257	1.90101	0.065947	NS
GPR85	0.840871	0.793785	1.90001	0.0660823	NS
CYB5R4	-0.418404	0.692617	-1.89964	0.0661327	NS
AVL9	0.429282	0.562844	1.89909	0.0662071	NS
CPPED1	-0.255024	0.282535	-1.8987	0.0662608	NS
AHCTF1	0.581028	2.34558	1.89826	0.0663204	NS
RPL39L	1.04075	2.51455	1.89816	0.0663345	NS
CSRNP1	-1.30011	3.15725	-1.89805	0.0663489	NS
HOXB8	-0.735715	0.370386	-1.89753	0.0664193	NS
SULT1E1	0.0518244	0.0508697	1.89615	0.0666082	NS
CYP8B1	0.56102	0.792805	1.89452	0.066831	NS
MXRA5	-0.825831	1.00518	-1.89442	0.0668447	NS
TUBA1A	-0.592852	6.74065	-1.89341	0.0669822	NS
TOE1	1.58917	2.32488	1.89338	0.0669862	NS
CDK5RAP1	0.620451	0.682779	1.89305	0.0670326	NS
FCAR	0.334327	0.279245	1.8927	0.0670798	NS
PRR14	1.38009	3.04339	1.89258	0.067097	NS
SLAMF8	-1.38506	2.54701	-1.89158	0.0672339	NS
ST6GALNAC3	-0.0173362	0.00832191	-1.89012	0.0674354	NS
GINS1	0.744934	1.41481	1.88941	0.0675333	NS
ADH1B	-0.617295	0.491321	-1.8889	0.0676032	NS
LOC102723439	-0.255136	0.184362	-1.88879	0.0676183	NS
OR7E37P	0.730211	0.462822	1.88868	0.0676334	NS
KCTD21-AS1	0.257388	0.140715	1.88845	0.0676655	NS
PTPRG	0.0484912	0.0343265	1.88792	0.0677388	NS
AJUBA	-0.431547	0.197279	-1.88792	0.0677388	NS
SAMD7	0.177097	0.106064	1.88791	0.0677403	NS
PTPN23	0.617385	3.51535	1.88786	0.0677474	NS
PRR23A	0.437	0.378399	1.88521	0.0681156	NS
HLX	1.03967	0.975742	1.88497	0.0681483	NS
UBE2Q2	-0.464116	0.748375	-1.88406	0.0682746	NS
FLYWCH1	-0.808284	1.65793	-1.88387	0.0683011	NS
GPER1	-0.934817	0.778479	-1.88352	0.06835	NS
IL1R1	-0.463769	0.488097	-1.88261	0.0684782	NS
EMP3	-0.563421	6.13902	-1.88228	0.0685231	NS
ETS1	0.399426	4.19767	1.88215	0.0685418	NS
GPC1	0.545824	0.627381	1.88122	0.0686719	NS
NDUFAF6	-0.142778	0.1236	-1.88086	0.068723	NS
FARSB	0.61517	1.05146	1.88035	0.0687939	NS
LOC100101148	-0.239737	0.121867	-1.87894	0.0689915	NS
FGF13	0.0192156	0.012018	1.8786	0.0690399	NS
LINC01140	-0.29149	0.202585	-1.87834	0.0690762	NS
CES5A	-0.181306	0.0828829	-1.87796	0.0691302	NS
KIF18B	0.449664	0.457296	1.87396	0.0696948	NS
KLHL25	-0.230607	0.139788	-1.87263	0.0698845	NS
DIDO1	0.725093	3.01711	1.87257	0.0698925	NS
ZNF140	-0.865453	1.09813	-1.87227	0.0699351	NS
RGMA	0.272597	0.197639	1.87149	0.0700469	NS
LOC100131496	0.257264	0.139658	1.87008	0.0702476	NS
GDPD1	-0.590035	0.552368	-1.86969	0.0703031	NS
GUSBP11	-0.575235	1.40567	-1.86882	0.0704286	NS
SLC36A2	0.241801	0.183134	1.86878	0.0704339	NS
GREB1	0.0802907	0.067335	1.86794	0.0705535	NS
MRPL50	0.987122	1.18326	1.86774	0.0705828	NS
RIOK1	0.85227	1.48222	1.86719	0.0706618	NS
DUSP28	1.10978	1.32091	1.86713	0.0706702	NS
TMTC2	-0.0647762	0.0376938	-1.86677	0.0707219	NS
GNRHR	0.74981	0.828518	1.86635	0.070783	NS
COL8A1	0.185756	0.139424	1.8655	0.070905	NS
LINC00643	0.397346	0.297282	1.86537	0.0709235	NS
PLEKHG4B	0.0456106	0.0382171	1.86428	0.0710802	NS
CHIT1	-0.845613	0.495459	-1.86377	0.0711537	NS
FKBP3	0.501826	4.73091	1.86287	0.0712842	NS
HAMP	-1.35649	1.38613	-1.86235	0.0713599	NS
ZNF74	-0.49587	0.397306	-1.86196	0.071416	NS
MYOZ3	0.229054	0.124343	1.85749	0.0720653	NS
LINC00550	-0.0685516	0.0408306	-1.8565	0.07221	NS
SNORA38	-2.35287	3.0529	-1.85537	0.0723764	NS
DNAJC5	0.656307	3.57635	1.85449	0.0725053	NS
STRN3	0.514635	1.29508	1.85413	0.0725579	NS
WWOX	-0.0586486	0.049451	-1.85407	0.0725662	NS
SIAH1	1.02393	1.80783	1.85397	0.0725817	NS
KAT5	0.765564	5.4295	1.85362	0.0726328	NS
LINC01347	0.32231	0.272206	1.8532	0.0726953	NS
ANKMY2	0.744186	3.02417	1.85308	0.0727118	NS
ACOT7	0.516088	1.13338	1.85197	0.0728751	NS
SLCO2A1	-0.233939	0.224145	-1.85172	0.0729126	NS
CD274	-0.84831	1.32917	-1.85082	0.0730446	NS
RAB22A	-0.618144	1.81506	-1.85082	0.0730457	NS
CROCCP2	0.876587	1.16843	1.85067	0.0730668	NS
ZNF234	0.614263	0.674082	1.8506	0.0730781	NS
BRMS1	1.24112	3.90108	1.85011	0.0731508	NS
CLU	-1.34926	3.28798	-1.85004	0.0731605	NS
ZNF716	0.293786	0.203722	1.84852	0.0733858	NS
ADCY2	0.0150182	0.0108127	1.84819	0.0734349	NS
MRPL34	-1.05635	3.93301	-1.84814	0.0734414	NS
CHML	1.13305	2.23394	1.8481	0.0734476	NS
DPP6	0.0269102	0.0146084	1.84789	0.073479	NS
WDR41	0.289183	0.490964	1.84784	0.0734866	NS
NECAB1	0.0970399	0.0678616	1.84678	0.0736444	NS
SPRED2	-0.163482	0.111988	-1.84586	0.0737809	NS
CAHM	1.02888	0.558533	1.84484	0.0739334	NS
RAB8A	0.981504	1.98942	1.84456	0.0739745	NS
ETV6	0.552524	1.4085	1.84441	0.0739966	NS
ATF7IP	0.505065	2.54209	1.84379	0.07409	NS
GRK6	-0.578304	6.38427	-1.84269	0.0742539	NS
MACROD2	0.0692493	0.0451036	1.84185	0.074381	NS
RPS16P5	1.10607	0.892072	1.83953	0.0747284	NS
DUXAP8	0.195442	0.146418	1.83875	0.0748463	NS
ADNP-AS1	0.688856	0.818299	1.83874	0.0748486	NS
IKBKG	0.75968	3.77857	1.83846	0.07489	NS
RAB1B	1.00589	4.0936	1.83809	0.0749464	NS
WNT3	0.436312	0.272554	1.83736	0.0750565	NS
POTEH	0.460523	0.420115	1.8357	0.075307	NS
SLC28A3	-0.130217	0.0670845	-1.83499	0.0754153	NS
USP5	1.1707	2.1681	1.83474	0.0754537	NS
CD1C	-1.15431	5.87886	-1.83448	0.0754922	NS
GABRA2	0.0242207	0.0182793	1.83431	0.0755189	NS
KCNMB3	0.734798	1.35547	1.83416	0.075542	NS
LINC00933	0.602357	0.361935	1.83378	0.0755991	NS
RANBP1	0.85843	6.32377	1.83342	0.0756548	NS
LOC728392	-1.95611	5.11065	-1.83323	0.0756832	NS
GTF2E1	-0.572099	1.01144	-1.83312	0.0756992	NS
CIZ1	-0.853806	1.59062	-1.83254	0.0757885	NS
PFKP	0.788477	2.18535	1.83246	0.0758008	NS
CAMP	-1.23653	0.989305	-1.83167	0.0759204	NS
NOL10	0.303024	0.42866	1.83141	0.07596	NS
TDG	-0.855696	1.70539	-1.83023	0.0761406	NS
SH3RF2	-0.126489	0.0690492	-1.82942	0.0762646	NS
SNORD76	2.02849	1.49838	1.82885	0.076352	NS
ZNF770	1.48904	3.74781	1.82748	0.076562	NS
ALYREF	1.20988	7.14376	1.82739	0.0765759	NS
MAGOH2P	0.873696	0.474292	1.82651	0.076712	NS
CSE1L	0.734889	1.56146	1.82589	0.076807	NS
NDUFA10	0.622422	1.46349	1.825	0.0769443	NS
LMNB1	0.799627	2.0196	1.82484	0.0769696	NS
PBX4	-0.421439	0.359767	-1.82391	0.0771134	NS
PLCH1	0.0323718	0.0175733	1.82337	0.0771966	NS
PIGA	0.423996	0.28844	1.82246	0.0773371	NS
LOC102467217	0.381757	0.20724	1.82134	0.0775115	NS
SH3GL1	0.857471	2.15896	1.82011	0.0777034	NS
DTX3	-0.956514	5.63538	-1.81979	0.0777531	NS
MROH1	0.111611	0.0929033	1.81965	0.0777746	NS
ZFPM1	0.374521	0.627582	1.81923	0.0778405	NS
GOLGA8A	0.81667	2.78656	1.81868	0.0779255	NS
MYLK3	0.146619	0.136481	1.81794	0.0780413	NS
ZFX	0.72872	3.35403	1.81786	0.0780544	NS
IQCB1	-0.603856	0.980004	-1.81613	0.0783241	NS
NTPCR	0.609545	0.623648	1.81578	0.0783799	NS
TTYH3	-0.997244	2.30584	-1.81577	0.0783812	NS
EIF4A2	0.596013	7.31934	1.8155	0.0784233	NS
MAPK13	1.01151	1.36952	1.81547	0.0784286	NS
RBM38	1.14799	2.01448	1.81521	0.0784694	NS
ADSL	0.565249	3.30279	1.81469	0.0785502	NS
ERICH6-AS1	-0.31333	0.166332	-1.81435	0.0786049	NS
PLGLB1	0.610289	0.760312	1.81393	0.0786705	NS
RGMB-AS1	-0.474658	0.216986	-1.81371	0.0787045	NS
KHDRBS2	0.0362091	0.0196564	1.81342	0.0787512	NS
CKAP5	0.575168	2.61101	1.81307	0.0788062	NS
AASDHPPT	0.92178	4.31461	1.81294	0.0788253	NS
NCKAP1L	-0.819352	2.37047	-1.81288	0.0788349	NS
TG	-0.0391173	0.0206302	-1.81174	0.079016	NS
RNF4	-0.626342	1.33493	-1.81046	0.0792181	NS
FNTA	-0.783637	1.58105	-1.80993	0.0793011	NS
DSCAM-AS1	0.194529	0.105601	1.80948	0.0793723	NS
SNORD81	-2.75601	4.36506	-1.80942	0.079383	NS
RUFY1	0.6071	1.80152	1.80926	0.0794085	NS
SRPX	0.219052	0.159454	1.80447	0.0801709	NS
SCARNA2	1.8333	1.76537	1.80432	0.0801944	NS
CDKN2A	-1.03413	1.70594	-1.80383	0.0802722	NS
RAD18	-0.32846	0.384934	-1.80283	0.0804329	NS
SUPT20H	0.655801	2.55464	1.80119	0.0806965	NS
GPS1	-0.821629	5.86596	-1.80087	0.0807483	NS
C10orf67	0.0287907	0.0167171	1.80078	0.0807628	NS
EP400	-0.476364	2.5857	-1.80073	0.0807697	NS
HSBP1	-1.03905	4.03352	-1.80007	0.0808761	NS
ICOS	-0.287936	0.131628	-1.79854	0.0811242	NS
USP39	0.71649	1.8403	1.79703	0.081368	NS
TNFRSF18	-1.13898	1.37991	-1.79668	0.0814237	NS
FH	0.869008	3.24901	1.79558	0.0816031	NS
ACVR2B	0.641107	0.830597	1.79549	0.0816175	NS
PDE2A	0.21099	0.151694	1.79543	0.0816264	NS
DIO2	0.903573	0.866797	1.79512	0.0816776	NS
KANK3	-0.523234	0.454998	-1.79503	0.0816914	NS
CCDC39	0.202279	0.157701	1.79397	0.0818642	NS
LINC00574	0.066132	0.0467623	1.79352	0.081937	NS
MAGEA9	1.37112	1.1919	1.79216	0.0821593	NS
PIGB	-0.565559	0.697875	-1.79206	0.0821753	NS
SNORD104	-2.75318	3.96258	-1.79178	0.0822213	NS
ECI1	-1.0501	5.02667	-1.7917	0.0822345	NS
SAMHD1	0.682475	2.39383	1.79148	0.0822699	NS
C4orf46	1.21657	1.75286	1.79087	0.08237	NS
ZNF717	0.195218	0.160395	1.79068	0.0824012	NS
RPA1	0.644395	1.68702	1.79038	0.0824508	NS
RDH16	-0.434287	0.198531	-1.7854	0.0832685	NS
ZNF135	-0.748428	0.929778	-1.78475	0.0833766	NS
FSD1L	0.195793	0.19634	1.78469	0.0833872	NS
TIGD2	-1.05443	0.717433	-1.78371	0.0835481	NS
PEX6	-0.543955	0.464955	-1.78322	0.0836305	NS
NOL8	0.659001	4.15341	1.78205	0.0838241	NS
COL1A2	-1.17955	3.74485	-1.78128	0.0839521	NS
FIZ1	1.08929	1.87978	1.78123	0.0839604	NS
FRY-AS1	0.687772	0.544892	1.78019	0.0841338	NS
ITGAD	-0.11847	0.0541576	-1.77984	0.0841918	NS
LOC100129434	0.0712696	0.0619727	1.77897	0.0843363	NS
COLEC12	-0.17243	0.148489	-1.77862	0.0843942	NS
TOP1MT	0.529225	0.728364	1.77713	0.0846438	NS
PTTG1IP	-0.445962	5.01315	-1.777	0.0846659	NS
ZFC3H1	-0.764457	3.20947	-1.77654	0.0847436	NS
GCOM1	0.357242	0.519128	1.77591	0.0848485	NS
POLH	1.08735	2.81729	1.77579	0.0848691	NS
TTC38	-0.705025	1.21395	-1.77532	0.0849474	NS
ACVR1	0.22653	0.209607	1.77499	0.0850034	NS
CST3	-1.18761	5.34628	-1.77465	0.0850602	NS
DCUN1D5	0.743339	1.24168	1.77455	0.0850777	NS
DDIAS	0.558453	0.690273	1.77368	0.0852231	NS
CNOT11	0.997113	4.41184	1.7734	0.0852706	NS
TUBB4A	-0.773544	0.768245	-1.77282	0.0853689	NS
MAGEA9B	1.12277	0.975648	1.77243	0.0854334	NS
KIR2DL3	0.740159	2.01472	1.77225	0.0854651	NS
PROSER2	0.238503	0.154597	1.77139	0.0856099	NS
CECR2	0.029697	0.0178171	1.77123	0.0856362	NS
RAB32	-0.803186	0.94161	-1.76977	0.0858835	NS
ABHD16B	-1.42046	1.60049	-1.76916	0.0859881	NS
MYBPC2	-0.450983	0.300295	-1.76911	0.085996	NS
SLC16A9	0.604719	0.947873	1.76903	0.0860086	NS
HSPA1L	-0.557695	0.440117	-1.76762	0.0862485	NS
BSPRY	0.738269	1.014	1.76757	0.086257	NS
ENOPH1	0.763655	1.07473	1.76736	0.086294	NS
C5orf15	0.850163	4.1195	1.7667	0.0864059	NS
RAD9B	-0.197725	0.0931019	-1.7666	0.0864224	NS
UNK	0.558257	0.616376	1.76542	0.0866231	NS
SLCO5A1	-0.143605	0.0663798	-1.76539	0.0866285	NS
ADCK1	-0.110441	0.0770033	-1.76503	0.086691	NS
KCNH2	-0.479907	0.361952	-1.76482	0.086726	NS
ORM2	-1.35952	1.25089	-1.76473	0.0867419	NS
RPL23AP7	0.349522	0.572337	1.76472	0.0867428	NS
MUSTN1	1.24149	0.928487	1.76459	0.0867658	NS
SFXN4	0.977398	3.6046	1.76446	0.0867875	NS
ZNF300	-0.47843	0.288378	-1.76432	0.0868115	NS
NBPF8	-0.535685	2.19989	-1.76372	0.0869146	NS
CASC11	0.0151608	0.0118797	1.7629	0.0870551	NS
PGAM2	0.562737	0.305486	1.76184	0.0872364	NS
MIB2	1.15055	2.29788	1.76179	0.0872454	NS
LY6E	1.36218	5.33301	1.76135	0.087321	NS
PLEKHA1	0.441199	0.871299	1.76047	0.0874721	NS
NAV3	0.0347249	0.0219135	1.76046	0.0874745	NS
NEDD4	-0.159472	0.186566	-1.76021	0.0875173	NS
LOC100133077	0.263228	0.142895	1.75985	0.0875784	NS
HYI	-1.48212	2.54167	-1.75953	0.0876335	NS
ICE1	-0.597335	1.17735	-1.7592	0.0876914	NS
CNKSR3	-0.0956599	0.0549003	-1.75908	0.0877123	NS
HMGA1	0.656299	7.95072	1.75768	0.0879539	NS
TOM1L1	-0.315263	0.348473	-1.75752	0.0879807	NS
TMEM255A	-0.055484	0.0253641	-1.75689	0.0880895	NS
CHORDC1	-0.743768	3.91027	-1.75585	0.08827	NS
UNC13A	-0.123686	0.064702	-1.75494	0.0884293	NS
PEX13	-0.484239	0.898684	-1.7548	0.0884526	NS
CAMK2D	0.342591	1.84996	1.75448	0.0885079	NS
TMEM169	-0.421033	0.376932	-1.75021	0.0892526	NS
OLFM1	-0.307965	0.33891	-1.74993	0.0893033	NS
NPHP4	0.174029	0.157111	1.74967	0.0893486	NS
ZNF528-AS1	0.842859	0.693414	1.74958	0.0893635	NS
GVINP1	-1.04064	5.27712	-1.74906	0.0894546	NS
CXADR	-0.100252	0.0597482	-1.74888	0.0894867	NS
SULT2A1	-0.108804	0.0497388	-1.74848	0.0895575	NS
EDC3	0.427193	0.633756	1.74842	0.0895675	NS
ST7-AS2	-0.0679639	0.034357	-1.74836	0.0895775	NS
QPRT	-0.331283	0.282995	-1.74696	0.0898234	NS
RFX6	0.275541	0.14958	1.74636	0.0899302	NS
APOOP5	1.06584	0.6228	1.74513	0.0901468	NS
LAT	-1.33844	2.48849	-1.74401	0.0903435	NS
ST8SIA1	-0.0839748	0.0897161	-1.7418	0.0907352	NS
RALGPS2	0.609603	1.21609	1.74008	0.0910417	NS
CYP27B1	-0.960126	0.797212	-1.73993	0.0910682	NS
NELFB	0.943261	3.63597	1.73982	0.0910872	NS
APOOL	0.434185	0.693704	1.73953	0.0911394	NS
RPL23AP32	1.44594	1.97478	1.73709	0.0915752	NS
PKD1L3	-0.271699	0.167782	-1.73671	0.0916428	NS
ORC1	0.423071	0.42084	1.73651	0.0916785	NS
GTF2IRD1	0.099149	0.104802	1.73561	0.0918403	NS
GFRAL	-0.00977894	0.00560796	-1.73353	0.0922136	NS
CREB3L2	0.538193	2.51383	1.73315	0.0922829	NS
LRIF1	0.346952	0.434977	1.73243	0.0924128	NS
SVOP	0.0232385	0.0301533	1.73221	0.0924525	NS
FAM157C	-0.238474	0.481126	-1.73218	0.0924577	NS
YPEL1	-0.554389	3.48645	-1.73198	0.0924933	NS
ALKBH5	0.985314	3.56133	1.73149	0.0925811	NS
SNORA74A	1.64216	1.59572	1.73145	0.0925898	NS
COL22A1	-0.0124577	0.00569493	-1.7314	0.0925987	NS
ZNF852	-0.341767	0.176896	-1.73068	0.0927278	NS
ZNF529	0.413153	0.634796	1.73041	0.0927772	NS
PM20D2	0.574398	0.991287	1.72898	0.0930352	NS
SPATA13	-0.298984	0.746732	-1.72891	0.0930494	NS
M6PR	-0.536664	6.07282	-1.72861	0.0931029	NS
EVA1B	-1.59109	2.52098	-1.72799	0.0932155	NS
ZNF708	0.611657	0.937252	1.72773	0.0932627	NS
NMUR2	0.41585	0.225747	1.72671	0.0934484	NS
MRPL36	1.37111	2.04452	1.72648	0.0934903	NS
GUCA1B	-0.181039	0.130124	-1.72621	0.0935382	NS
GIMAP5	-1.29656	2.35312	-1.72509	0.0937425	NS
KCNK3	-0.303784	0.196826	-1.72502	0.0937568	NS
CACNG2	0.0213901	0.0133354	1.72475	0.0938056	NS
GPR26	0.145692	0.102539	1.72414	0.0939176	NS
FAM72D	0.655779	3.15622	1.72331	0.0940693	NS
ZNF594	0.37875	0.374281	1.72229	0.0942547	NS
SPRED1	-0.417713	0.814675	-1.72229	0.0942552	NS
SCOC	0.339518	0.629554	1.72212	0.0942861	NS
URI1	0.534305	2.07087	1.72035	0.0946114	NS
YBX3P1	0.911913	0.997566	1.7201	0.0946573	NS
WDR45	-0.637975	1.14751	-1.72002	0.0946717	NS
NAALADL1	0.91226	1.79668	1.71959	0.0947509	NS
PILRA	-0.439231	0.440678	-1.71948	0.0947717	NS
SCHIP1	0.0721476	0.0579788	1.71929	0.0948059	NS
SLC7A8	-0.512643	0.63921	-1.71791	0.0950607	NS
TM6SF2	-0.364075	0.166434	-1.71673	0.0952792	NS
TXNRD3	-0.166925	0.115317	-1.71465	0.0956646	NS
MEIS3P1	-1.15937	1.73479	-1.71444	0.0957029	NS
KCNJ14	0.401288	0.351111	1.71385	0.0958122	NS
SEC1P	-0.334829	0.266373	-1.7128	0.0960077	NS
RAB3B	0.354937	0.740627	1.71242	0.0960785	NS
DTL	0.630832	1.42287	1.71175	0.0962031	NS
CRYZL1	-0.348002	0.325701	-1.71174	0.0962053	NS
HAX1	1.64504	4.41775	1.7105	0.096437	NS
ARHGAP39	-0.0916998	0.0652746	-1.7098	0.0965669	NS
QKI	0.537451	2.85885	1.70927	0.0966672	NS
TMEM108-AS1	0.349325	0.225645	1.70912	0.0966941	NS
EIF4E	0.652471	1.74542	1.70879	0.0967573	NS
NEURL2	-0.389525	0.22124	-1.70826	0.096856	NS
PCSK6	-0.111967	0.051185	-1.70812	0.0968822	NS
FAM83D	0.725623	0.837805	1.70799	0.0969072	NS
CEL	-0.357467	0.21592	-1.70785	0.0969321	NS
MAPT	0.114699	0.0745045	1.70719	0.0970575	NS
RNF180	-0.0924408	0.060332	-1.70677	0.097136	NS
METTL2B	-0.666572	1.76799	-1.70664	0.0971603	NS
PCSK2	0.0715838	0.0543659	1.70648	0.0971911	NS
TGFBR3L	-0.543782	0.314465	-1.70586	0.097307	NS
KIR2DL4	0.770809	1.77031	1.70584	0.0973099	NS
ALG8	0.507108	0.528203	1.70539	0.0973947	NS
ARHGAP8	-0.127634	0.0648289	-1.70485	0.0974972	NS
SHISA9	0.0195201	0.0122758	1.7043	0.0976008	NS
ELOVL1	1.57933	3.69069	1.70344	0.0977634	NS
PPP1R26	0.750076	0.736921	1.70309	0.0978295	NS
KIDINS220	0.609695	2.10835	1.70221	0.0979956	NS
C7orf25	-0.85668	0.617761	-1.70125	0.0981772	NS
P3H2	0.287686	0.271236	1.69994	0.0984267	NS
CD68	-1.63755	5.81587	-1.69896	0.0986129	NS
N4BP1	-0.665486	1.28717	-1.69893	0.0986184	NS
IL1R2	-0.820767	2.3981	-1.69878	0.0986466	NS
UBE2K	0.604533	2.26397	1.69851	0.0986996	NS
PRPS2	0.659363	1.04662	1.69821	0.0987557	NS
LINC00508	0.0141601	0.0103594	1.69716	0.0989564	NS
BSG	-0.95989	2.76242	-1.69684	0.0990175	NS
LINC00417	1.28099	2.82178	1.69673	0.0990382	NS
RPL23AP82	0.223117	0.257634	1.69584	0.0992079	NS
DCAF13P3	-1.68901	5.44162	-1.69575	0.099226	NS
ZNF395	1.02165	2.80212	1.69528	0.0993151	NS
UBE2D1	0.77365	1.97492	1.69516	0.0993393	NS
TESK2	0.334062	0.431644	1.69511	0.0993476	NS
FAM13C	-0.224678	0.160151	-1.69423	0.099517	NS
SMIM10	1.37009	1.57789	1.69407	0.0995466	NS
COMMD7	-0.607175	2.8644	-1.69406	0.0995495	NS
RGS18	-0.294787	0.17615	-1.694	0.0995615	NS
SNORD83A	-1.84101	1.3258	-1.69382	0.0995962	NS
SNORD89	-0.355694	12.9429	-1.69317	0.0997201	NS
UBC	-0.440579	9.75142	-1.69298	0.099757	NS
NSG1	0.707333	1.53358	1.69264	0.0998227	NS
MIPEPP3	-0.0756689	0.040147	-1.69258	0.0998328	NS
XPNPEP3	0.498093	0.864063	1.69231	0.0998852	NS
SNORD79	2.79107	7.69259	1.69221	0.0999051	NS
SNORD62A	1.24513	0.675927	1.69187	0.0999703	NS
POPDC2	-0.390367	0.277039	-1.69175	0.0999926	NS
DNM1P46	0.0842502	0.0805277	1.69172	0.0999992	NS
SDE2	-0.639458	0.859252	-1.69161	0.10002	NS
RBM20	0.101631	0.0551709	1.69122	0.100095	NS
USP8	0.470294	1.93517	1.69119	0.100101	NS
RSRP1	-0.454513	3.07444	-1.69111	0.100117	NS
SYT14P1	0.696168	0.37792	1.69106	0.100126	NS
CUEDC1	0.285959	0.365586	1.69093	0.100152	NS
HEXIM2	0.946777	1.18717	1.69012	0.100308	NS
RCSD1	0.657638	1.76166	1.69007	0.100317	NS
SFXN3	-0.988313	1.66594	-1.69003	0.100325	NS
RNASEH2B-AS1	0.288841	0.196421	1.68965	0.100398	NS
SNORD62B	1.14239	0.620153	1.68942	0.100443	NS
TPRG1	0.0420824	0.0228447	1.68902	0.100521	NS
UBXN7	0.682792	1.54109	1.68886	0.100551	NS
ACTL10	1.00236	0.746211	1.68837	0.100645	NS
CNNM1	0.152575	0.0889515	1.68818	0.100683	NS
MYOG	0.646661	0.351044	1.68817	0.100685	NS
SERPINI2	0.257532	0.139803	1.68813	0.100693	NS
SH2D3A	-0.870149	3.80437	-1.68809	0.100699	NS
DMXL2	-0.435262	0.678321	-1.68788	0.100741	NS
RABL6	0.842612	2.08542	1.6873	0.100853	NS
RBFOX1	0.0112618	0.00611354	1.68686	0.100939	NS
LOC550113	0.301983	0.163933	1.68665	0.10098	NS
SZT2	-0.541294	1.99998	-1.68654	0.101	NS
METTL1	1.3311	2.30193	1.68653	0.101003	NS
GNG4	0.122117	0.104183	1.68623	0.101061	NS
FOXCUT	0.636712	0.345644	1.68598	0.101109	NS
VMA21	-0.687265	5.4019	-1.68563	0.101177	NS
IMPA2	0.431476	0.649111	1.68516	0.101269	NS
AKNA	0.49914	3.52822	1.68507	0.101287	NS
LINC00971	0.0324094	0.0343282	1.68494	0.101312	NS
TCN2	-0.844098	1.17979	-1.68428	0.101441	NS
MSI2	0.115042	0.120949	1.68418	0.10146	NS
DCLRE1C	0.557211	2.04775	1.68353	0.101586	NS
LL22NC03-63E9.3	0.216017	0.172247	1.68308	0.101674	NS
WDR4	0.68163	1.36465	1.68307	0.101677	NS
AP1S3	0.518595	0.966831	1.6828	0.10173	NS
DDIT4L	0.413339	0.224384	1.68205	0.101876	NS
REM2	0.499229	0.27101	1.68192	0.1019	NS
CNRIP1	0.357184	0.324341	1.68192	0.101901	NS
UBXN2A	0.207797	0.202177	1.68184	0.101917	NS
L3HYPDH	-0.196242	0.105184	-1.68165	0.101955	NS
ELMO3	-0.82729	0.611747	-1.6812	0.102043	NS
C1QTNF2	0.209143	0.158514	1.68058	0.102163	NS
CLINT1	0.627074	4.01147	1.67967	0.102342	NS
CFAP69	-0.140546	0.0981791	-1.67944	0.102387	NS
P4HA3	0.0816741	0.0443374	1.67934	0.102406	NS
DNAJC15	-0.543863	1.8908	-1.67884	0.102506	NS
ENY2	1.11676	3.68718	1.67854	0.102565	NS
LINC00598	-0.029362	0.0229474	-1.67835	0.102601	NS
TLDC2	0.874296	3.59995	1.67796	0.102678	NS
MPHOSPH6	-0.933177	1.71775	-1.67794	0.102682	NS
IGFL4	0.0598192	0.0324733	1.67785	0.1027	NS
HECW1	0.0257169	0.0139606	1.67785	0.1027	NS
AMPD2	-0.947661	1.62001	-1.67755	0.102759	NS
ARHGAP11B	0.340596	0.313073	1.67733	0.102802	NS
LINC01583	0.109704	0.0716791	1.67625	0.103016	NS
OSBPL11	0.545381	2.67933	1.67596	0.103073	NS
LOC574538	0.347437	0.188608	1.6753	0.103203	NS
ZNF860	0.608385	0.770775	1.67468	0.103326	NS
TAOK2	0.836891	2.17912	1.67392	0.103477	NS
LRRC24	0.367966	0.199753	1.67375	0.103509	NS
PLXNB3	0.38453	0.218552	1.67332	0.103596	NS
DUSP5P1	0.521529	0.283116	1.67278	0.103701	NS
TTC23	0.0910988	0.062108	1.67276	0.103707	NS
C10orf95	0.654397	0.401562	1.67262	0.103734	NS
NUDT12	-0.597449	0.524511	-1.6724	0.103777	NS
TINF2	-1.61498	5.19729	-1.67228	0.103802	NS
ABCD1	-0.332685	0.473511	-1.67051	0.104153	NS
SKA1	0.942072	2.03734	1.66926	0.104402	NS
MEIS1-AS2	0.784522	0.425883	1.66922	0.10441	NS
PIK3CD	0.312253	3.23304	1.66888	0.104478	NS
NATD1	0.613915	0.827088	1.66834	0.104586	NS
CDK17	0.622582	1.70523	1.6683	0.104594	NS
BLACE	-0.160364	0.114365	-1.66791	0.104672	NS
KIAA2026	-0.466096	2.58955	-1.66779	0.104696	NS
TMED6	-0.488347	0.314313	-1.66755	0.104744	NS
TSEN2	-0.179958	0.128613	-1.66723	0.104808	NS
SLC35E3	-0.738693	3.05628	-1.6655	0.105155	NS
POP5	1.41252	3.46427	1.66454	0.105348	NS
PNPLA1	0.027492	0.0206671	1.66407	0.105443	NS
TBC1D1	0.364451	1.46325	1.6636	0.105537	NS
CIDEB	-0.938177	5.03958	-1.66333	0.105592	NS
GIPC2	-0.19641	0.116332	-1.66291	0.105676	NS
TCTA	-1.34308	2.93959	-1.66256	0.105747	NS
PCDHB16	-0.456099	0.838622	-1.66246	0.105768	NS
B3GALT4	-1.48829	4.65239	-1.66201	0.105858	NS
SYS1-DBNDD2	-0.658963	0.960738	-1.66201	0.105858	NS
ARAP2	-0.352861	0.647902	-1.66146	0.105969	NS
BDKRB1	0.216667	0.130467	1.6614	0.105981	NS
ZNF790-AS1	0.149057	0.0809166	1.66126	0.106009	NS
RCN2	1.02285	2.68252	1.66047	0.106169	NS
CDC5L	0.573445	1.18195	1.66008	0.106248	NS
CDK19	0.340477	0.470004	1.65953	0.10636	NS
CRB2	-0.284985	0.130279	-1.65926	0.106414	NS
ABCF2	0.82678	4.88464	1.65903	0.106461	NS
SNX20	-0.334494	0.211666	-1.65884	0.1065	NS
SLC9B2	0.280019	0.339716	1.65844	0.10658	NS
ZMYM6	0.534105	1.07186	1.6582	0.106631	NS
RNF126	0.562073	5.99282	1.65803	0.106663	NS
ECI2	0.709696	1.03292	1.65797	0.106676	NS
LINC00635	0.236953	0.128631	1.65715	0.106843	NS
L1TD1	0.596299	0.356351	1.65703	0.106867	NS
LTA	-1.09156	1.89097	-1.65697	0.106879	NS
ZNF711	0.519554	0.528442	1.65657	0.106961	NS
CYP2D6	-0.665573	0.402078	-1.65573	0.107131	NS
UTP14C	0.443246	0.240619	1.65558	0.107163	NS
CHAMP1	1.33262	2.35716	1.65541	0.107198	NS
REEP4	-0.424056	6.45948	-1.65353	0.107581	NS
IMPG1	0.0540397	0.0293359	1.6532	0.10765	NS
VWA2	0.121605	0.0826627	1.65313	0.107664	NS
ZNF513	0.997309	5.57448	1.65291	0.107708	NS
BOC	-0.616585	1.56124	-1.651	0.108101	NS
GOLGA6L22	0.107792	0.180804	1.65057	0.108188	NS
SNHG1	-1.03691	6.68924	-1.64958	0.108391	NS
RNPS1	0.723504	3.8693	1.64919	0.108473	NS
NPY6R	0.448075	0.323811	1.64856	0.108602	NS
GJB3	0.585523	0.317855	1.64848	0.108619	NS
RGS9BP	0.278316	0.247309	1.64807	0.108703	NS
ZFAND1	-0.63628	1.2535	-1.64798	0.108723	NS
ZNF766	-0.766061	1.83749	-1.64722	0.108878	NS
SNAP47	0.396492	0.61325	1.64663	0.109001	NS
SEC24B	0.42447	0.721859	1.64638	0.109053	NS
MAP3K13	0.384506	1.05339	1.64635	0.109059	NS
ZNF385A	-0.752974	1.30501	-1.64594	0.109143	NS
SIGLEC14	-0.39102	0.50266	-1.64574	0.109186	NS
AGBL2	-0.168667	0.188501	-1.64553	0.109229	NS
SNX3	0.674531	2.3712	1.64355	0.10964	NS
MAPK15	0.332564	0.180535	1.64317	0.109719	NS
TTC12	0.19806	0.265158	1.64307	0.10974	NS
ZNF577	0.198032	0.187944	1.64285	0.109784	NS
PON2	-0.712793	1.04358	-1.64222	0.109916	NS
ERP27	-0.397453	0.358687	-1.64218	0.109924	NS
C1orf87	0.0631315	0.035677	1.64203	0.109955	NS
CYLD	-0.596255	2.64989	-1.64177	0.110011	NS
ORM1	-1.27081	1.19362	-1.64143	0.110081	NS
LOC101927272	-1.17571	1.43046	-1.64136	0.110095	NS
LSM14B	0.915853	1.47864	1.64121	0.110126	NS
FAM138C	0.202731	0.110054	1.64085	0.110201	NS
HOXA4	-0.765201	0.74265	-1.64084	0.110204	NS
SNORD26	-1.34651	12.944	-1.64082	0.110207	NS
DCX	-0.0178152	0.0132501	-1.64078	0.110217	NS
NOSIP	0.699538	1.28932	1.64061	0.110252	NS
AEN	0.888841	1.53706	1.6405	0.110275	NS
ABCB5	-0.0169341	0.011963	-1.64035	0.110307	NS
LIMD1-AS1	0.928312	1.52754	1.63948	0.110488	NS
COL6A5	-0.091708	0.0419237	-1.63906	0.110577	NS
EXD1	0.0687428	0.0415931	1.63878	0.110635	NS
LINC00671	-0.435184	0.31799	-1.63875	0.110641	NS
ETV7	-0.283902	0.221961	-1.63819	0.11076	NS
GPANK1	0.938311	5.00457	1.63787	0.110826	NS
LILRB4	-1.41168	3.01614	-1.63783	0.110834	NS
FZD10-AS1	0.400145	0.230797	1.63682	0.111046	NS
KRT20	-0.561854	0.256848	-1.63632	0.111151	NS
POLR3GL	-0.749914	3.91955	-1.63595	0.11123	NS
MEF2C	-0.334908	2.57052	-1.63563	0.111296	NS
AKNAD1	0.143969	0.0781545	1.63499	0.11143	NS
KCNA7	0.223069	0.267151	1.63414	0.111609	NS
PRMT1	0.779975	5.8167	1.63375	0.111693	NS
ANKRD45	0.105548	0.0621081	1.63313	0.111823	NS
FLOT1	-0.659738	5.4352	-1.63267	0.111921	NS
TEX29	0.364614	0.197934	1.63152	0.112164	NS
ICAM1	-0.94131	3.97731	-1.63144	0.11218	NS
LOC101929279	0.198079	0.107528	1.63053	0.112373	NS
ARHGAP17	0.489045	2.08557	1.63032	0.112417	NS
NUTM2A-AS1	0.124956	0.0698011	1.62945	0.112603	NS
LY86	0.60984	2.02035	1.62928	0.11264	NS
LRRC55	0.514478	0.279288	1.6291	0.112677	NS
LINC01429	0.0296486	0.0306062	1.62857	0.112791	NS
PTK2B	-0.42977	3.40042	-1.62786	0.112941	NS
PCDH9	0.033579	0.0385793	1.62762	0.112993	NS
STAG3	-0.521172	0.863846	-1.62753	0.113011	NS
LOC101927817	0.296882	0.161165	1.62707	0.113109	NS
PCDHB9	0.711558	0.918879	1.62599	0.11334	NS
LOC101929762	0.038125	0.0250678	1.62594	0.113352	NS
VEGFC	-0.124773	0.0874219	-1.62572	0.113398	NS
SH3TC2	0.143603	0.105793	1.62535	0.113476	NS
RNASEK	-0.970696	8.18512	-1.62531	0.113484	NS
UBE2T	0.939028	1.44416	1.62519	0.113512	NS
ZFHX3	0.178388	0.417243	1.62513	0.113523	NS
CHRNB2	0.200875	0.109046	1.62496	0.113559	NS
HERPUD1	-0.504878	6.49344	-1.6244	0.113681	NS
NIM1K	0.0345594	0.0187608	1.62402	0.113761	NS
BCAS4	0.62105	1.17249	1.62368	0.113833	NS
APOF	0.402864	0.37484	1.62355	0.113863	NS
TRIM32	0.996737	1.32533	1.6235	0.113872	NS
PRAC1	0.261111	0.141746	1.6234	0.113894	NS
PXN-AS1	0.618339	0.641678	1.62318	0.113941	NS
AMPD3	-0.552615	1.12548	-1.62269	0.114047	NS
MAF1	-0.493414	8.2051	-1.62258	0.11407	NS
IGIP	-1.23118	1.72194	-1.62257	0.114073	NS
BEND3P3	-0.69081	0.59607	-1.62247	0.114094	NS
PTP4A1	0.599864	1.97787	1.62211	0.114171	NS
IGDCC3	0.188383	0.115106	1.62207	0.114179	NS
ALDH1B1	-1.297	2.67012	-1.62119	0.114368	NS
UBE2I	0.448277	5.76446	1.62116	0.114376	NS
SVBP	1.04732	2.28366	1.621	0.114411	NS
INPP4B	0.046447	0.0529251	1.62099	0.114412	NS
ZNF137P	0.8415	0.938236	1.62066	0.114483	NS
SGMS1	-0.14425	0.213465	-1.62021	0.11458	NS
PAX9	0.382565	0.256293	1.61971	0.114688	NS
RPS19BP1	-0.799436	7.24401	-1.61944	0.114747	NS
SYPL2	0.344975	0.242302	1.61898	0.114846	NS
ASCL2	-1.41915	6.17844	-1.61877	0.114891	NS
YWHAG	-0.788959	3.61412	-1.61834	0.114985	NS
PPP1R14C	0.128064	0.0695202	1.61811	0.115034	NS
FOXP1	0.506617	2.19628	1.6179	0.11508	NS
TEAD3	-0.637599	0.791194	-1.61781	0.115099	NS
PYY	-0.182805	0.0835679	-1.61736	0.115195	NS
ZNF667-AS1	0.45112	0.545856	1.61706	0.115261	NS
LHX1	0.404381	0.219521	1.61695	0.115284	NS
IRGM	0.0397946	0.0321892	1.61637	0.115411	NS
EXTL3-AS1	0.462059	0.411898	1.61636	0.115413	NS
DNAJC5G	0.393861	0.24271	1.61601	0.115489	NS
PLIN2	-0.966235	1.62235	-1.61597	0.115498	NS
MAP3K3	-0.460609	3.01724	-1.61572	0.115552	NS
C1orf167	-0.23018	0.13045	-1.61496	0.115716	NS
RNF167	1.31766	4.72262	1.61475	0.115763	NS
NRIP1	0.545729	1.32897	1.61456	0.115804	NS
ADAMTS9-AS1	-0.316006	0.310832	-1.61445	0.115826	NS
HOXC5	0.33003	0.227516	1.61422	0.115876	NS
CBX5	0.491101	4.57893	1.61338	0.116061	NS
LINC01514	0.0879852	0.0642047	1.61314	0.116112	NS
CPA4	0.184213	0.142624	1.61279	0.116189	NS
CIDEC	-0.291045	0.133049	-1.61236	0.116282	NS
UBOX5-AS1	0.486581	0.713402	1.61184	0.116396	NS
PGAP2	0.56152	1.00058	1.61159	0.11645	NS
THAP8	0.601605	0.606308	1.61114	0.11655	NS
SCARA5	-0.146977	0.106909	-1.61067	0.116653	NS
BTN2A1	-0.803582	4.58185	-1.61063	0.11666	NS
EGR4	-0.408394	0.186694	-1.61033	0.116727	NS
LINC01602	0.117009	0.0970181	1.61025	0.116744	NS
MSH2	0.233312	0.381675	1.61022	0.11675	NS
ZBTB45	0.655386	1.15256	1.61012	0.116771	NS
LOC646903	-0.433338	0.198097	-1.61003	0.116792	NS
SDHA	0.505591	1.07915	1.60987	0.116828	NS
VMAC	-0.514138	0.549693	-1.60969	0.116867	NS
LILRA1	-0.55402	0.253266	-1.60945	0.11692	NS
SNORA28	-1.12913	0.516174	-1.60905	0.117007	NS
C11orf16	0.499142	0.44833	1.60889	0.117041	NS
ZAN	0.0439111	0.0247744	1.60884	0.117052	NS
NKD2	-0.0971821	0.0444261	-1.60881	0.11706	NS
KCNQ5	0.063717	0.0618095	1.60817	0.117201	NS
MFHAS1	-0.375866	2.4112	-1.60813	0.117209	NS
GRIN1	-0.194879	0.0890875	-1.60812	0.11721	NS
ANKRD34A	-0.447366	0.392754	-1.60771	0.117301	NS
TRMT61A	-0.861587	1.32128	-1.6077	0.117304	NS
GCSAML	-0.165825	0.0786692	-1.60768	0.117308	NS
TMEM221	-0.149562	0.0683711	-1.6075	0.117348	NS
ELF2	0.554302	2.11452	1.6074	0.117368	NS
TTBK1	0.0655689	0.0355946	1.60731	0.117389	NS
TRIM15	-0.388971	0.177815	-1.60727	0.117398	NS
VTRNA1-2	-1.11232	0.508489	-1.60704	0.117448	NS
SPATA3	0.345654	0.187641	1.6068	0.117502	NS
SCD	-1.00979	2.1447	-1.60653	0.117559	NS
LNX2	-0.224707	0.240731	-1.60651	0.117566	NS
GLRX5	0.967352	5.03828	1.6064	0.117589	NS
PCSK1N	0.580645	0.477984	1.60638	0.117594	NS
PHPT1	1.76006	4.77128	1.60603	0.117669	NS
SRSF12	-0.319111	0.156178	-1.60602	0.117672	NS
RBM11	-0.272929	0.124767	-1.60601	0.117674	NS
LINC01360	0.0104063	0.00668333	1.6059	0.117698	NS
UPB1	-0.0989273	0.0452239	-1.60575	0.117732	NS
TIMP4	0.662412	0.480372	1.6056	0.117764	NS
CDCA7L	0.805726	1.73484	1.60536	0.117818	NS
TMEM151B	-0.47921	0.219067	-1.60514	0.117868	NS
CHCHD1	1.81191	5.61947	1.60506	0.117884	NS
AURKB	1.3965	4.0826	1.60496	0.117906	NS
TREML1	-0.276726	0.126503	-1.6048	0.117942	NS
LINC01091	0.0254398	0.0138102	1.6046	0.117987	NS
SNORA5A	-0.95392	0.436078	-1.60442	0.118024	NS
B4GALT4-AS1	-0.17938	0.0820022	-1.60424	0.118066	NS
SRD5A3-AS1	0.174493	0.0947248	1.60418	0.118078	NS
SPOCD1	0.439524	0.354998	1.60276	0.118392	NS
C1QTNF3	0.0581677	0.0342969	1.60227	0.1185	NS
SNORD82	-0.985031	0.4503	-1.60227	0.1185	NS
STK33	0.112079	0.137513	1.602	0.118562	NS
LINC00944	-0.115806	0.0529399	-1.60148	0.118676	NS
FBXL16	0.43961	0.331787	1.60137	0.118701	NS
LOC100128361	-0.239339	0.109412	-1.60135	0.118705	NS
SENP2	0.588901	0.876863	1.60106	0.118769	NS
CCL15	-0.460902	0.210698	-1.60105	0.118771	NS
SCARNA6	-0.837847	0.383016	-1.60101	0.11878	NS
CASP8	0.468304	0.85783	1.60098	0.118787	NS
GRIA4	-0.039373	0.0240023	-1.6009	0.118805	NS
CAPN6	0.184102	0.113208	1.60087	0.118812	NS
RNF34	0.573009	4.04506	1.60084	0.118819	NS
RPF2	-0.503653	1.63898	-1.60072	0.118845	NS
TNFSF12	0.991049	4.92896	1.60062	0.118868	NS
CCR10	1.20719	1.42402	1.6005	0.118894	NS
XPNPEP2	-0.264997	0.121141	-1.60041	0.118913	NS
LINC00482	0.176416	0.11057	1.60024	0.118952	NS
PRRT3	0.716277	1.02484	1.59983	0.119043	NS
TMEM171	-0.593941	0.445158	-1.59939	0.11914	NS
KHK	-0.44919	0.270011	-1.599	0.119227	NS
ABCG1	-0.485265	2.84664	-1.59847	0.119346	NS
COL10A1	0.162736	0.123827	1.59836	0.119371	NS
SLC25A27	-0.413444	0.324837	-1.59793	0.119465	NS
TAF7L	-0.07969	0.0393942	-1.59764	0.11953	NS
TMEM119	-1.06457	1.72699	-1.59755	0.119551	NS
KNOP1	1.0287	2.75468	1.59743	0.119577	NS
HMGA2	0.0361199	0.0330217	1.59714	0.119641	NS
LOC100131289	-0.431409	0.197215	-1.59707	0.119657	NS
TMEM38A	0.285265	0.303351	1.59679	0.119721	NS
L3MBTL2	0.726384	1.11412	1.59667	0.119747	NS
SLC14A2	0.0121445	0.0102803	1.59634	0.11982	NS
LRP4-AS1	-0.0860207	0.044051	-1.59615	0.119863	NS
ALG10	1.10602	1.40234	1.5959	0.119919	NS
TFAP4	0.875135	1.72955	1.59566	0.119972	NS
ABI3BP	-0.178631	0.278427	-1.59537	0.120038	NS
PRUNE2	-0.148199	0.128885	-1.59522	0.120071	NS
CCDC17	0.430952	0.233946	1.59503	0.120113	NS
APOC3	-0.851781	0.389385	-1.5948	0.120165	NS
GLIPR1L1	-0.0695356	0.0317877	-1.59448	0.120237	NS
SNHG12	-1.3453	2.14885	-1.59421	0.120297	NS
HLCS	-0.140118	0.197739	-1.59358	0.120438	NS
KCNJ10	-0.614962	0.806499	-1.59338	0.120483	NS
PMP22	-0.638711	0.93106	-1.59331	0.120499	NS
FGA	-0.354042	0.161848	-1.59305	0.120558	NS
ZNF107	0.865124	2.14261	1.59291	0.120589	NS
SEC24A	-0.458842	0.968793	-1.59259	0.120661	NS
ELAVL4	0.0847056	0.0459831	1.59216	0.120759	NS
PRAME	-0.919584	0.920642	-1.59189	0.120819	NS
MNS1	0.435233	0.488857	1.59178	0.120844	NS
GARNL3	-0.0270135	0.0136616	-1.59172	0.120858	NS
SLC25A2	-0.553365	0.252967	-1.59172	0.120859	NS
ZNF573	0.306358	0.394545	1.5917	0.120861	NS
DLGAP1-AS2	-0.373476	0.335944	-1.59163	0.120879	NS
ECE1	0.667701	1.3625	1.59106	0.121007	NS
GHR	-0.0653369	0.0342249	-1.59073	0.121081	NS
SLC12A8	-0.0913113	0.0616883	-1.59064	0.121101	NS
DEPDC7	0.324965	0.183168	1.59033	0.121171	NS
FBXO40	0.152519	0.0827961	1.58971	0.12131	NS
PCK1	-0.438329	0.200379	-1.58966	0.121323	NS
HTT-AS	-0.448537	0.205046	-1.58963	0.12133	NS
CREG1	-0.976084	3.01649	-1.58908	0.121454	NS
APOA2	-0.463049	0.211679	-1.58883	0.12151	NS
STARD3	0.86963	3.79987	1.588	0.121697	NS
C3	-0.872021	2.06395	-1.58798	0.121702	NS
ACE2	-0.179677	0.0821381	-1.58745	0.121823	NS
FBXO4	0.342836	0.446232	1.58739	0.121836	NS
SLC35F3	-0.0743277	0.0341322	-1.58705	0.121914	NS
CYP7A1	-0.0194828	0.00890641	-1.58695	0.121935	NS
CCDC102B	-0.0859749	0.101553	-1.58666	0.122	NS
MPHOSPH9	0.356852	0.507622	1.58638	0.122066	NS
MSX1	0.660155	0.580396	1.58604	0.122142	NS
FLJ45513	-0.526628	0.240744	-1.58417	0.122568	NS
ACYP1	0.513218	0.568435	1.58415	0.122573	NS
PCAT1	0.364325	0.227164	1.58411	0.122582	NS
ACOT11	0.0755818	0.0420243	1.58331	0.122764	NS
EMC6	-1.22484	8.31504	-1.58325	0.122778	NS
SCARNA20	-0.957411	0.437674	-1.5826	0.122926	NS
NEMP1	-0.708187	1.63074	-1.58192	0.12308	NS
DUSP12	1.11901	1.75989	1.58156	0.123164	NS
PYHIN1	-0.584003	2.30895	-1.58119	0.123248	NS
FGD1	0.361947	0.481457	1.58111	0.123266	NS
LOXL4	-0.154978	0.0708473	-1.58085	0.123326	NS
ATP2B2	0.0238916	0.0157609	1.58037	0.123436	NS
DAB2	-0.565856	2.57345	-1.58025	0.123462	NS
OR2A9P	-0.639755	0.292459	-1.57897	0.123757	NS
TLR4	-0.841076	1.19449	-1.57891	0.12377	NS
LRRC26	-0.65439	0.29915	-1.57889	0.123776	NS
HOXA10	0.992552	1.34288	1.57847	0.123872	NS
KSR1	0.0798903	0.059255	1.57836	0.123896	NS
GABARAPL3	-0.289248	0.132228	-1.57806	0.123966	NS
FAM74A7	0.045639	0.0247755	1.57797	0.123987	NS
UCHL1	0.966349	1.06257	1.57775	0.124037	NS
A2ML1	0.335936	0.183903	1.5774	0.124116	NS
CTSD	-0.41565	8.27497	-1.57708	0.12419	NS
ASB11	0.172399	0.148313	1.57707	0.124193	NS
PRTG	0.280592	0.210928	1.57697	0.124217	NS
HEYL	0.360811	0.264709	1.57649	0.124327	NS
ZNF836	0.306299	0.212139	1.57641	0.124345	NS
TNNT2	-0.0670143	0.0306351	-1.57626	0.124381	NS
BRI3BP	0.458513	0.789161	1.57586	0.124472	NS
DYNC1I1	-0.0314848	0.0143931	-1.57482	0.124712	NS
OSBPL10	0.216817	0.447731	1.57429	0.124834	NS
GLT1D1	0.0357366	0.0193999	1.5734	0.125042	NS
TAL2	-0.685578	0.313407	-1.57338	0.125045	NS
WDR7	-0.11754	0.199077	-1.57324	0.125078	NS
TMEM139	-0.43383	0.198322	-1.57295	0.125144	NS
PRSS30P	0.941626	0.790817	1.57266	0.125213	NS
FGF19	0.478467	0.259739	1.57209	0.125344	NS
DOCK4-AS1	0.0217748	0.0118206	1.57208	0.125346	NS
RHOD	0.449475	0.327063	1.57193	0.125381	NS
PSAP	-0.554292	7.11685	-1.57162	0.125452	NS
CDK13	0.440153	0.914038	1.5711	0.125574	NS
TINCR	-0.0945139	0.138605	-1.57105	0.125585	NS
ANKMY1	0.219057	0.160447	1.57065	0.125678	NS
ITGAX	-0.835015	2.67651	-1.5705	0.125713	NS
FKBP14	-0.794978	1.808	-1.57022	0.125778	NS
ARMCX4	-0.0847002	0.0387201	-1.56956	0.125932	NS
FNIP2	-0.33172	0.506342	-1.56894	0.126077	NS
LOC100505912	-0.166897	0.0762957	-1.56843	0.126196	NS
C8orf58	-0.997131	1.42933	-1.56791	0.126316	NS
LOC101929268	-0.109747	0.0501702	-1.56728	0.126464	NS
POLQ	-0.381599	0.563193	-1.56701	0.126527	NS
UMODL1	-0.0820572	0.0397885	-1.56688	0.126559	NS
CECR7	0.243171	0.132007	1.56679	0.126579	NS
GPR146	0.276959	0.150349	1.56678	0.12658	NS
LINC00900	-0.149947	0.085138	-1.5667	0.126601	NS
SHC4	0.0599493	0.0358529	1.56663	0.126616	NS
SPATA9	-0.0466092	0.0213071	-1.56634	0.126683	NS
NAB1	0.7879	1.89676	1.56634	0.126684	NS
TJAP1	0.719283	4.14141	1.5659	0.126786	NS
SKIL	0.871101	2.67466	1.5654	0.126903	NS
RSPH14	-0.065423	0.0316113	-1.56497	0.127006	NS
GZMK	-1.03604	4.10289	-1.56482	0.12704	NS
CYP3A43	0.12755	0.0719247	1.56471	0.127067	NS
RHEBL1	1.28303	4.09242	1.56461	0.12709	NS
CYSRT1	0.899401	1.42411	1.56414	0.127201	NS
FOXD2	1.0056	1.25118	1.56393	0.12725	NS
LGALS1	-1.28375	5.36668	-1.5638	0.127279	NS
SNORD111B	-1.08091	0.494129	-1.56356	0.127335	NS
HIBCH	0.235157	0.30572	1.5631	0.127444	NS
CNGA1	-0.144327	0.0667747	-1.56239	0.12761	NS
LOC101929470	-0.281522	0.128696	-1.56217	0.127662	NS
C1S	-1.22459	2.80444	-1.56205	0.12769	NS
GALM	-0.490977	0.844692	-1.56168	0.127778	NS
TTC36	-0.475859	0.217535	-1.56164	0.127787	NS
PRDM12	-0.0142122	0.006497	-1.56145	0.127832	NS
MTHFD2P1	0.169784	0.129948	1.56117	0.127899	NS
BCO2	-0.163276	0.130153	-1.56091	0.127959	NS
GNG12-AS1	-0.0637708	0.0291523	-1.56091	0.127961	NS
ZNF835	0.231179	0.536972	1.56089	0.127965	NS
MIAT	-1.09784	2.70558	-1.56071	0.128008	NS
RBM15	1.1746	3.79871	1.5599	0.128199	NS
TBC1D12	-0.0824066	0.0793475	-1.55988	0.128204	NS
LOC101929234	-0.560087	0.25604	-1.55965	0.128257	NS
FAIM	0.454051	0.567515	1.55953	0.128286	NS
CCP110	-0.710471	2.39912	-1.55949	0.128296	NS
DEFA5	-1.19646	0.546952	-1.55842	0.128548	NS
MED6	0.207562	0.112677	1.55763	0.128736	NS
SESTD1	0.327237	0.547565	1.55757	0.128751	NS
NRL	0.275148	0.155595	1.55747	0.128774	NS
SNORD117	-1.54718	1.18955	-1.55711	0.128859	NS
COQ10A	-0.932482	1.00721	-1.55662	0.128974	NS
ASB8	-1.04078	2.60729	-1.55649	0.129007	NS
USP7	0.736317	2.27603	1.55624	0.129065	NS
RHOV	0.646156	0.35077	1.55606	0.129108	NS
HOXA6	-0.403785	0.184588	-1.55584	0.12916	NS
SALL1	0.187208	0.101627	1.55582	0.129166	NS
PKHD1L1	0.107707	0.0700844	1.55497	0.129367	NS
MYL6B	1.12506	2.53722	1.55428	0.129531	NS
ZFPM2-AS1	0.0142961	0.0079764	1.5541	0.129574	NS
NPRL3	0.702494	2.11086	1.55392	0.129616	NS
NUAK1	0.303254	0.296112	1.55367	0.129678	NS
TP53AIP1	0.105728	0.057395	1.55352	0.129714	NS
B3GALNT1	0.4254	0.473249	1.55348	0.129723	NS
PRKCG	-0.111563	0.0510004	-1.55345	0.129729	NS
LINC01311	0.928163	0.799097	1.55325	0.129777	NS
ASPRV1	0.0236003	0.0128116	1.55321	0.129788	NS
SIM2	-0.265195	0.251019	-1.55314	0.129803	NS
MERTK	0.107167	0.0863273	1.55287	0.129868	NS
JRKL	1.08079	1.92588	1.55251	0.129953	NS
STX8	-0.133196	0.163676	-1.5525	0.129956	NS
TAF7	1.06153	6.97384	1.55226	0.130014	NS
HDLBP	0.374957	4.11165	1.55198	0.130082	NS
CDHR3	0.24832	0.199887	1.55053	0.130428	NS
LCK	-0.610971	3.3386	-1.55034	0.130472	NS
ANGPTL1	0.755531	1.40037	1.54967	0.130633	NS
MT3	-0.501593	0.2293	-1.54945	0.130687	NS
CTC-338M12.4	-0.512212	0.433566	-1.54914	0.130762	NS
ATPAF1	0.562836	0.902451	1.54901	0.130793	NS
ZNF425	-0.185343	0.135728	-1.54853	0.130907	NS
ORAI2	0.668888	3.78556	1.54853	0.130907	NS
MN1	-0.0852476	0.0406819	-1.54843	0.130931	NS
LOC389602	0.364325	0.197776	1.54819	0.130989	NS
ZIK1	0.482492	0.338739	1.54784	0.131074	NS
CR1	-0.17829	0.240301	-1.54782	0.131078	NS
SNORD90	-1.17682	0.799708	-1.54781	0.13108	NS
ELK2AP	-0.30304	0.138533	-1.54717	0.131235	NS
UBL5	-0.643846	8.58978	-1.54716	0.131237	NS
LRRC8E	0.223317	0.143439	1.54713	0.131245	NS
RASGEF1B	-0.357106	0.44782	-1.54691	0.131298	NS
ATF1	0.391773	0.649928	1.54653	0.131389	NS
ACSL1	-0.415165	0.618929	-1.54616	0.131477	NS
NLRP7	-0.694549	1.75951	-1.54563	0.131605	NS
EVL	-0.40382	3.01074	-1.54421	0.13195	NS
LDHD	-0.437029	0.199785	-1.54379	0.13205	NS
PIEZO2	0.106658	0.0738051	1.54334	0.13216	NS
FTH1	-0.450759	9.56102	-1.54325	0.132181	NS
NUDT18	-1.32103	4.85941	-1.54275	0.132301	NS
KRT42P	0.0542599	0.036613	1.54245	0.132376	NS
RUSC1-AS1	0.764414	5.54153	1.54226	0.132421	NS
CYP2D7	-0.324361	0.148279	-1.54223	0.132427	NS
SLC30A9	0.342341	0.541488	1.54201	0.132481	NS
LOC101928663	0.206818	0.176897	1.54195	0.132498	NS
FAAH	-0.386335	0.21002	-1.54175	0.132546	NS
MFSD9	0.487534	0.530434	1.54164	0.132573	NS
HENMT1	0.80643	1.00833	1.54138	0.132635	NS
THRB	0.149448	0.198042	1.54122	0.132673	NS
ILKAP	0.600548	3.9872	1.54096	0.132737	NS
ZBTB10	-0.772165	2.57155	-1.54094	0.132741	NS
SERPINA5	-0.416518	0.190408	-1.54091	0.132748	NS
BTBD2	-0.692492	2.6964	-1.54067	0.132806	NS
LINC00940	-0.0206837	0.0094554	-1.54052	0.132844	NS
NKTR	-0.446038	4.69209	-1.54047	0.132855	NS
ARHGAP23	0.368414	0.402091	1.54029	0.1329	NS
KIF5C	-0.101579	0.0818897	-1.54023	0.132914	NS
GMNN	1.00674	2.13604	1.53977	0.133026	NS
SMCO2	-0.0269399	0.0123154	-1.53895	0.133226	NS
UBE2Q2P2	0.335886	0.450298	1.53889	0.13324	NS
ANKRD35	0.351124	0.19061	1.5384	0.13336	NS
LIN7A	0.0825631	0.04482	1.53819	0.133412	NS
PROZ	0.220881	0.119907	1.53817	0.133416	NS
BAG1	0.854092	3.40526	1.53813	0.133425	NS
ACP2	-1.08943	1.81033	-1.5381	0.133433	NS
OLFML2B	-0.333176	0.350414	-1.53809	0.133437	NS
MBNL3	0.386386	1.42353	1.53777	0.133514	NS
SAXO2	-0.0177104	0.0080962	-1.53761	0.133554	NS
INHBE	0.64195	0.528363	1.53733	0.133621	NS
LDLRAD4-AS1	0.501068	0.272008	1.53643	0.133841	NS
KCNIP4-IT1	-0.234309	0.115975	-1.53636	0.133859	NS
KRT81	-0.136389	0.0623492	-1.5362	0.133898	NS
NUB1	0.589817	3.54948	1.53565	0.134033	NS
SLC35E4	0.221241	0.231711	1.53551	0.134066	NS
EPHA4	0.218716	0.209155	1.53462	0.134285	NS
EMX2	0.308506	0.167475	1.53436	0.134349	NS
SLC25A14	-0.501188	0.708613	-1.53432	0.134357	NS
DMTN	-0.293515	0.260464	-1.53416	0.134397	NS
ABCC4	0.140688	0.185623	1.53406	0.134422	NS
SHC3	0.0484543	0.0268897	1.53405	0.134424	NS
PRAF2	1.51231	4.19519	1.5339	0.134462	NS
UBR4	-0.494786	2.54412	-1.53316	0.134644	NS
CACNB4	0.0830232	0.0757634	1.53304	0.134673	NS
SLC48A1	0.802846	2.32483	1.53303	0.134675	NS
AFAP1L2	0.0906086	0.0772502	1.53248	0.134812	NS
ANKRD44-IT1	-0.294711	0.336335	-1.53235	0.134844	NS
ADAM20	-0.138399	0.0998404	-1.53227	0.134863	NS
ZNF525	0.712243	1.54718	1.53217	0.134888	NS
COLEC11	0.260899	0.201228	1.53213	0.134897	NS
ALDOB	-0.837594	0.437928	-1.53173	0.134995	NS
KIF26A	0.120055	0.0651725	1.53149	0.135054	NS
JAM2	0.343493	0.442179	1.53083	0.135218	NS
SNORD94	-0.631409	0.288644	-1.53073	0.135242	NS
GDAP1L1	0.0202577	0.010997	1.53062	0.13527	NS
BTN2A3P	-0.52316	0.509069	-1.53016	0.135383	NS
WDR82	-0.813443	4.13308	-1.52964	0.13551	NS
KATNA1	0.271933	0.263592	1.5296	0.13552	NS
HBE1	-0.828758	0.378861	-1.52957	0.135529	NS
CWF19L2	0.453299	2.22041	1.52945	0.135557	NS
ITPK1-AS1	1.04144	1.66105	1.52942	0.135566	NS
PLD3	-0.83541	2.8627	-1.52897	0.135678	NS
LRTM1	0.231961	0.125922	1.52882	0.135714	NS
VWCE	0.304724	0.298832	1.52869	0.135747	NS
PDLIM5	0.177542	0.295134	1.52825	0.135856	NS
ZNF530	-0.257279	0.248361	-1.52781	0.135965	NS
NIF3L1	-0.769059	4.16048	-1.52713	0.136134	NS
FKBP15	-0.482444	0.767273	-1.52697	0.136172	NS
PARN	0.203301	0.515519	1.52696	0.136174	NS
THNSL2	0.624343	0.843863	1.52585	0.13645	NS
CACNA1E	-0.0773899	0.0775611	-1.52534	0.136578	NS
DNAAF3	-0.349949	0.159976	-1.52506	0.136648	NS
CCSER1	-0.00989835	0.00460849	-1.52415	0.136874	NS
PGM5P4-AS1	0.0459901	0.024966	1.52383	0.136953	NS
SNRNP70	-0.677571	6.28434	-1.52341	0.137058	NS
THEMIS2	-0.729994	4.35623	-1.52315	0.137123	NS
AK3	-0.706478	3.07287	-1.52225	0.137347	NS
SHD	-0.0610077	0.0278892	-1.52207	0.137392	NS
RELL1	0.285936	0.438882	1.52198	0.137416	NS
ACSL6	0.15694	0.116575	1.52181	0.137458	NS
TYRO3	-0.255168	0.157958	-1.52168	0.137489	NS
MSH5-SAPCD1	-0.529936	0.50286	-1.52158	0.137514	NS
FRMD8P1	-0.146145	0.0668093	-1.52073	0.137727	NS
TMEM144	-0.398115	0.427136	-1.52069	0.137738	NS
LILRA2	0.244594	0.171554	1.5203	0.137834	NS
HSD17B1	1.19274	6.73894	1.52024	0.137851	NS
DLX4	0.386722	0.209935	1.51927	0.138094	NS
LINC-PINT	0.384166	1.17089	1.51915	0.138124	NS
SLC25A19	1.01667	2.78302	1.51906	0.138146	NS
ALOX12P2	0.152458	0.082763	1.51902	0.138156	NS
AICDA	1.36493	3.23362	1.5185	0.138287	NS
NEBL	0.0399492	0.029611	1.51814	0.138377	NS
UBN1	-0.760426	3.33951	-1.51791	0.138434	NS
IDI2-AS1	0.177182	0.0961847	1.51747	0.138547	NS
ZNF431	-0.691322	2.80616	-1.5174	0.138563	NS
TBL1Y	0.127806	0.0693806	1.51715	0.138627	NS
GSTM2	-0.64663	1.86856	-1.51656	0.138774	NS
LINC00844	0.688622	0.373823	1.51633	0.138832	NS
CASP7	-0.506859	0.905822	-1.51633	0.138832	NS
FCHO2	-0.2898	0.628608	-1.51624	0.138854	NS
LOC90246	-0.604844	0.2765	-1.5162	0.138866	NS
PRO1804	-0.291337	0.133182	-1.51606	0.1389	NS
TDGF1P3	0.560562	0.339313	1.51589	0.138942	NS
HHLA2	-0.101884	0.0498553	-1.51566	0.139002	NS
IQUB	0.0560835	0.0304454	1.51548	0.139046	NS
GCSHP3	1.50676	2.53133	1.51536	0.139078	NS
STK19	0.845701	4.22191	1.51517	0.139124	NS
FAM95C	-0.350239	0.160109	-1.51496	0.139179	NS
TFAP2A-AS1	-0.442603	0.202333	-1.51469	0.139248	NS
ARGFX	0.261569	0.234399	1.51455	0.139281	NS
DNAJC7	-0.412146	4.20485	-1.51426	0.139356	NS
RABGAP1L	0.186025	0.459523	1.51423	0.139362	NS
MMP25	-0.62424	0.588421	-1.51415	0.139384	NS
SPATA6	-0.189653	0.15173	-1.51409	0.139398	NS
PPP1R21	-0.540672	1.81152	-1.51367	0.139504	NS
FOXD4L6	-0.474985	0.354036	-1.51364	0.139512	NS
CGNL1	-0.0659697	0.0526732	-1.51345	0.13956	NS
R3HDM1	-0.239896	0.334252	-1.51319	0.139625	NS
BIK	1.05898	2.00877	1.51256	0.139784	NS
CPB2	-0.102478	0.0624048	-1.51229	0.139853	NS
SEC14L5	0.0478541	0.0371183	1.51187	0.139961	NS
ZSWIM6	0.345644	0.866454	1.51184	0.139967	NS
SEC11A	0.672272	2.95539	1.51174	0.139994	NS
ZC3H7B	0.497249	1.36411	1.51168	0.140008	NS
ZNF496	0.178114	0.0966904	1.51162	0.140024	NS
LILRA5	0.547966	0.585977	1.51135	0.140092	NS
PARP4	0.369498	0.806721	1.51114	0.140145	NS
TDRD3	0.520421	2.08199	1.51092	0.140201	NS
MAMSTR	0.355015	0.20805	1.51072	0.140252	NS
TIMM17A	-0.809315	3.49593	-1.50972	0.140506	NS
FASTKD1	-0.567276	0.85772	-1.50969	0.140515	NS
FCRL4	-0.706026	0.889072	-1.50933	0.140605	NS
ELOVL2	-0.0276928	0.0126596	-1.50841	0.14084	NS
EPOR	-0.504735	0.406501	-1.50777	0.141003	NS
SPHK1	-0.959355	1.41775	-1.50715	0.141161	NS
CEND1	-0.704928	0.678145	-1.50695	0.141213	NS
SERGEF	-0.101677	0.0968352	-1.50684	0.14124	NS
FZD10	0.472252	0.256365	1.50679	0.141253	NS
E2F2	0.595252	0.884606	1.50657	0.141311	NS
CENPH	0.753765	1.56618	1.50602	0.141451	NS
EOGT	0.458473	0.840804	1.50587	0.14149	NS
C1QTNF3-AMACR	-0.161205	0.17688	-1.50582	0.141502	NS
ANKRD20A1	0.0510465	0.0386337	1.50578	0.141513	NS
KBTBD3	0.391032	0.412498	1.50573	0.141525	NS
CITED1	-0.3057	0.139748	-1.50563	0.141549	NS
SERPINB11	0.233761	0.126899	1.5056	0.141557	NS
ARID1B	0.270015	0.781234	1.50558	0.141562	NS
PLEKHG2	0.872082	2.20694	1.5047	0.141789	NS
RPUSD4	-0.688318	5.13939	-1.50453	0.141831	NS
RPP30	0.383699	0.524589	1.50436	0.141875	NS
PPIAL4D	-0.452954	0.672898	-1.50403	0.141961	NS
PPIAL4E	-0.452954	0.672898	-1.50403	0.141961	NS
JPH1	0.209994	0.157148	1.50323	0.142166	NS
PDIA3P1	-1.48944	4.17815	-1.50322	0.142169	NS
PURA	0.425327	6.17375	1.50227	0.142412	NS
ENPP6	-0.133606	0.0637195	-1.50225	0.142417	NS
AMBRA1	-0.172069	0.188952	-1.50209	0.142459	NS
NKAIN4	0.365098	0.198196	1.50203	0.142474	NS
TMEM39A	-0.631509	1.25419	-1.50174	0.142548	NS
FBXO25	0.448967	2.86837	1.5013	0.142662	NS
ZNF596	0.290652	0.222745	1.50129	0.142665	NS
MED4-AS1	0.878233	0.993391	1.501	0.142738	NS
ARMC2	-0.0187235	0.00855932	-1.50081	0.142788	NS
SNHG22	-0.725869	1.4728	-1.50075	0.142803	NS
CAMK1G	0.177248	0.0962202	1.50057	0.142849	NS
B3GALNT2	-0.352124	0.616646	-1.50023	0.142937	NS
LRRN3	0.251471	0.179485	1.50017	0.142954	NS
CDC42EP4	-0.512203	0.613366	-1.49965	0.143087	NS
DSG2-AS1	-0.328795	0.197134	-1.49939	0.143154	NS
CLIP3	-0.711016	1.3471	-1.49935	0.143164	NS
MYO7B	-0.0693732	0.0317134	-1.49877	0.143314	NS
FAM172BP	0.265851	0.144319	1.49848	0.143389	NS
SCARNA9L	1.63261	4.93348	1.49834	0.143426	NS
NRIR	0.179397	0.1057	1.49821	0.143461	NS
WDR73	0.862973	1.98166	1.49809	0.143491	NS
RCCD1	1.12272	2.98213	1.49766	0.143602	NS
ARFIP2	1.25125	3.8289	1.49756	0.143629	NS
TMEM176B	-1.20141	3.7034	-1.49736	0.143681	NS
ACTG1P20	0.846947	3.92376	1.49727	0.143703	NS
GIT1	-0.923159	2.67686	-1.49709	0.143751	NS
ENDOU	0.39697	0.235576	1.497	0.143773	NS
IGLON5	-0.0421634	0.0581428	-1.49644	0.143917	NS
JRK	0.444672	0.543616	1.49637	0.143935	NS
MUC13	-0.374344	0.175652	-1.49572	0.144104	NS
PLXNA2	0.139292	0.136987	1.4955	0.144163	NS
FAM193B	0.646412	1.00411	1.49528	0.144218	NS
KDM5D	-0.758621	1.29187	-1.495	0.144293	NS
NDUFAF4P1	0.518534	0.28149	1.49483	0.144336	NS
FEZ1	0.521556	0.699607	1.49448	0.144427	NS
ADAMTSL1	0.00975523	0.0052957	1.49447	0.14443	NS
SGPL1	-0.574084	1.62953	-1.49393	0.144571	NS
NOTCH3	-0.512632	1.15597	-1.49384	0.144593	NS
PCSK7	-0.636309	1.68177	-1.49374	0.144621	NS
LOC102724434	0.313714	0.170302	1.49322	0.144756	NS
BMP5	0.0827924	0.067212	1.49309	0.144788	NS
CENPV	0.95899	4.1995	1.49288	0.144845	NS
TPRN	-0.740011	1.17554	-1.49287	0.144847	NS
CD83	0.754305	5.87413	1.49278	0.144869	NS
AMPH	0.0141988	0.00770793	1.49276	0.144874	NS
CEP19	-0.765701	1.05697	-1.49171	0.145149	NS
TEX21P	-0.408493	0.18674	-1.49129	0.145259	NS
ELOVL2-AS1	0.00688687	0.00373859	1.49072	0.145409	NS
CARD9	-0.539261	0.51892	-1.49046	0.145475	NS
MCTP1	0.10655	0.149837	1.49032	0.145513	NS
FBXL13	0.029697	0.0181733	1.4894	0.145752	NS
LOC100506124	-0.0702019	0.0320923	-1.48905	0.145846	NS
CCKAR	0.293542	0.159351	1.48892	0.145879	NS
SDK2	-0.0340603	0.0219567	-1.48873	0.145929	NS
DCTN1	-0.569787	4.16911	-1.48804	0.146111	NS
ZNF436	-0.344241	0.285874	-1.48798	0.146127	NS
RDH10	-0.45957	0.614073	-1.48737	0.146287	NS
HSP90AB4P	0.895004	1.56237	1.4873	0.146304	NS
NTMT1	0.440221	0.923267	1.4873	0.146305	NS
LYSMD4	-0.29261	0.165935	-1.4863	0.146566	NS
RGS14	-0.898226	3.58439	-1.48615	0.146606	NS
CLSTN3	-0.724017	1.56712	-1.48602	0.146642	NS
MIA2	-0.110696	0.0523507	-1.48597	0.146654	NS
BAAT	-0.223382	0.102118	-1.48565	0.146738	NS
MT1JP	-1.11695	1.12807	-1.4856	0.146751	NS
ST3GAL6-AS1	-0.175112	0.080051	-1.48518	0.146863	NS
RUNDC3B	0.118184	0.115128	1.48448	0.147048	NS
ZCCHC7	0.296016	0.674258	1.48437	0.147076	NS
CXCL10	-1.38224	2.29927	-1.48401	0.147172	NS
SPDYE6	0.485303	1.07723	1.48359	0.147282	NS
UBE2M	1.21207	3.89639	1.48352	0.1473	NS
MGAT4A	-0.24295	0.403826	-1.4835	0.147307	NS
PCMTD2	0.709665	1.62333	1.48337	0.147339	NS
CD44	-0.76107	2.83866	-1.48287	0.147472	NS
GLIS2	0.310169	0.181623	1.48266	0.147527	NS
NDUFA4L2	1.09779	3.18667	1.48259	0.147547	NS
ASAP1	0.301515	1.08928	1.48214	0.147666	NS
EMC10	0.620197	4.33348	1.4819	0.14773	NS
TMEM59	-0.796471	1.6117	-1.48098	0.147974	NS
EPHB6	-0.472933	0.532564	-1.48012	0.148202	NS
CD7	-0.519217	7.64469	-1.47999	0.148237	NS
LRRC1	-0.446956	0.758845	-1.47989	0.148264	NS
TMEM60	-1.15378	2.73849	-1.47983	0.148279	NS
LOC102467081	-0.217645	0.209351	-1.4793	0.148419	NS
DLEU2L	1.04165	1.67683	1.47915	0.14846	NS
ARHGEF1	0.528768	3.63501	1.47907	0.148479	NS
LYAR	0.814415	1.42097	1.47873	0.14857	NS
DOCK7	0.0738942	0.102597	1.47865	0.148593	NS
PRIMPOL	-0.386799	0.533616	-1.47843	0.148651	NS
STX3	-0.438413	0.673193	-1.47837	0.148666	NS
TENM3	-0.00737495	0.00363018	-1.47823	0.148705	NS
MATN2	0.0832175	0.0716949	1.47793	0.148785	NS
PHTF2	-0.324175	0.614653	-1.47784	0.148809	NS
TMPRSS11E	0.24973	0.135568	1.47772	0.148839	NS
KANK2	0.454462	0.603342	1.47747	0.148907	NS
SOX2-OT	0.0439669	0.0298126	1.4774	0.148926	NS
RGS7	-0.00911687	0.00416771	-1.47681	0.149082	NS
RASGEF1A	-0.160936	0.156346	-1.47676	0.149095	NS
DNAJB9	-0.810072	0.99415	-1.47668	0.149117	NS
POLR1B	0.587529	1.33372	1.47593	0.149319	NS
PTGES2	-0.846035	3.83045	-1.4751	0.149538	NS
DDX11-AS1	-0.17934	0.0938693	-1.47498	0.149571	NS
SYNCRIP	0.58434	4.81843	1.47485	0.149606	NS
EIF4E3	-0.582248	1.94518	-1.47481	0.149618	NS
PDCD11	0.63362	1.78365	1.47455	0.149685	NS
RBPJ	-0.344982	1.07296	-1.4739	0.149859	NS
LOC729732	-0.0445738	0.0298319	-1.47292	0.150124	NS
LOC286297	0.0472136	0.0333283	1.47286	0.15014	NS
MAP3K1	0.678007	2.28649	1.47282	0.15015	NS
ROR1-AS1	0.190961	0.168745	1.47262	0.150205	NS
PIGV	-0.553571	0.81581	-1.47216	0.150327	NS
ZNF114	0.331605	0.309604	1.47212	0.150338	NS
RCOR3	0.566523	2.65544	1.4719	0.150397	NS
CNTN3	-0.0245066	0.011975	-1.47148	0.150509	NS
SNTN	0.0721242	0.0868997	1.47099	0.150642	NS
NTNG2	-0.170006	0.131414	-1.47048	0.150778	NS
CYB5B	-0.620115	2.16199	-1.46957	0.151025	NS
KLHL29	-0.012508	0.00784941	-1.46953	0.151035	NS
APPBP2	0.448051	1.08312	1.46933	0.151089	NS
WASIR2	-0.387707	0.271336	-1.46883	0.151223	NS
DPF2	0.819088	1.53936	1.46874	0.151248	NS
BANCR	0.372183	0.202042	1.46867	0.151268	NS
RUVBL1	0.375761	3.2013	1.46858	0.151292	NS
SPIRE1	0.192914	0.285862	1.4685	0.151313	NS
SPNS2	0.639852	1.21583	1.46836	0.151349	NS
MAPRE1	0.672682	1.70914	1.46832	0.151362	NS
ROPN1L-AS1	-0.220627	0.100858	-1.46819	0.151395	NS
SYP	-0.224684	0.122086	-1.46813	0.151413	NS
EHD2	-0.568451	1.12193	-1.4678	0.151501	NS
UCHL3	-0.580023	1.80119	-1.4675	0.151584	NS
FURIN	0.842203	4.22231	1.46743	0.151603	NS
CXCR2P1	-0.929704	0.82265	-1.46741	0.151608	NS
GFRA2	-0.0818225	0.0769134	-1.46729	0.151639	NS
ZNF273	-0.116296	0.110767	-1.46725	0.151651	NS
LOC646471	0.359086	0.307922	1.46711	0.151688	NS
PEG3	-0.3524	0.272794	-1.46682	0.151766	NS
LINC01054	0.12962	0.0966808	1.46634	0.151897	NS
MZT2A	0.865048	2.42301	1.4657	0.152071	NS
SAMD3	-0.43528	1.63914	-1.46561	0.152094	NS
AGK	-0.246856	0.500982	-1.46558	0.152104	NS
ILF2	-0.946817	5.03186	-1.46544	0.152139	NS
SEZ6	0.133907	0.0761541	1.46539	0.152153	NS
PLEKHO1	0.372272	6.94824	1.46534	0.152168	NS
EEF2K	0.450562	1.0673	1.46508	0.152239	NS
HNRNPDL	-0.320674	7.53604	-1.4648	0.152315	NS
CCDC150	0.135465	0.136189	1.4648	0.152315	NS
LINC00466	0.0280106	0.0174555	1.46467	0.152348	NS
TCAF2	0.209405	0.318584	1.46452	0.152391	NS
GSTM1	-0.839164	2.75872	-1.46434	0.152441	NS
LOC644669	0.374723	0.214489	1.46433	0.152443	NS
SND1-IT1	1.36776	4.26368	1.4641	0.152505	NS
CLDN10	0.0129341	0.00702134	1.46379	0.15259	NS
GPATCH11	-0.658461	3.21206	-1.46363	0.152632	NS
SYMPK	0.535853	2.34806	1.46358	0.152647	NS
LOC101927708	-0.0102569	0.00468887	-1.46358	0.152647	NS
PEG10	0.986348	1.61087	1.46353	0.152658	NS
SAA1	-0.90871	1.09584	-1.4634	0.152695	NS
MEIS2	0.281374	0.650416	1.46298	0.15281	NS
SART3	-0.578486	3.37137	-1.46265	0.152898	NS
TMEM183A	0.620716	0.884441	1.46215	0.153034	NS
KCNIP4	0.0189884	0.0152419	1.46209	0.153051	NS
ADPGK	0.552358	3.92495	1.46203	0.153068	NS
SEMA3C	0.149067	0.230333	1.46201	0.153073	NS
HOTTIP	0.629121	0.483605	1.46175	0.153144	NS
MMP9	-1.34656	5.43874	-1.46142	0.153233	NS
RNF144B	0.446452	0.927893	1.46135	0.153253	NS
SLX4IP	-0.115117	0.119285	-1.46128	0.153273	NS
IFT52	0.523083	0.974835	1.46118	0.153299	NS
HVCN1	-0.4896	3.66145	-1.46082	0.153398	NS
IL10	-1.08455	1.89671	-1.46039	0.153514	NS
LRRC70	-0.479194	0.21906	-1.46029	0.153542	NS
CENPN	0.707916	1.6749	1.46017	0.153575	NS
FBLN7	0.0965916	0.0807627	1.46001	0.153619	NS
CD180	0.992239	2.90837	1.45979	0.153679	NS
HIC2	-0.730852	2.58975	-1.45976	0.153687	NS
HDX	-0.0418183	0.0293136	-1.45964	0.153721	NS
ABHD8	-0.738998	1.22692	-1.45955	0.153744	NS
ACP6	-0.217258	0.178709	-1.45949	0.153761	NS
PRODH	-0.227082	0.103809	-1.45943	0.153778	NS
LRPPRC	0.536433	1.38659	1.45908	0.153874	NS
ABR	0.151582	0.226284	1.45878	0.153956	NS
GSS	0.59562	1.19875	1.45838	0.154065	NS
LOC101928535	0.0641149	0.0508089	1.45774	0.154241	NS
KIAA1549L	0.0594924	0.0322959	1.45771	0.154249	NS
DSEL	0.584249	0.653334	1.4573	0.154361	NS
ARR3	-0.152149	0.0695536	-1.4573	0.154361	NS
ILDR2	0.168893	0.118097	1.45723	0.15438	NS
SLC25A11	-0.766597	7.24279	-1.45686	0.15448	NS
FBXO11	0.468499	2.04932	1.45637	0.154616	NS
TMEM219	-1.00698	2.47824	-1.45635	0.154621	NS
GRIN3A	0.0826829	0.0600547	1.45621	0.154659	NS
TRIM3	-0.379552	0.391101	-1.4562	0.154664	NS
LOC101927550	0.520134	0.856406	1.45617	0.154669	NS
SDHAP3	0.560542	1.38714	1.45563	0.154819	NS
AMMECR1	0.256248	0.53796	1.45515	0.15495	NS
PSMD4	0.419565	6.02568	1.45484	0.155037	NS
COL24A1	0.0404245	0.0232114	1.45478	0.155052	NS
BAGE2	-0.0196692	0.0102843	-1.45442	0.155152	NS
PON3	0.158839	0.119664	1.4539	0.155295	NS
MYO18B	0.0379868	0.0210583	1.45357	0.155387	NS
GRB14	-0.0824505	0.0376917	-1.45355	0.155392	NS
BTG3	-0.790817	1.66244	-1.45298	0.155549	NS
FAT2	0.121629	0.0660272	1.45274	0.155617	NS
ANKRD46	0.344194	0.45435	1.4525	0.155681	NS
ONECUT2	-0.187469	0.0857002	-1.45218	0.155769	NS
KIF9	0.196445	0.176628	1.45188	0.155853	NS
ZFAS1	0.535898	5.6863	1.45166	0.155913	NS
ZNF79	0.231506	0.169428	1.45153	0.155949	NS
CCDC110	0.333451	0.281045	1.45149	0.15596	NS
USHBP1	0.295731	0.160539	1.45084	0.156141	NS
LOC101928847	0.132859	0.179259	1.45059	0.156209	NS
CMC1	-0.441135	1.05724	-1.45008	0.15635	NS
PDZD11	1.24647	3.26013	1.44989	0.156404	NS
PRR5	-0.651043	1.85259	-1.44967	0.156464	NS
LAMTOR2	1.10532	5.06577	1.44937	0.156548	NS
ZNF385B	0.0660994	0.0402376	1.44903	0.156643	NS
ASAH2	-0.0069208	0.00316379	-1.44895	0.156665	NS
LOC101927189	0.0560758	0.0317748	1.44886	0.156689	NS
MYL12A	0.338059	7.05344	1.44872	0.156729	NS
GINS2	0.801806	1.58844	1.44864	0.156751	NS
SLC6A15	0.243252	0.132051	1.44856	0.156772	NS
PSMD14	0.426726	0.909192	1.44852	0.156784	NS
INPP1	0.528603	0.848968	1.44812	0.156894	NS
LPP-AS2	-0.677454	0.687753	-1.4476	0.157039	NS
TRPM6	0.0840595	0.0554915	1.44747	0.157076	NS
PCDHGA12	-0.0343996	0.0157255	-1.44726	0.157134	NS
SNRPD1	0.936054	3.97243	1.44724	0.157139	NS
IL22RA2	-0.11537	0.0527406	-1.44698	0.157213	NS
CSK	0.355977	5.6051	1.44676	0.157273	NS
LOC285819	0.263029	0.16819	1.44625	0.157416	NS
METAP1D	-0.0569568	0.0468122	-1.4461	0.157458	NS
TBRG4	0.957179	1.96283	1.44575	0.157554	NS
CYP27C1	-0.105747	0.0733082	-1.44568	0.157575	NS
ADGRB2	-0.122348	0.0940195	-1.44548	0.157631	NS
SLC6A4	-0.154559	0.114726	-1.44539	0.157655	NS
FLG2	0.0620173	0.0336665	1.44532	0.157674	NS
ANKRD36B	-0.314089	2.30481	-1.44482	0.157813	NS
CENPI	-0.182953	0.208871	-1.44473	0.157839	NS
LOC100289361	-0.971335	0.700728	-1.44428	0.157966	NS
LINC01447	-0.0506558	0.0231569	-1.44421	0.157983	NS
ALK	-0.0110552	0.00717356	-1.44387	0.158078	NS
ALG14	0.0846325	0.0798124	1.4438	0.1581	NS
DBN1	0.950863	2.02203	1.44374	0.158116	NS
LINC00528	-1.30933	5.76391	-1.44325	0.158252	NS
SIAH3	0.0711905	0.0668407	1.44325	0.158254	NS
TRABD	0.41577	5.30284	1.44302	0.158316	NS
ZNF24	0.937276	3.95513	1.44286	0.158362	NS
GOLGA8B	0.611611	3.16985	1.44279	0.158381	NS
ZCCHC3	1.39944	3.57657	1.44266	0.158418	NS
PIBF1	-0.120013	0.134711	-1.44251	0.158461	NS
TCF24	0.0300565	0.0163164	1.44216	0.158559	NS
C14orf178	-0.500017	0.598182	-1.44201	0.158601	NS
CCND2-AS1	-0.255756	0.116917	-1.44197	0.158611	NS
PTDSS1	-0.53316	1.30532	-1.4412	0.158826	NS
FLYWCH2	0.895913	3.55119	1.44119	0.158831	NS
PIANP	-0.354839	0.162212	-1.44116	0.158838	NS
LINC00312	-0.626171	0.510759	-1.44087	0.158919	NS
MLKL	-0.581924	0.954199	-1.44068	0.158973	NS
ZNF569	-0.281638	0.381855	-1.44016	0.159118	NS
DLG1-AS1	0.453488	0.300807	1.43985	0.159205	NS
PALB2	-0.413723	0.673661	-1.43946	0.159317	NS
KLHL13	0.0657845	0.0514685	1.43928	0.159365	NS
DCAF11	-0.534518	5.30858	-1.43799	0.159728	NS
ROBO2	0.0155487	0.00849908	1.43729	0.159928	NS
RGPD2	0.0946669	0.213762	1.43716	0.159964	NS
SNAR-A3	-1.91187	5.89414	-1.43673	0.160084	NS
TRIM28	0.524755	7.21661	1.43661	0.16012	NS
LOC401127	0.786825	0.427134	1.43634	0.160196	NS
NEAT1	-0.375579	6.47149	-1.43626	0.160217	NS
NOC3L	0.566248	1.18406	1.43626	0.160219	NS
LOC100506606	-0.281213	0.201816	-1.43622	0.160229	NS
ZNF282	0.535997	0.769285	1.4358	0.160348	NS
CLDN12	-0.461154	0.485349	-1.4353	0.160489	NS
MS4A14	-0.265823	0.276642	-1.435	0.160574	NS
FAM221A	0.428414	0.487386	1.43498	0.16058	NS
KRT18P55	0.135856	0.0765416	1.43497	0.160582	NS
MTHFR	0.595722	4.87969	1.43486	0.160614	NS
AVPR1A	-0.482776	0.464203	-1.43454	0.160703	NS
STXBP3	-0.594505	1.90063	-1.43453	0.160706	NS
ARL13A	-0.305826	0.139806	-1.43437	0.160752	NS
RAB39B	-0.846964	1.08617	-1.43435	0.160758	NS
LUC7L2	-0.173603	0.136897	-1.43418	0.160805	NS
NAT10	0.750293	2.03885	1.43413	0.160821	NS
TTC39B	0.110404	0.112055	1.43406	0.160841	NS
HBS1L	0.600229	2.85965	1.43394	0.160873	NS
LOC101927374	0.0238017	0.0226297	1.43389	0.16089	NS
MKLN1-AS	0.21109	0.114592	1.43361	0.160968	NS
ASB5	0.164726	0.0894225	1.43334	0.161045	NS
ANKRD24	-0.0768445	0.0351289	-1.43255	0.16127	NS
LINC00578	-0.0439946	0.0268265	-1.43229	0.161343	NS
NPHS1	0.0456147	0.0620553	1.43223	0.161359	NS
CLPB	-0.145731	0.122672	-1.43218	0.161373	NS
VBP1	-0.651084	1.2986	-1.43126	0.161634	NS
ABCC5	-0.320355	0.408758	-1.43126	0.161635	NS
CCPG1	-0.408466	0.546464	-1.43106	0.161691	NS
GPM6A	0.187371	0.261731	1.43105	0.161696	NS
ST20	0.602474	1.69532	1.43079	0.16177	NS
TAL1	0.156599	0.137858	1.43063	0.161816	NS
CENPA	0.881303	1.41814	1.4306	0.161824	NS
ZNF329	0.416351	0.551474	1.43059	0.161825	NS
F2RL2	0.937528	1.33947	1.43037	0.161889	NS
CR2	-0.648933	0.981554	-1.43019	0.161941	NS
JSRP1	-0.726655	0.786933	-1.43019	0.161941	NS
ATP8B1	0.451266	1.04277	1.4298	0.162051	NS
ZNF572	0.522306	0.601703	1.42961	0.162106	NS
LOC644189	0.454195	0.412713	1.4295	0.162137	NS
LOC100507250	0.423234	0.31823	1.42925	0.162209	NS
ZNF385D	-0.0264219	0.0161065	-1.42919	0.162225	NS
NEUROD1	0.510166	0.392681	1.4291	0.16225	NS
SNORD116-21	-1.24474	0.92304	-1.42884	0.162324	NS
BTG2	1.3607	5.20571	1.42838	0.162457	NS
SLC2A1	0.513245	0.735254	1.42801	0.162562	NS
ZNF226	0.335045	0.472085	1.42788	0.1626	NS
HEPACAM	0.291706	0.180062	1.42781	0.162619	NS
D2HGDH	0.695806	1.11058	1.42776	0.162634	NS
RTN4R	-0.239976	0.146282	-1.4273	0.162765	NS
RBM48	-0.738838	5.46987	-1.42689	0.162881	NS
VPS13B	0.173061	0.467056	1.42646	0.163005	NS
UCP3	-0.241739	0.31975	-1.42624	0.163067	NS
SZRD1	0.446092	4.41605	1.42588	0.163172	NS
NUDT5	0.663649	1.34759	1.42558	0.163257	NS
EIF2S2	0.477959	5.28708	1.4254	0.163308	NS
EXO5	-0.741656	1.04282	-1.42514	0.163385	NS
SLC39A12-AS1	0.354958	0.192691	1.4249	0.163453	NS
KDELR3	0.807358	4.27677	1.42469	0.163514	NS
PLA2G4E-AS1	0.191891	0.127285	1.42461	0.163535	NS
MS4A18	-0.195223	0.105596	-1.42404	0.1637	NS
NRIP2	-0.767842	4.47537	-1.42381	0.163765	NS
KSR2	0.0663839	0.0556649	1.4235	0.163856	NS
RD3	0.196865	0.119058	1.4235	0.163856	NS
LOC102723517	0.0972251	0.0527794	1.42345	0.163868	NS
TTLL12	0.84858	2.35959	1.42342	0.163877	NS
SNRK-AS1	-0.413571	0.304064	-1.42336	0.163896	NS
FAAH2	0.0646455	0.0436456	1.42323	0.163931	NS
TAS2R43	-1.01169	1.10596	-1.42308	0.163977	NS
GIMAP6	0.89306	4.93538	1.42291	0.164024	NS
RAB14	0.538674	5.45268	1.42252	0.164138	NS
SNORD31	1.75098	2.18918	1.42244	0.16416	NS
ADAMTSL3	0.091964	0.101181	1.4223	0.1642	NS
RRP12	0.613159	1.18415	1.42218	0.164234	NS
ZNF626	0.330354	0.518537	1.42207	0.164266	NS
SLC39A1	-1.06944	3.21639	-1.42178	0.164351	NS
NUTM2B	-0.0922759	0.0939542	-1.42101	0.164572	NS
SLC38A1	0.443997	4.81342	1.42088	0.16461	NS
CRSP8P	0.721768	1.03851	1.42082	0.164627	NS
FBXL3	0.586352	1.17998	1.42067	0.164671	NS
FXR2	0.760349	1.38235	1.42061	0.164686	NS
ADGRB1	-0.0278215	0.0127184	-1.42054	0.164707	NS
CCDC22	-0.812277	2.06494	-1.42024	0.164795	NS
POLR2F	0.460239	1.63614	1.42015	0.164821	NS
IL12A	-0.266848	0.121987	-1.41981	0.164918	NS
HDAC5	-0.499428	1.0534	-1.41914	0.165113	NS
NCMAP	-0.0756599	0.058635	-1.41909	0.165128	NS
RPAIN	1.03805	2.67862	1.41824	0.165373	NS
HEPN1	0.700085	0.509669	1.41811	0.165409	NS
SERBP1	0.298344	7.03194	1.41798	0.165448	NS
C4orf33	-0.456682	0.570711	-1.41718	0.165679	NS
CCNI2	0.498919	0.618431	1.41712	0.165696	NS
ELMO1	-0.0767248	0.102344	-1.41686	0.165773	NS
RAD51	0.339821	0.511929	1.4167	0.165819	NS
RARB	0.0653431	0.0551704	1.41653	0.165869	NS
SCG2	0.322047	0.174825	1.41573	0.166102	NS
GGTLC2	-0.147953	0.0676355	-1.41573	0.166102	NS
FCER1G	-0.793792	6.55426	-1.41563	0.166129	NS
WFDC1	0.225295	0.122303	1.41525	0.166239	NS
CMSS1	-0.122808	0.18078	-1.41525	0.16624	NS
C3orf70	-0.181375	0.178783	-1.41522	0.16625	NS
KIF1C	-0.709175	3.52993	-1.41504	0.166301	NS
ABRACL	0.904495	2.82258	1.4149	0.166341	NS
CRLF2	0.0158623	0.00861096	1.41422	0.166541	NS
PRMT7	0.370503	0.472376	1.41413	0.166566	NS
PHKA2	0.40256	0.717975	1.41404	0.166594	NS
PITHD1	0.915012	2.21722	1.41399	0.166606	NS
ZIC2	-0.198482	0.101656	-1.41391	0.166631	NS
MAB21L1	-0.0446249	0.0204	-1.41344	0.166767	NS
TUBGCP3	0.306752	0.733938	1.41305	0.16688	NS
PTPRN	0.377286	0.204812	1.41291	0.166924	NS
TMEM120A	-1.08113	3.32184	-1.41287	0.166933	NS
STAP1	0.432237	0.683086	1.41257	0.167022	NS
ZNF174	1.15289	2.05981	1.41244	0.16706	NS
WEE2	-0.220391	0.124278	-1.41215	0.167145	NS
SIX5	0.903708	1.07005	1.4119	0.167217	NS
INHBA-AS1	0.0397358	0.0239411	1.41182	0.167242	NS
TGM2	-0.671464	1.6064	-1.41153	0.167324	NS
TSPO	0.832386	5.0857	1.41121	0.167419	NS
METTL17	0.891029	3.05151	1.41109	0.167454	NS
DNMBP-AS1	0.0831672	0.0688702	1.41031	0.167683	NS
KREMEN2	-0.970161	1.33727	-1.41023	0.167705	NS
NEDD4L	0.165357	0.26789	1.41022	0.16771	NS
NCKIPSD	0.478662	0.605623	1.41014	0.167732	NS
PHF13	-0.827146	1.41309	-1.40961	0.167888	NS
ATP6V1H	0.218071	0.374101	1.40938	0.167956	NS
CCDC171	-0.00919593	0.00809641	-1.40921	0.168004	NS
PTPRB	0.249984	0.401142	1.40904	0.168055	NS
ASB15	0.112003	0.0608014	1.409	0.168067	NS
LIMCH1	0.0940741	0.118706	1.40851	0.16821	NS
IFI44L	-0.858178	3.22188	-1.40819	0.168303	NS
APOM	0.727158	0.950404	1.408	0.168359	NS
DPY19L2P2	-0.335959	0.877735	-1.40785	0.168405	NS
RDM1	-0.351434	0.160656	-1.40745	0.16852	NS
BRAP	0.560275	2.16639	1.40718	0.168599	NS
ZNF542P	-0.609226	1.02514	-1.40682	0.168707	NS
LPIN3	-0.518436	0.485467	-1.40674	0.168732	NS
TLR2	-0.546932	0.759252	-1.40647	0.16881	NS
POTEKP	0.03655	0.0240392	1.40646	0.168812	NS
CARD11	0.323566	2.30431	1.40636	0.168842	NS
RPL23AP53	0.330329	0.465226	1.40614	0.168908	NS
ARID3B	-0.46591	1.05069	-1.40602	0.168942	NS
SNAR-A2	-1.80787	5.06068	-1.4059	0.168977	NS
BCL2L1	-0.470947	1.54768	-1.40588	0.168982	NS
PALD1	0.332065	0.442184	1.4056	0.169067	NS
SIRT3	-0.402213	4.3807	-1.40533	0.169146	NS
COL6A1	-1.09506	4.92019	-1.40533	0.169147	NS
SNX25	0.188677	0.211918	1.40511	0.16921	NS
SETD4	0.37668	0.54007	1.40508	0.16922	NS
CYB5D2	0.498028	0.508923	1.40507	0.169223	NS
PLA1A	-0.289839	0.296855	-1.40487	0.169281	NS
RDX	0.437569	1.07254	1.40439	0.169424	NS
SPINK2	-0.324827	0.174383	-1.40425	0.169464	NS
DAB2IP	0.186033	0.260169	1.40417	0.169487	NS
LOC100506444	0.0292455	0.0158761	1.40412	0.169501	NS
POLR3G	-0.45969	0.922792	-1.40412	0.169502	NS
TAGAP	0.926186	2.81266	1.40394	0.169554	NS
CAMK2A	0.0670503	0.0363987	1.40388	0.169573	NS
NDST3	-0.0113417	0.00954747	-1.40378	0.169602	NS
TRA2A	-0.639165	3.68612	-1.40334	0.169734	NS
ARL10	-0.160612	0.129609	-1.40319	0.169778	NS
UBE2Q1-AS1	-0.839378	0.936303	-1.40292	0.169857	NS
LOC100130331	-0.0925101	0.0819827	-1.40253	0.169974	NS
TOM1	0.504979	1.18294	1.40226	0.170052	NS
CERS4	-0.230184	0.240248	-1.40202	0.170122	NS
PRMT2	-0.594879	3.94709	-1.40202	0.170124	NS
MAPKBP1	-0.479012	1.41217	-1.40191	0.170158	NS
H6PD	-0.70348	1.68546	-1.4019	0.170158	NS
C20orf203	0.0997693	0.0636398	1.40155	0.170263	NS
CLEC4M	-0.73393	0.601187	-1.40148	0.170284	NS
SNHG15	1.03049	1.43367	1.40126	0.170348	NS
MYO3A	0.0671984	0.038161	1.40118	0.170374	NS
SDCBP2-AS1	0.229576	0.170245	1.40099	0.170429	NS
PAXBP1	-0.557543	1.08189	-1.40098	0.170433	NS
RIC8A	-0.406781	5.86888	-1.40087	0.170464	NS
MYO7A	-0.523861	0.853686	-1.40066	0.170526	NS
STAG3L5P	-1.13636	4.06146	-1.40036	0.170615	NS
TPI1	0.48363	7.43376	1.40029	0.170636	NS
FST	0.336365	0.182598	1.40004	0.170709	NS
HID1	-0.625504	0.702453	-1.39984	0.170769	NS
OR2A1-AS1	0.0990434	0.0823588	1.39921	0.170959	NS
SLC15A1	-0.338379	0.200318	-1.39912	0.170984	NS
FRA10AC1	0.515749	1.16098	1.39897	0.171029	NS
FAM89A	-0.519197	0.598043	-1.39882	0.171073	NS
ZMIZ1-AS1	0.0532304	0.0288965	1.39873	0.171099	NS
HNRNPR	0.34294	4.98418	1.39828	0.171234	NS
LHFPL5	0.125817	0.0736591	1.3981	0.171288	NS
SNORD116-17	-1.31006	1.58256	-1.39789	0.171351	NS
LINC01085	0.0951753	0.0516666	1.39766	0.17142	NS
PNMA5	1.03525	1.01008	1.39761	0.171435	NS
BCKDHA	0.614322	3.00262	1.39743	0.171489	NS
TNFSF9	0.781578	1.05207	1.39706	0.171596	NS
CTNND2	-0.0278796	0.0201967	-1.39687	0.171654	NS
ZNF592	0.411882	0.900951	1.39681	0.171673	NS
HOXB6	-0.320469	0.238011	-1.39657	0.171745	NS
P2RX5-TAX1BP3	-0.5701	4.07784	-1.39585	0.171958	NS
LINC01001	0.435904	1.80864	1.39562	0.172026	NS
CABP4	0.466368	0.812709	1.39538	0.1721	NS
MAMLD1	0.0229644	0.0169949	1.39496	0.172224	NS
CP	0.522515	1.32194	1.39478	0.172278	NS
SGCA	0.523409	0.503388	1.39456	0.172344	NS
FBXL12	-0.593401	0.621301	-1.39452	0.172356	NS
SRSF2	1.25014	5.81085	1.39371	0.172599	NS
DHX9	0.473225	2.86898	1.3936	0.172633	NS
LOC101929718	1.05265	3.84248	1.39327	0.17273	NS
NCBP1	0.603792	1.48281	1.39326	0.172735	NS
FTO-IT1	-0.897457	0.745516	-1.39306	0.172793	NS
RELN	0.0351867	0.0262306	1.39265	0.172918	NS
PRRG2	-0.328856	0.221669	-1.39263	0.172922	NS
SPIC	-0.385727	0.280273	-1.39213	0.173071	NS
OSER1	0.763467	1.70185	1.39196	0.173124	NS
SGK3	-0.226009	0.40079	-1.39168	0.173208	NS
SLC41A1	0.576701	0.938746	1.39142	0.173285	NS
PSME3	-0.506035	6.54738	-1.39118	0.173359	NS
FOXD4L1	-0.346601	0.288991	-1.39086	0.173455	NS
ING4	0.801523	5.1266	1.39062	0.173525	NS
EIF2B1	0.818608	1.85811	1.39038	0.173598	NS
MAST4	0.14658	0.273865	1.38957	0.173843	NS
DPYD	-0.0403033	0.0526105	-1.38938	0.173901	NS
ARID5A	-0.761066	1.56267	-1.38906	0.173995	NS
KIF27	-0.21875	0.181249	-1.38862	0.174128	NS
ADI1	-0.795901	2.7689	-1.38837	0.174203	NS
MRPS28	0.129234	0.0940843	1.38836	0.174206	NS
SHROOM2	-0.0211834	0.0123812	-1.38824	0.174243	NS
TM2D3	0.647675	0.946032	1.38802	0.174309	NS
ARMCX2	0.947942	1.42075	1.38798	0.174321	NS
KLRC3	-0.355474	0.162503	-1.38761	0.174433	NS
C1orf50	0.965755	2.83759	1.38715	0.174573	NS
PFDN6	-0.90852	6.46445	-1.38714	0.174574	NS
LOC101929488	0.056614	0.0374867	1.38702	0.174612	NS
METTL13	-0.570058	3.988	-1.3868	0.174677	NS
ZNF815P	-0.297296	0.359616	-1.38663	0.174729	NS
NT5M	-0.237177	0.174782	-1.38649	0.174771	NS
SCNN1G	0.0231719	0.012579	1.38628	0.174837	NS
DYNAP	0.192477	0.11662	1.38581	0.174978	NS
[truncated: 19,900 more rows]

## Sheet: Table S5.
Supplementary Table 5. Clinical characteristics of patients classified as OCI-LY19-like or Toledo-like based on CNS-preferential signature gene expression patterns
Type	Pair ID	Group	Clinical status	CNS involvement site	Patterns of CNS involvement
OCI-LY19-like	P6	sCNSi−	NR	−	−
	P6	sCNSi+	R-CNS	LMS	CNS+systemic
	P9	sCNSi−	PD	−	−
	P9	sCNSi+	R-CNS	LMS	CNS+systemic
	P12	sCNSi−	SR	−	−
	P12	sCNSi+	R-CNS	Parenchyma	CNS+systemic
Toledo-like	P3	sCNSi−	SR	−	−
	P3	sCNSi+	PD-CNS	Parenchyma	CNS+systemic
	P4	sCNSi−	NR	−	−
	P4	sCNSi+	R-CNS	CN	CNS+systemic
	P11	sCNSi−	NR	−	−
	P11	sCNSi+	PD-CNS	Parenchyma	CNS only
NR: no relapse
R-CNS: sCNSi (relapse)
PD-CNS: sCNSi (progression)
LMS: leptomeningeal spread
CN: cranial nerve
