# Supplementary material for: Transcriptomic profiling of an in vivo diffuse large B-cell lymphoma model reveals molecular programs underlying CNS dissemination
Source: Research Square preprint supplement (doi:10.21203/rs.3.rs-8729569/v1), 2026-02-18

**Supplementary Figures**

Supplementary Figure 1. FACS analysis confirming human DLBCL cells isolated from resected organs


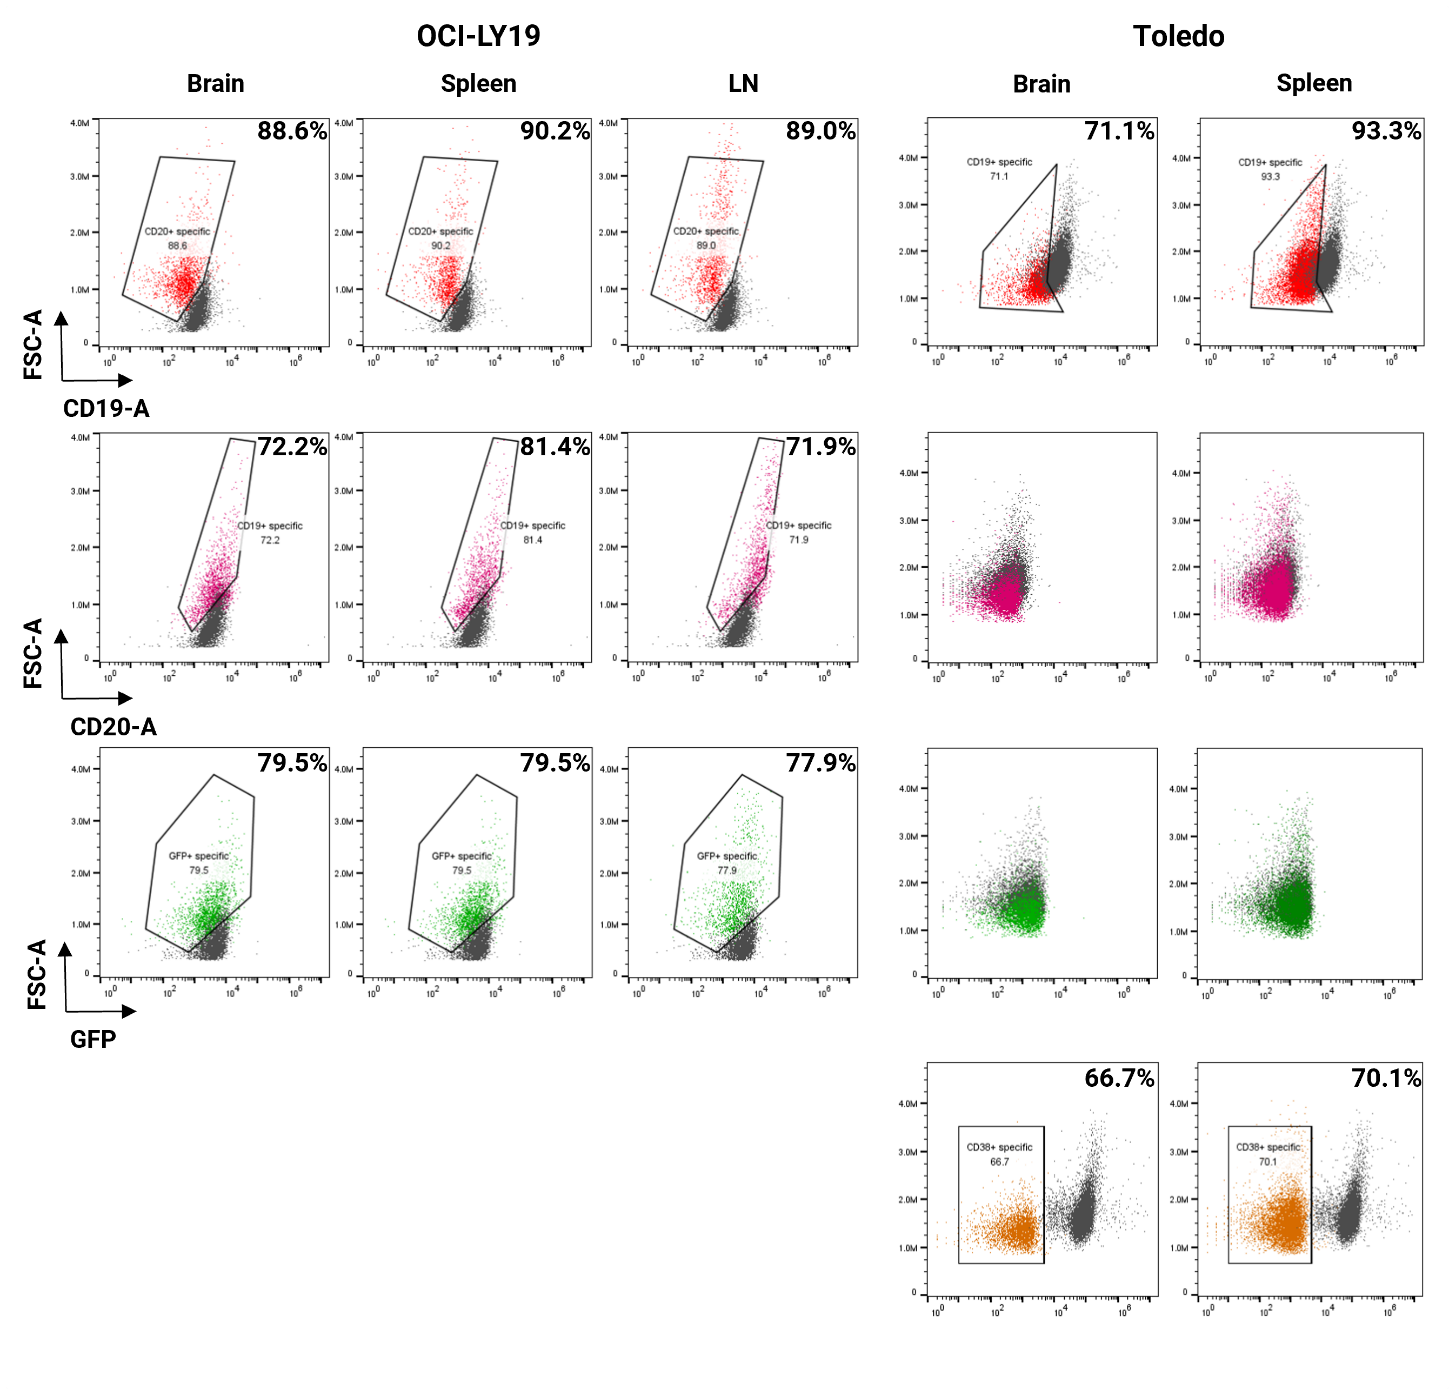


Supplementary Figure 2. Complete pathway enrichment results corresponding to Figure 2F.


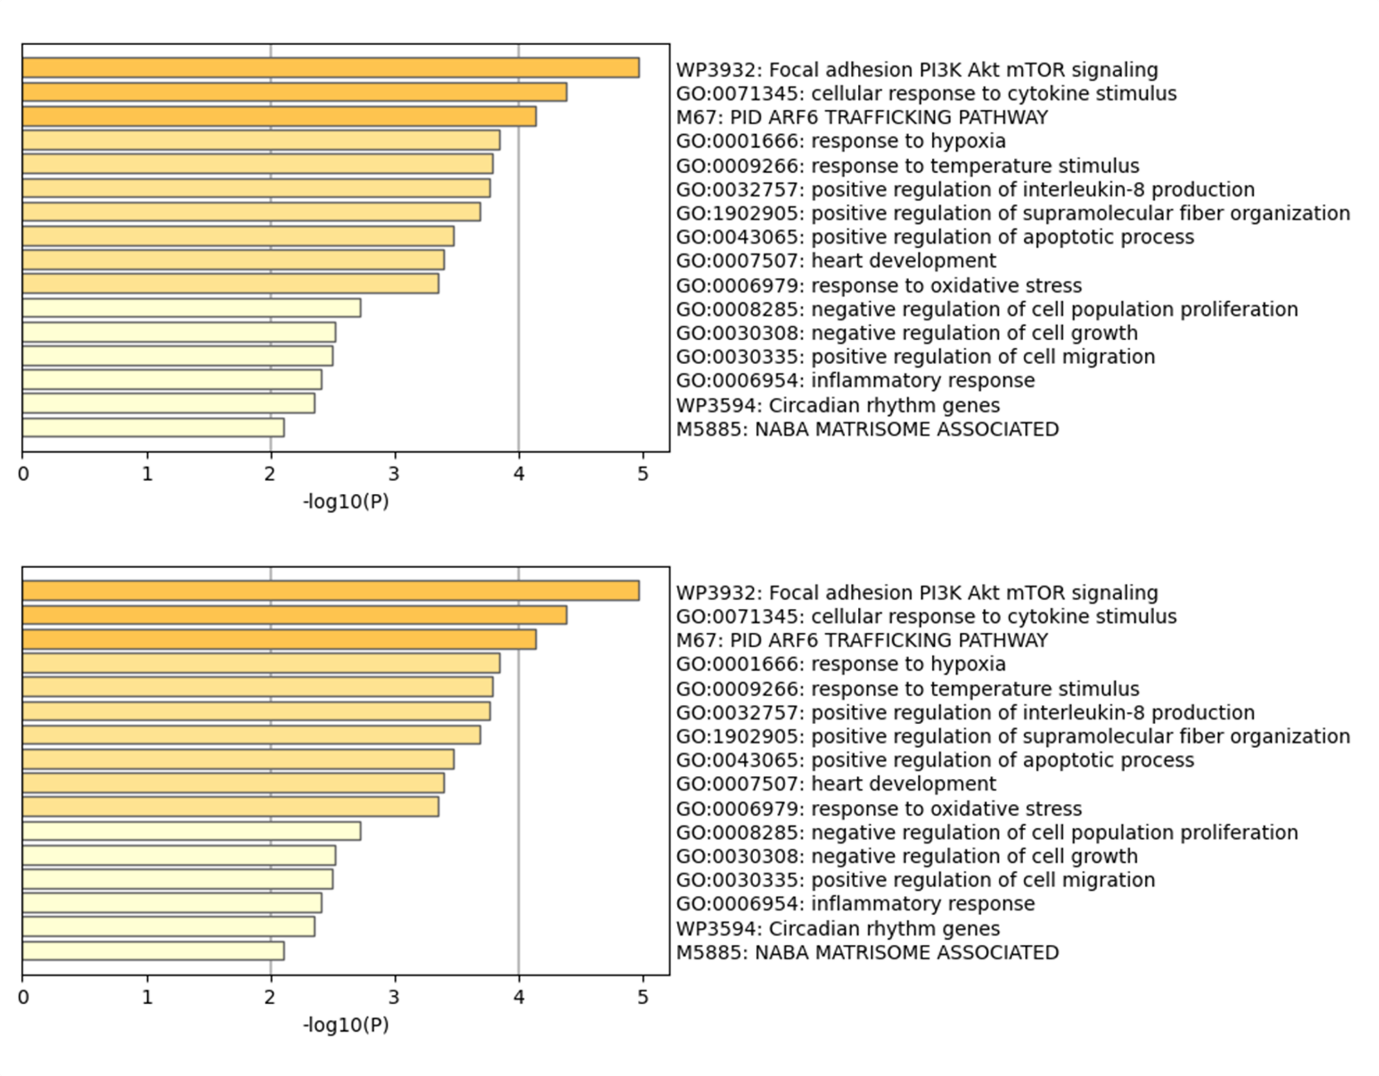

Supplement: Supplementary file 2 [file 2fc80bc7bb77dfe07f6d2447.docx]
